# Supplementary material for: Michellamines A6 and A7, and further mono- and dimeric naphthylisoquinoline alkaloids from a Congolese Ancistrocladus liana and their antiausterity activities against pancreatic cancer cells
Source: PubMed Central journal article supplement (PMC9078195; doi:10.1039/c8ra00363g), 2018-01-31
Supplement: RA-008-C8RA00363G-s001.pdf [file RA-008-C8RA00363G-s001.pdf]

## Electronic Supplementary Information for

### **Michellamines A<sub>6</sub> and A<sub>7</sub>, and further mono- and dimeric naphthylisoquinoline alkaloids from a Congolese *Ancistrocladus liana* and their antiausterity activities against pancreatic cancer cells**

Blaise Kimbadi Lombe,<sup>a,b</sup> Doris Feineis,<sup>a</sup> Virima Mudogo,<sup>b</sup> Reto Brun,<sup>c,d</sup> Suresh Awale\*<sup>e</sup> and Gerhard Bringmann\*<sup>a</sup>

<sup>a</sup>*Institute of Organic Chemistry, University of Würzburg, Am Hubland, D-97074 Würzburg, Germany. Email: [bringman@chemie.uni-wuerzburg.de](mailto:bringman@chemie.uni-wuerzburg.de); Fax: +49 931 31 84755*

<sup>b</sup>*Faculté des Sciences, Université de Kinshasa, B.P. 202, Kinshasa XI, Democratic Republic of the Congo*

<sup>c</sup>*Swiss Tropical and Public Health Institute, Socinstrasse 57, CH-4002 Basel, Switzerland*

<sup>d</sup>*University of Basel, Petersplatz 1, CH-4003 Basel, Switzerland*

<sup>e</sup>*Division of Natural Drug Discovery, Institute of Natural Medicine, University of Toyama, 2630 Sugitani, Toyama 930-0194, Japan. Email: [suresh@inm.u-toyama.ac.jp](mailto:suresh@inm.u-toyama.ac.jp)*

## Table of contents

|                                                                                                       |     |
|-------------------------------------------------------------------------------------------------------|-----|
| 1. Structures of korupensamine D and ancistrolikokine F                                               | P1  |
| 2. Preferential cytotoxicities of compounds <b>2</b> , <b>5</b> , <b>6</b> , <b>9</b> , and <b>10</b> | P1  |
| 3. Supplementary material for michellamine A <sub>6</sub> ( <b>1</b> )                                |     |
| NMR spectra in methanol- <i>d</i> <sub>4</sub>                                                        | P2  |
| HRESIMS spectrum                                                                                      | P9  |
| CD spectrum in methanol                                                                               | P10 |
| IR spectrum                                                                                           | P11 |
| Oxidation degradation                                                                                 | P12 |
| 4. Supplementary material for michellamine A <sub>7</sub> ( <b>2</b> )                                |     |
| NMR spectra in methanol- <i>d</i> <sub>4</sub>                                                        | P13 |
| HRESIMS                                                                                               | P20 |
| CD spectrum in methanol                                                                               | P21 |
| IR spectrum spectrum                                                                                  | P22 |
| Oxidation degradation                                                                                 | P23 |
| 5. Supplementary material for michellamine B <sub>4</sub> ( <b>3</b> )                                |     |
| NMR spectra in methanol- <i>d</i> <sub>4</sub>                                                        | P24 |
| HRESIMS spectrum                                                                                      | P31 |
| CD spectrum in methanol                                                                               | P32 |
| IR spectrum                                                                                           | P33 |
| Oxidation degradation                                                                                 | P34 |
| 6. Supplementary material for michellamine B <sub>5</sub> ( <b>4</b> )                                |     |
| NMR spectra in methanol- <i>d</i> <sub>4</sub>                                                        | P35 |
| HRESIMS spectrum                                                                                      | P42 |
| CD spectrum in methanol                                                                               | P43 |
| IR spectrum                                                                                           | P44 |
| Oxidation degradation                                                                                 | P45 |
| 7. Supplementary material for ancistrobonsoline A <sub>1</sub> ( <b>5</b> )                           |     |
| NMR spectra in methanol- <i>d</i> <sub>4</sub>                                                        | P46 |
| HRESIMS spectrum                                                                                      | P52 |
| CD spectrum in methanol                                                                               | P53 |
| IR spectrum                                                                                           | P54 |
| Oxidation degradation                                                                                 | P55 |
| 8. Supplementary material for ancistrobonsoline A <sub>2</sub> ( <b>6</b> )                           |     |
| NMR spectra in methanol- <i>d</i> <sub>4</sub>                                                        | P56 |
| HRESIMS spectrum                                                                                      | P63 |
| CD spectrum in methanol                                                                               | P64 |
| IR spectrum                                                                                           | P65 |
| Oxidation degradation                                                                                 | P66 |

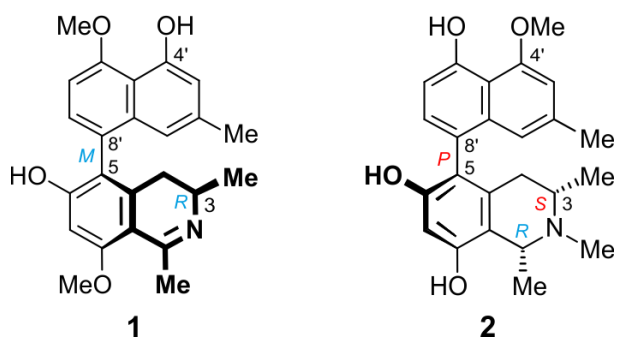

**Fig. S1** Structures of the already known naphthylisoquinolines ancistroltikokine F (**1**) and korupensamine D (**2**).

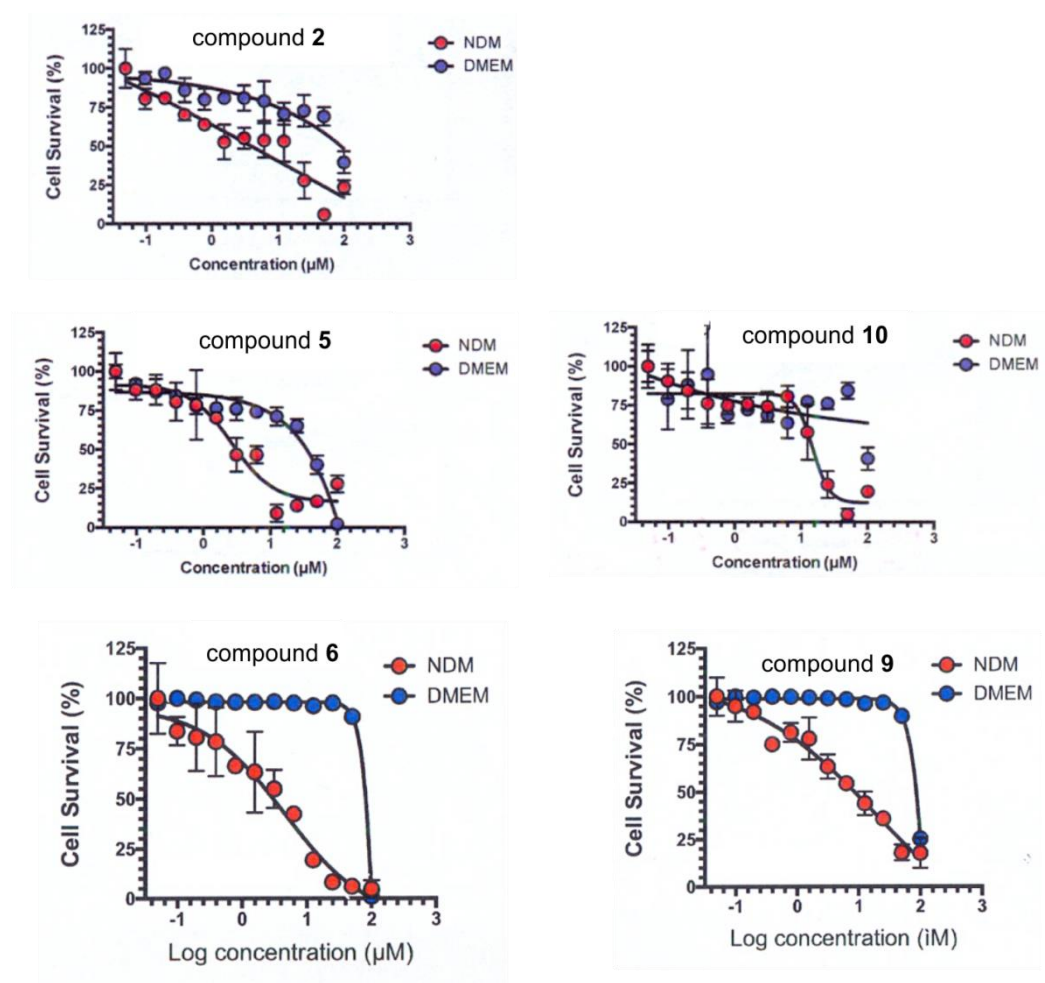

**Fig. S2** Preferential cytotoxic activity of michellamines A<sub>7</sub> (**2**), A<sub>2</sub> (**9**), and E (**10**), and ancistrobansolines A<sub>1</sub> (**5**) and A<sub>2</sub> (**6**) against the PANC-1 human pancreatic cancer cell line in nutrient-deprived medium (NDM) and Dulbecco's modified Eagle's medium (DMEM)

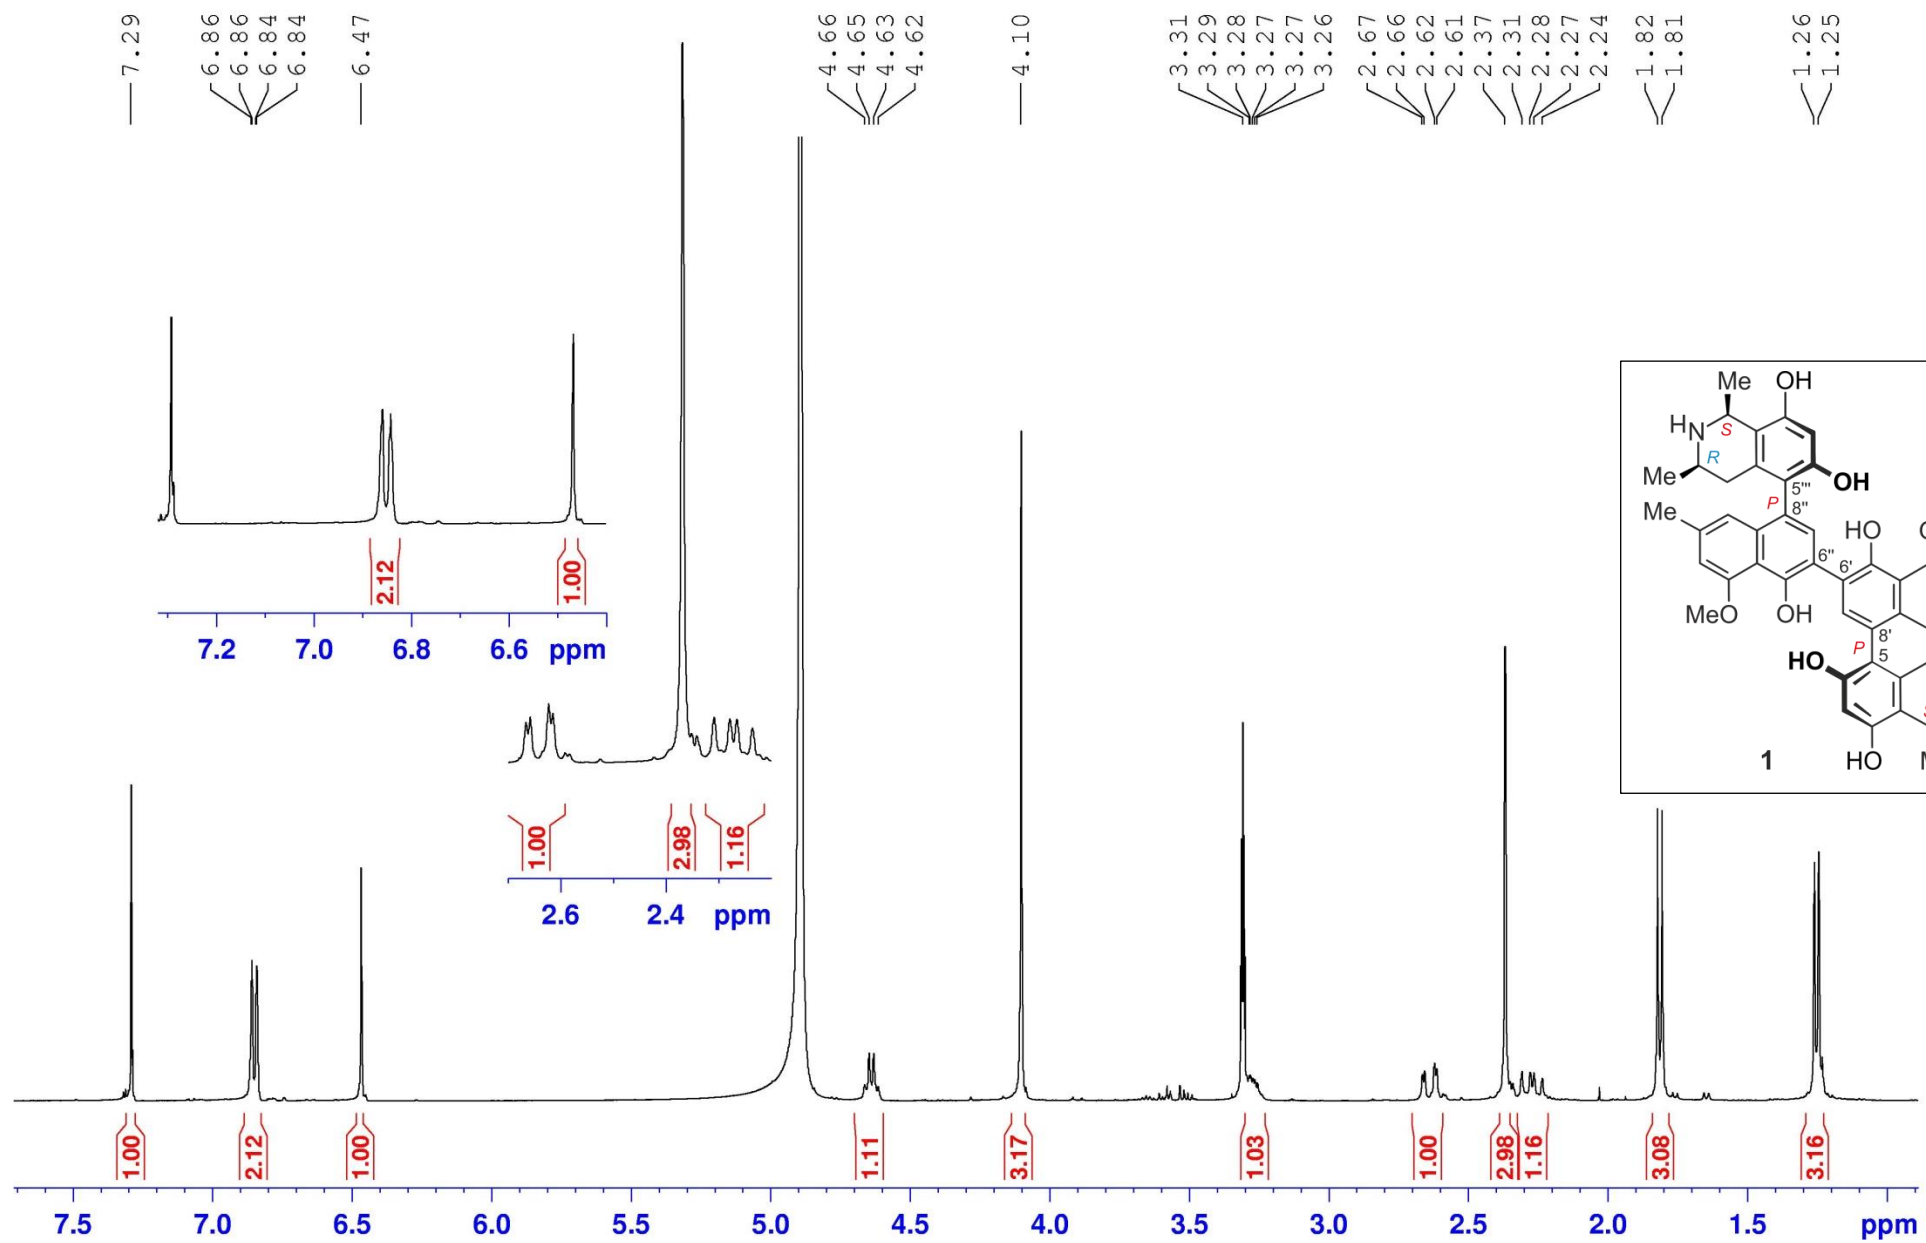

Fig. S3 <sup>1</sup>H NMR spectrum of compound **1** in methanol-*d*<sub>4</sub>

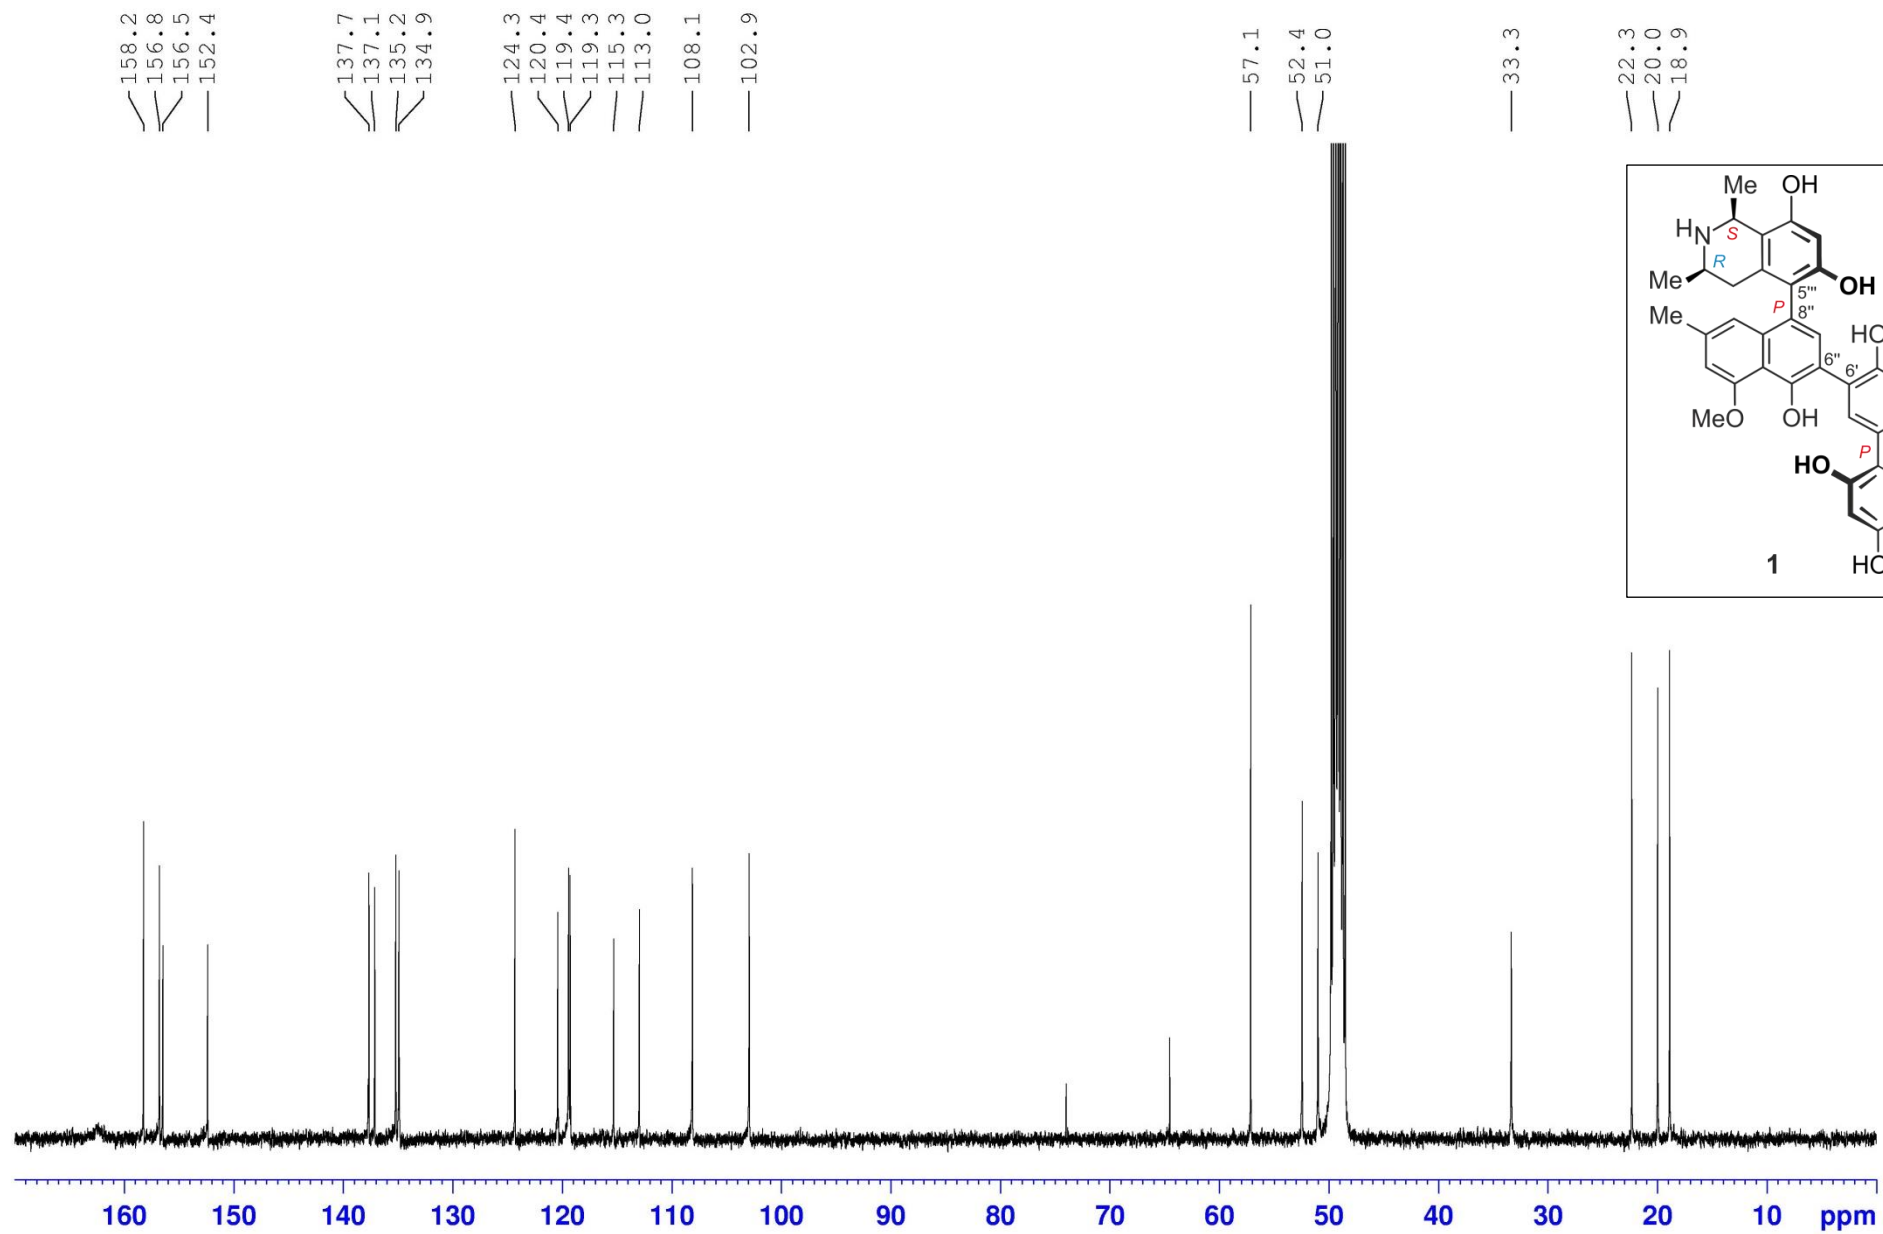

Fig. S4  $^{13}\text{C}$  NMR spectrum of compound **1** in methanol- $d_4$



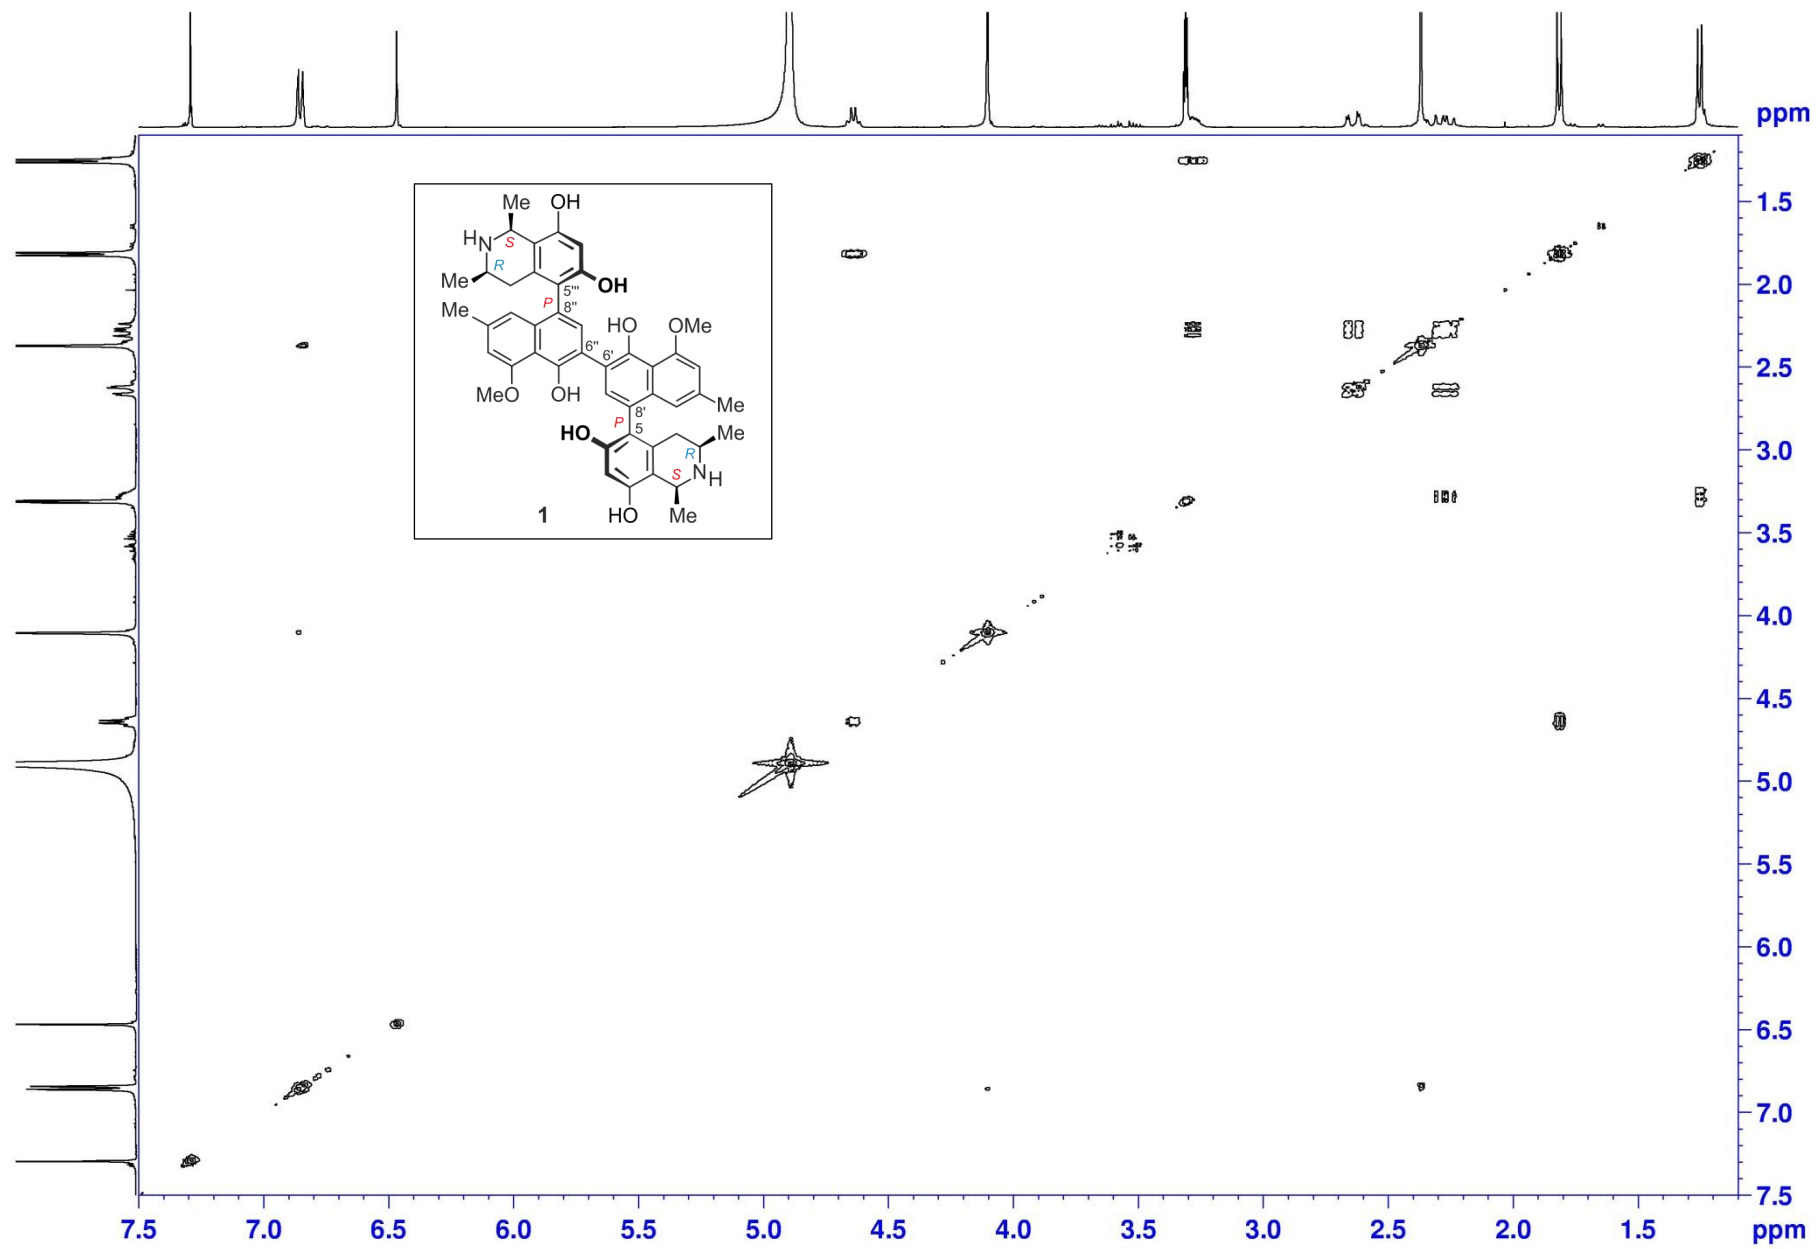

**Fig. S6** COSY NMR spectrum of compound **1** in methanol- $d_4$

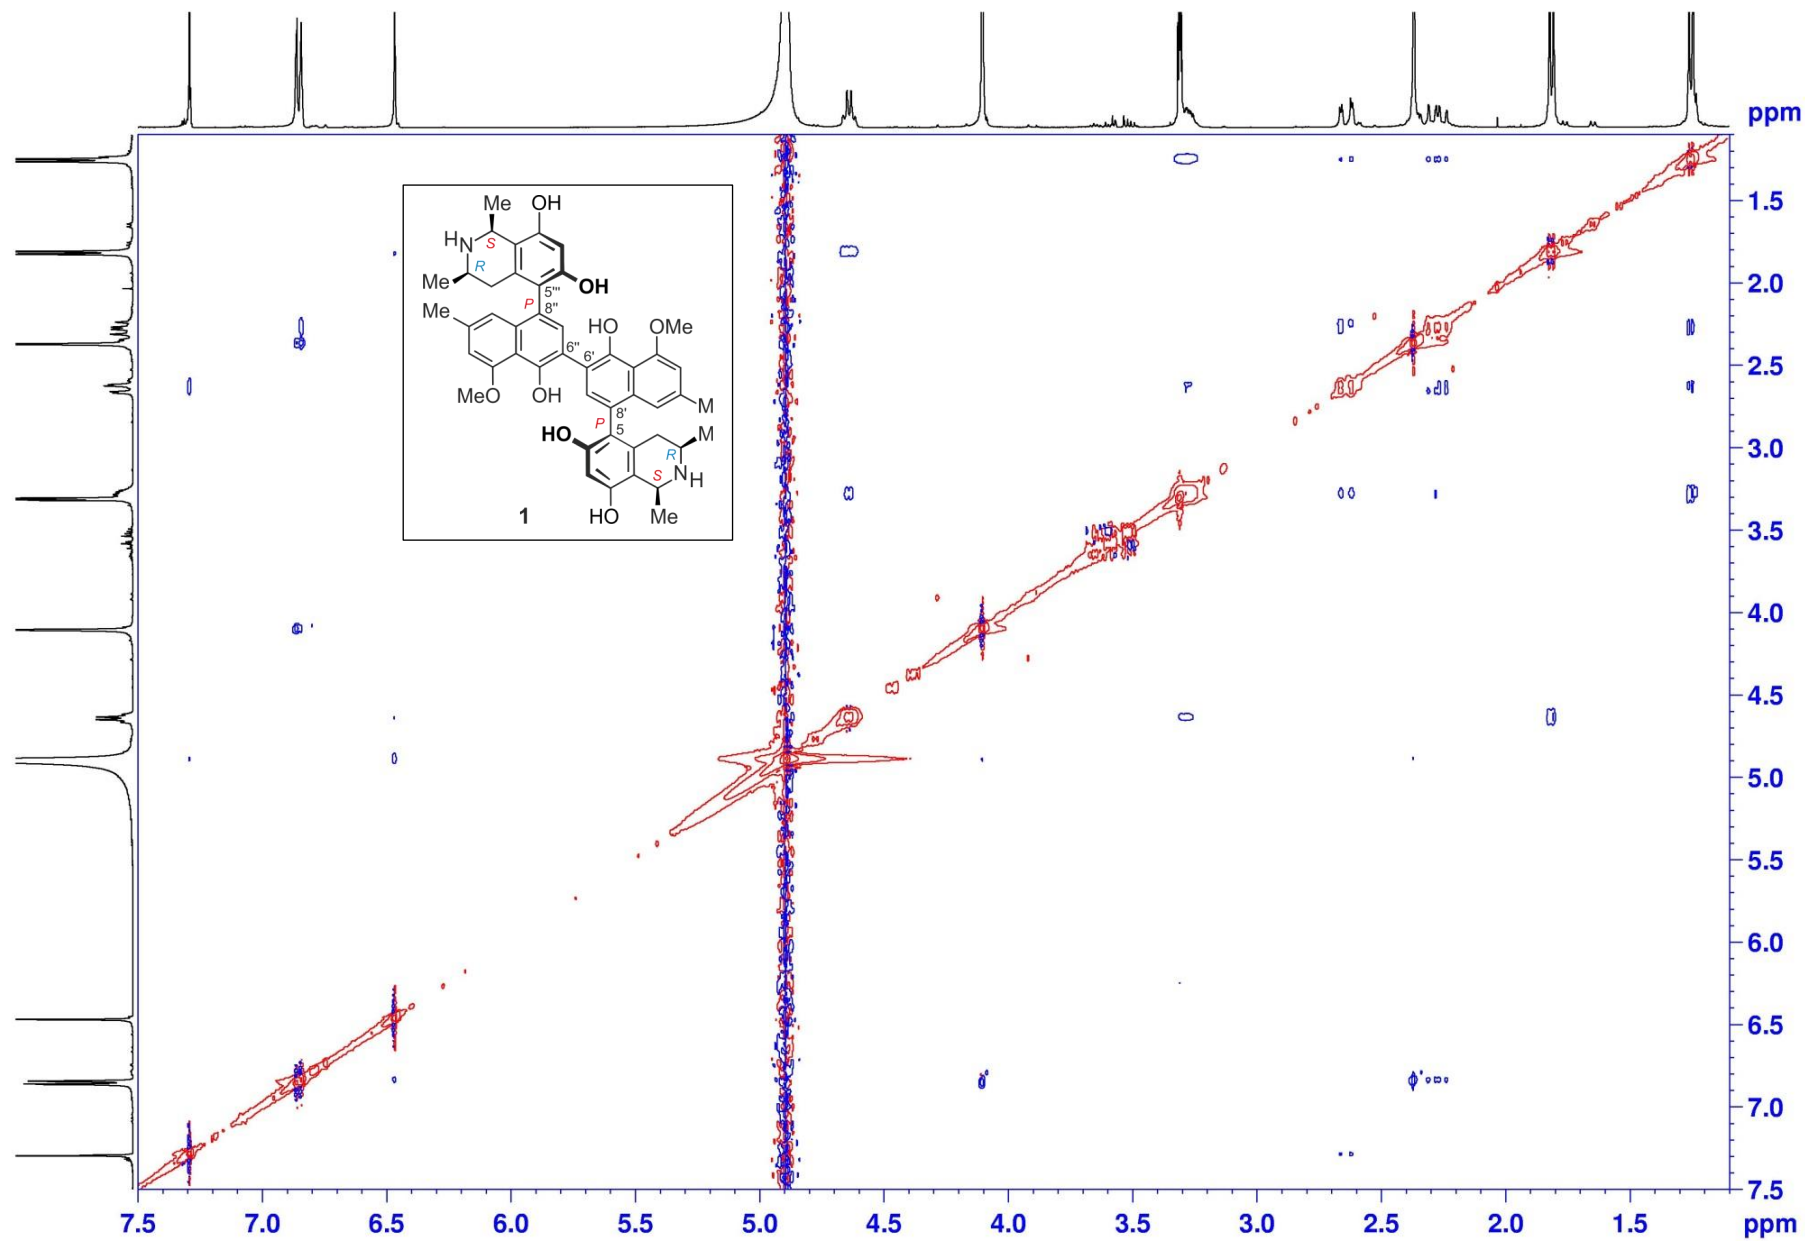

Fig. S7 NOESY NMR spectrum of compound 1 in methanol- $d_4$



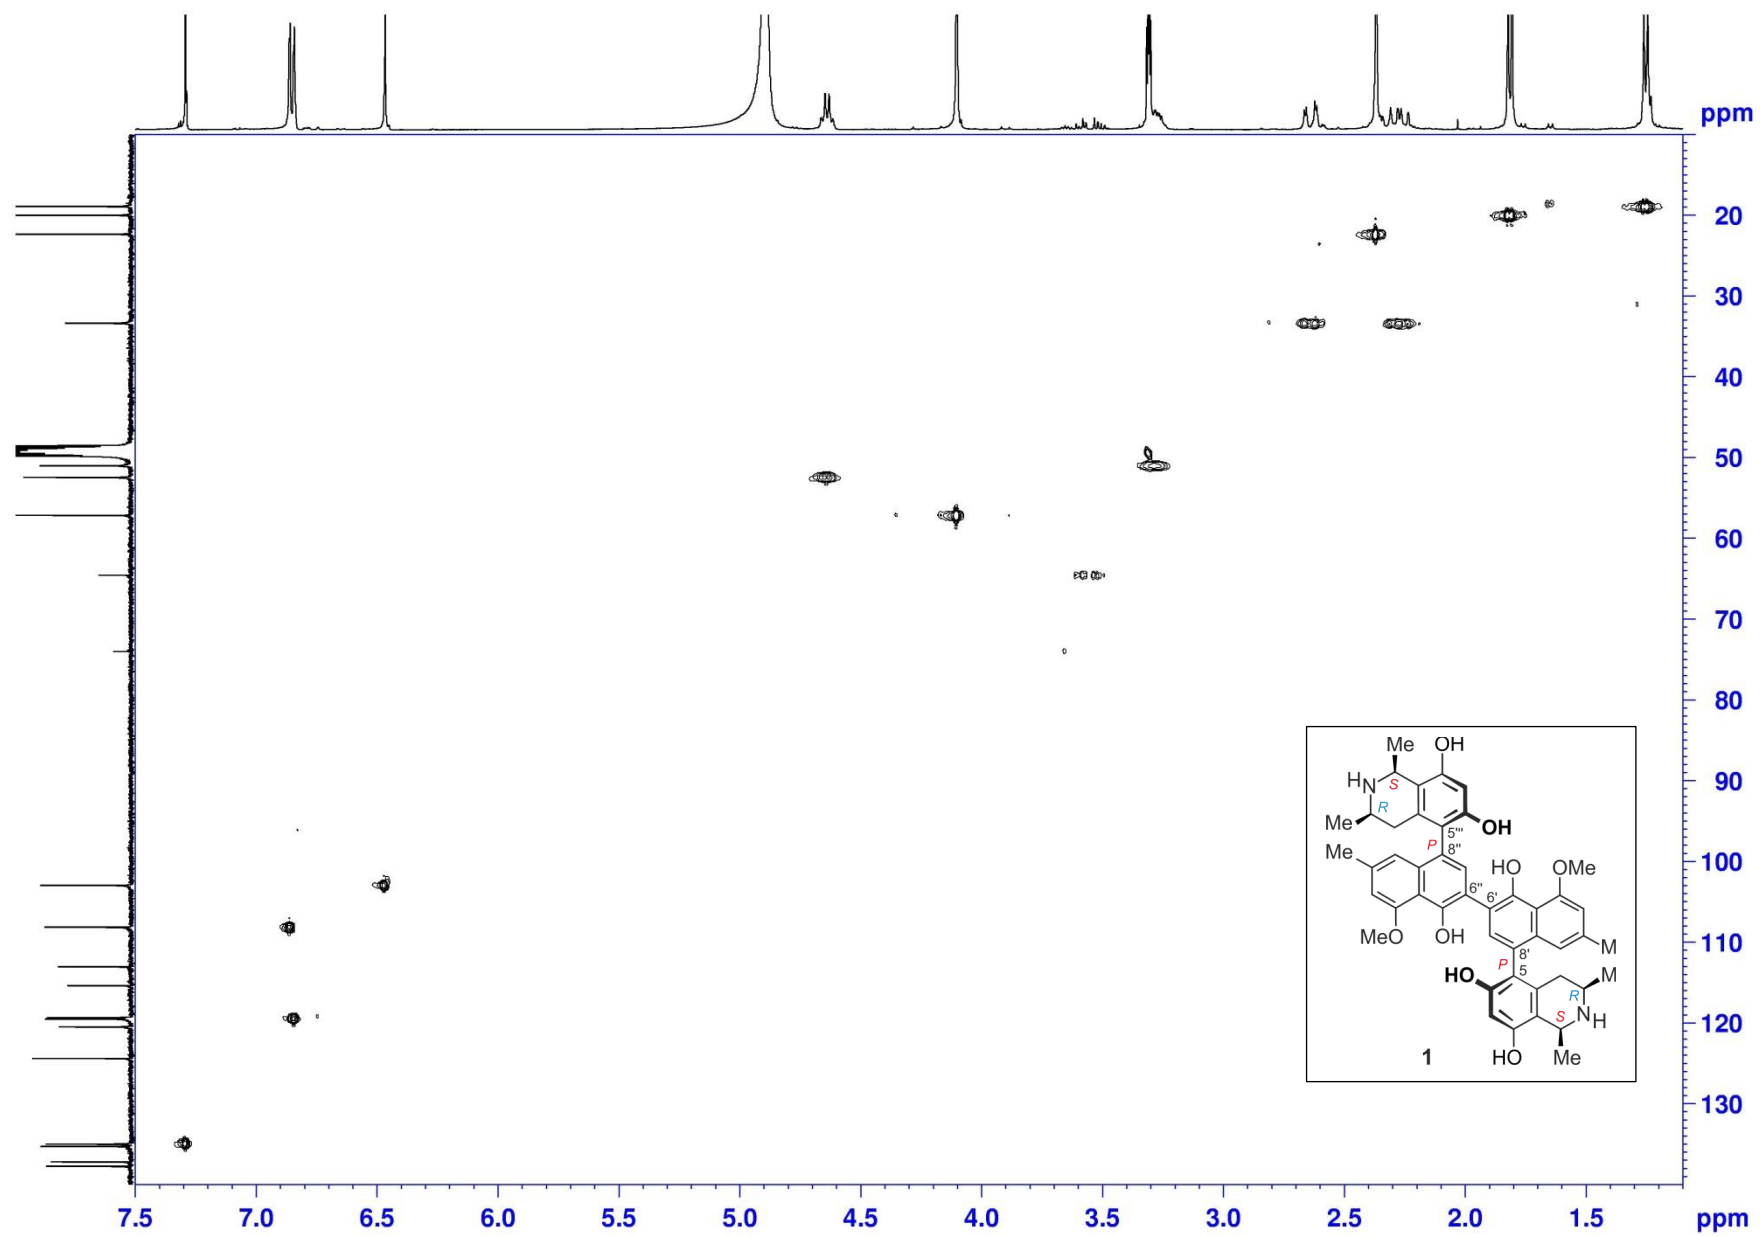

Fig. S8 HSQC NMR spectrum of compound **1** in methanol- $d_4$

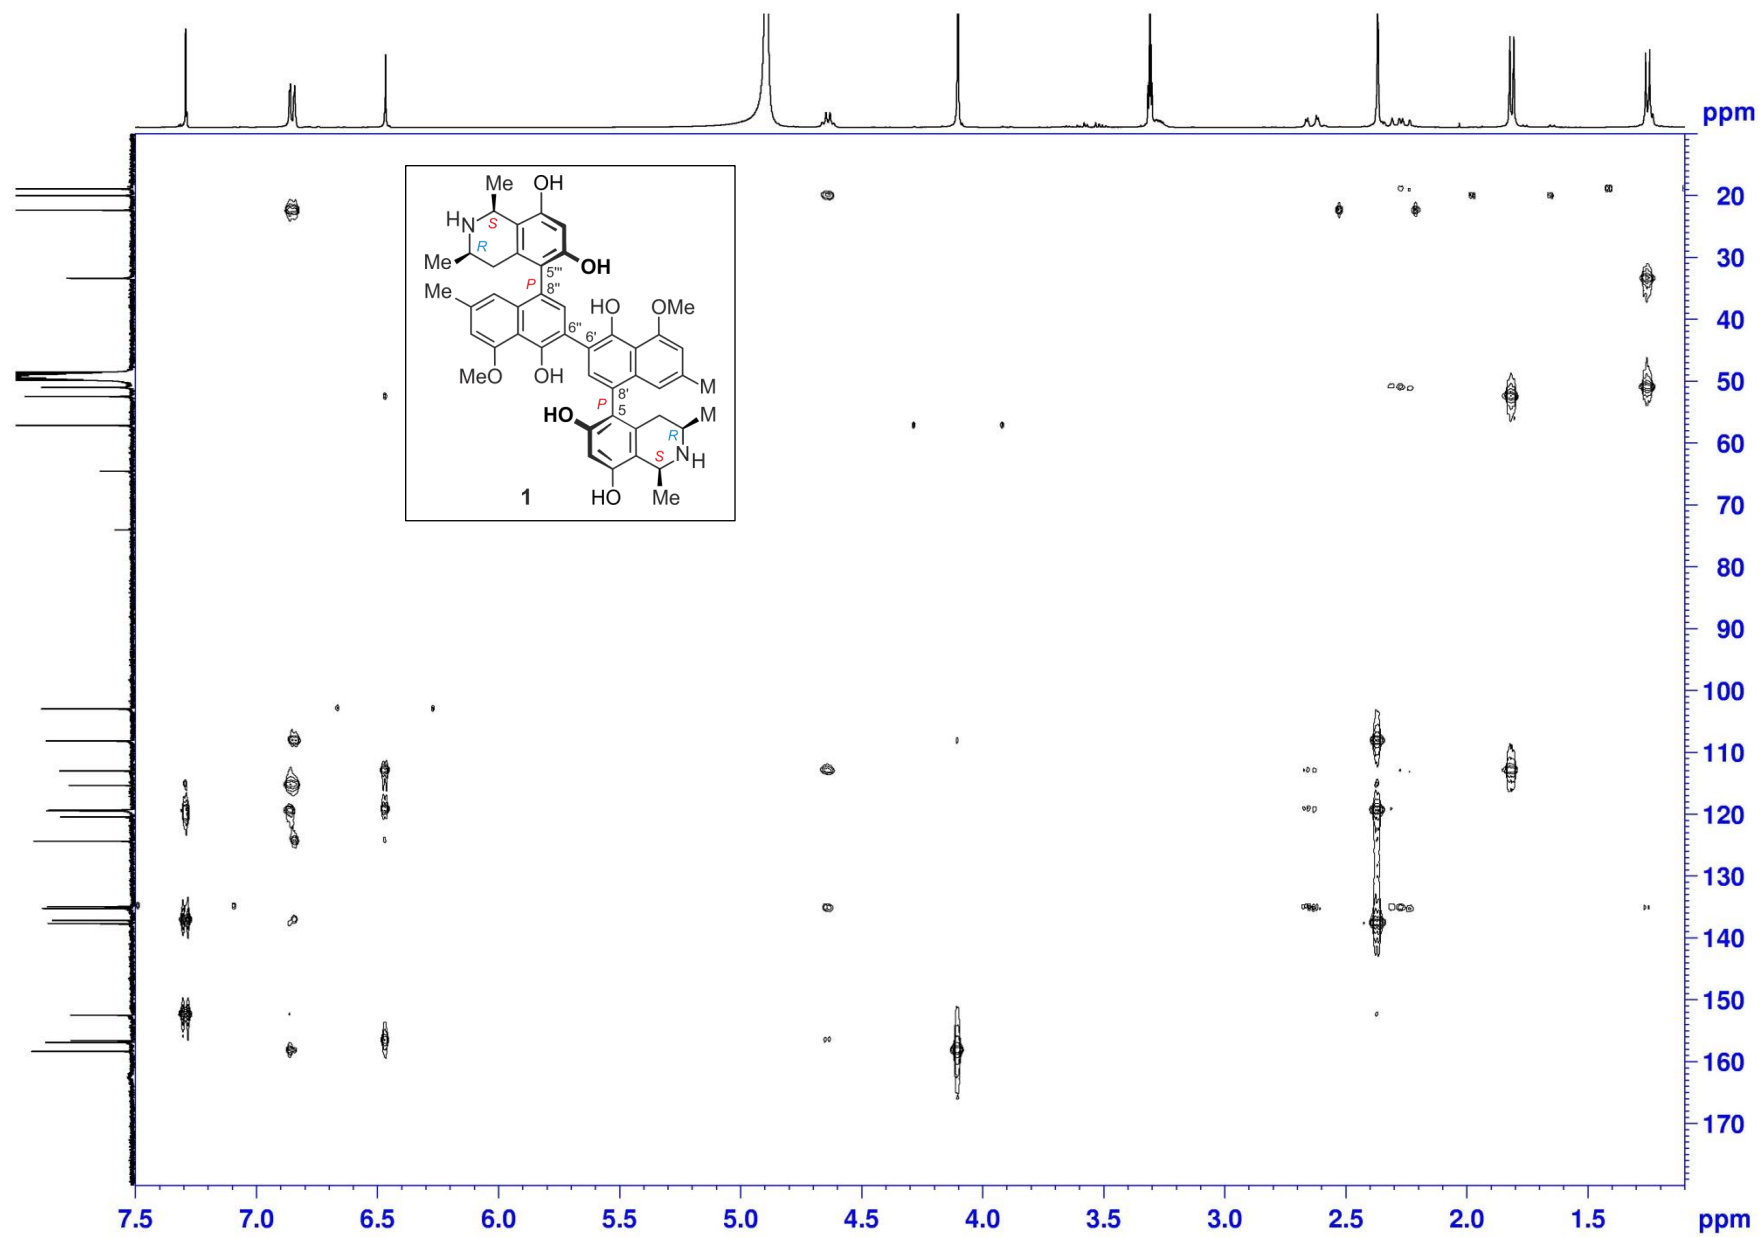

**Fig. S9** HMBC NMR spectrum of compound **1** in methanol-*d*<sub>4</sub>

## Mass Spectrum Molecular Formula Report

## Analysis Info

Analysis Name D:\Data\Spektren2015\2015\_2603\_WUE.d  
 Method esi\_tune\_pos\_wide.m  
 Comment Blaise Kimbadi Lombe  
 BO3-H2O-4  
 8 pmol/ $\mu$ l in MeOH

Acquisition Date 14.12.2015 13:25:13  
 Operator Administrator  
 Instrument micrOTOF 88

## Acquisition Parameter

|             |          |                |          |                    |        |
|-------------|----------|----------------|----------|--------------------|--------|
| Source Type | ESI      | Ion Polarity   | Positive | Set Corrector Fill | 48 V   |
| Scan Range  | n/a      | Capillary Exit | 200.0 V  | Set Pulsar Pull    | 804 V  |
| Scan Begin  | 50 m/z   | Hexapole RF    | 380.0 V  | Set Pulsar Push    | 807 V  |
| Scan End    | 3500 m/z | Skimmer 1      | 50.0 V   | Set Reflector      | 1700 V |
|             |          | Hexapole 1     | 23.0 V   | Set Flight Tube    | 8600 V |
|             |          |                |          | Set Detector TOF   | 2140 V |

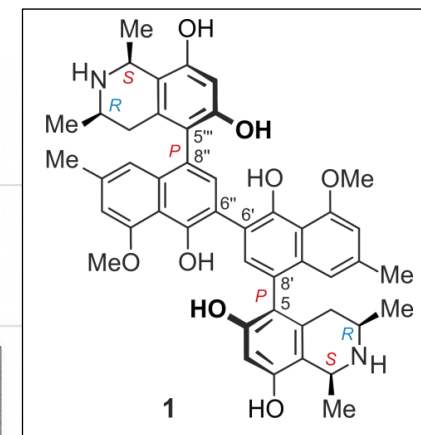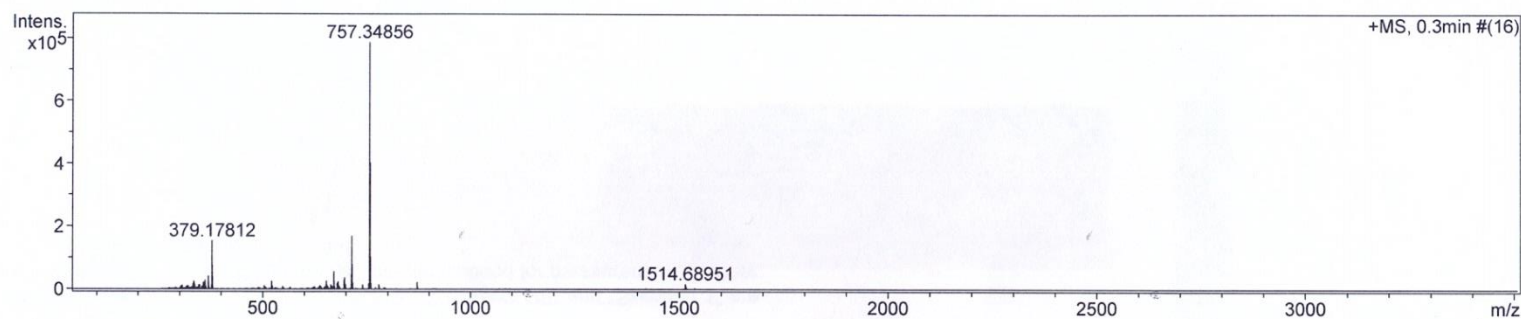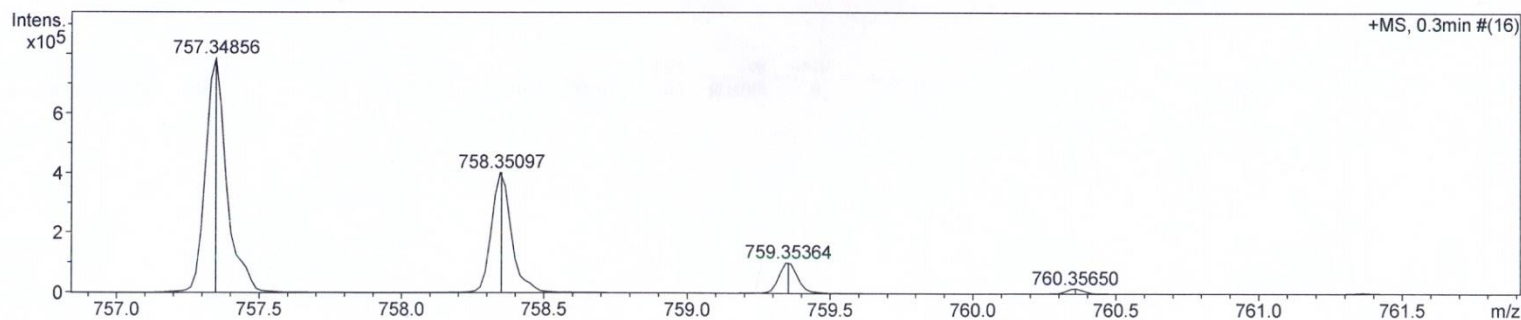

| Sum Formula       | Sigma | m/z       | Err [ppm] | Mean Err [ppm] | rdB   | N Rule | e <sup>-</sup> |
|-------------------|-------|-----------|-----------|----------------|-------|--------|----------------|
| C 46 H 49 N 2 O 8 | 0.01  | 757.34834 | -0.29     | 0.26           | 23.50 | ok     | even           |

Fig. S10 HRESIMS spectrum of compound 1

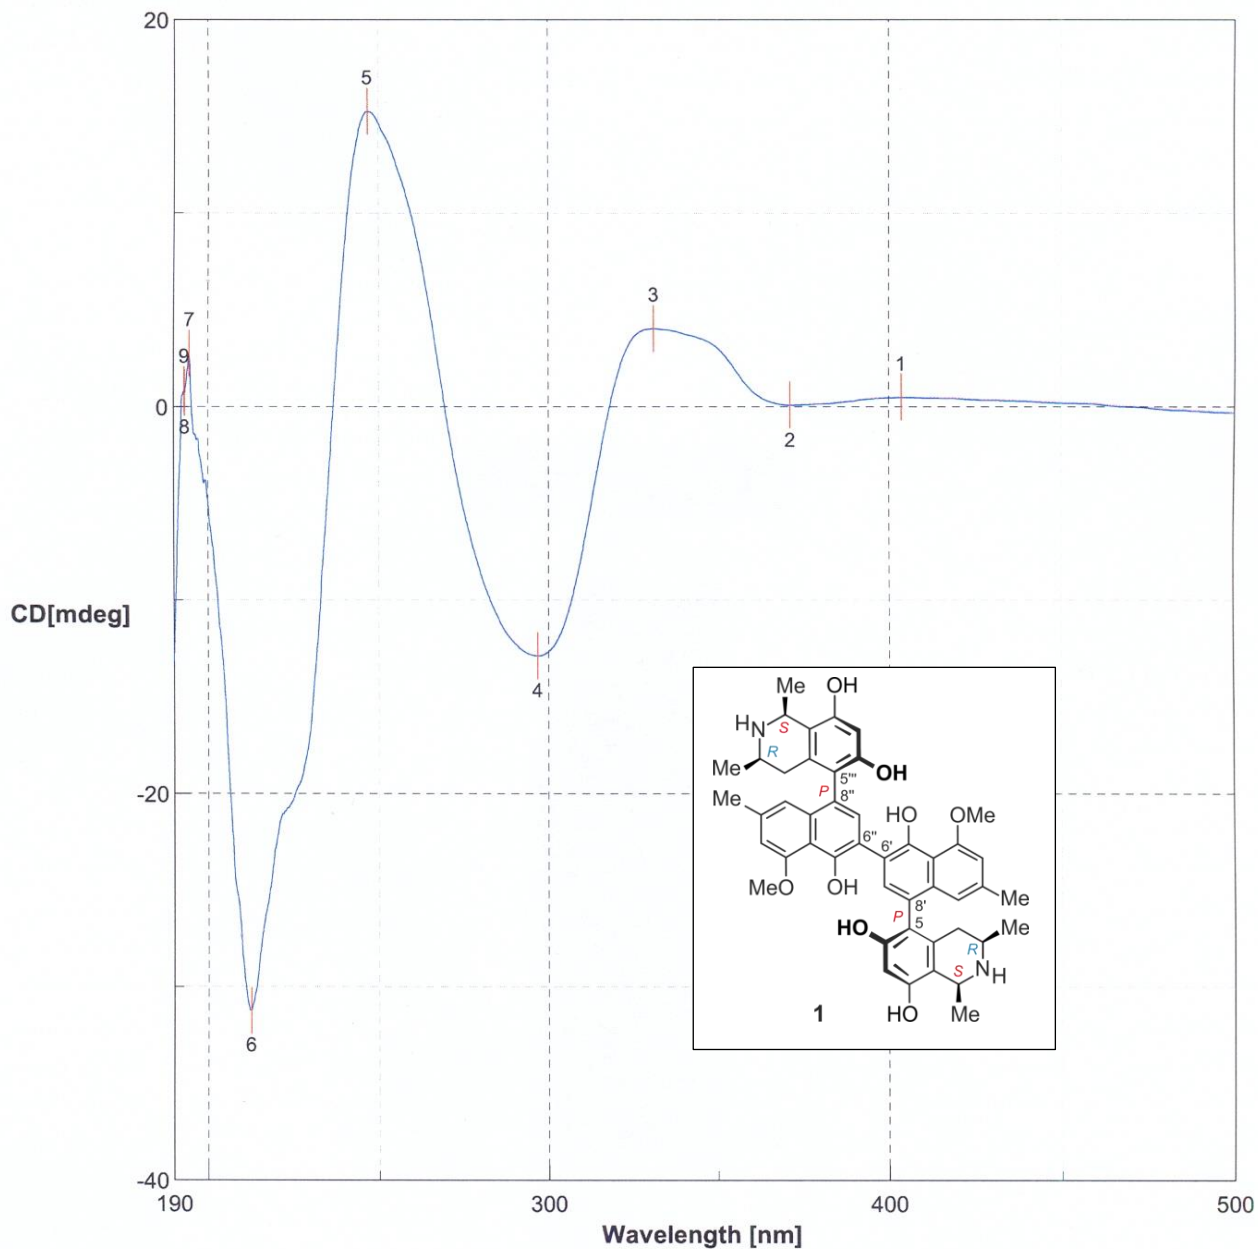

Date/Time 22.12.2015 16:21  
 Operator Kimbadi  
 File Name BO3-H2O-4#005.jws  
 Sample Name BO3-H2O-4  
 Comment offline

| No. | nm    | CD[mdeg] | No. | nm    | CD[mdeg]  | No. | nm    | CD[mdeg] |
|-----|-------|----------|-----|-------|-----------|-----|-------|----------|
| 1   | 403.6 | 0.467302 | 2   | 371.2 | 0.0578394 | 3   | 331.1 | 4.01686  |
| 4   | 296.8 | -12.8825 | 5   | 246.7 | 15.2553   | 6   | 212.4 | -31.2292 |
| 7   | 194.6 | 2.7439   | 8   | 193.2 | 0.727451  | 9   | 193.1 | 0.852667 |

Fig. S11 CD spectrum of compound 1 in methanol

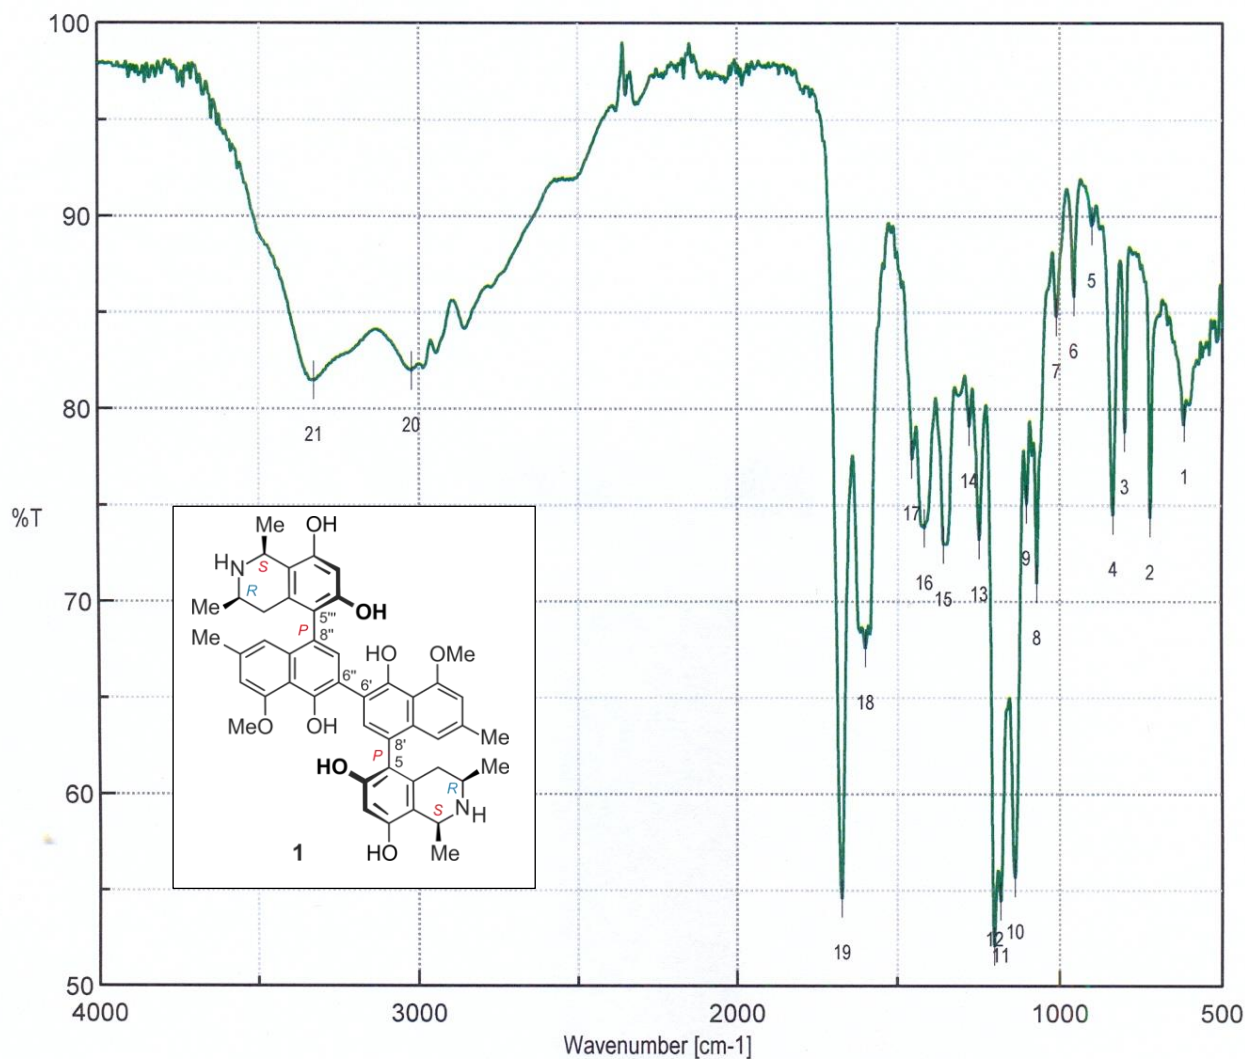

Results of Peak Find

| No. | Position | Intensity | No. | Position | Intensity |
|-----|----------|-----------|-----|----------|-----------|
| 1   | 617.109  | 79.2789   | 2   | 722.211  | 74.3236   |
| 3   | 799.35   | 78.7506   | 4   | 835.99   | 74.4534   |
| 5   | 901.558  | 89.4596   | 6   | 956.52   | 85.8008   |
| 7   | 1009.55  | 84.7557   | 8   | 1071.26  | 70.8984   |
| 9   | 1102.12  | 75.0456   | 10  | 1137.8   | 55.6355   |
| 11  | 1181.19  | 54.3946   | 12  | 1200.47  | 52.0827   |
| 13  | 1248.68  | 73.1612   | 14  | 1279.54  | 79.0713   |
| 15  | 1358.6   | 72.9091   | 16  | 1418.39  | 73.7761   |
| 17  | 1455.99  | 77.3635   | 18  | 1599.66  | 67.5549   |
| 19  | 1671.98  | 54.5506   | 20  | 3022.87  | 81.9626   |
| 21  | 3328.53  | 81.4322   |     |          |           |

[Comments]

Sample name BO3-H2O-4  
 Comment drop(MeOH)  
 User Kimbadi  
 Division AK Bringmann  
 Company Uni Würzburg

[Measurement Information]

Model Name FT/IR-4600typeA  
 Serial Number D063461786

Accessory ATR PRO ONE  
 Accessory S/N A070661809  
 Incident angle 45 deg

Measurement Date 20.12.2017 14:11

Light Source Standard  
 Detector TGS  
 Accumulation 16  
 Resolution 4 cm-1  
 Zero Filling On  
 Apodization Cosine  
 Gain Auto (4)  
 Aperture Auto (7.1 mm)  
 Scanning Speed Auto (2 mm/sec)  
 Filter Auto (30000 Hz)

Fig. S12 IR spectrum of compound 1

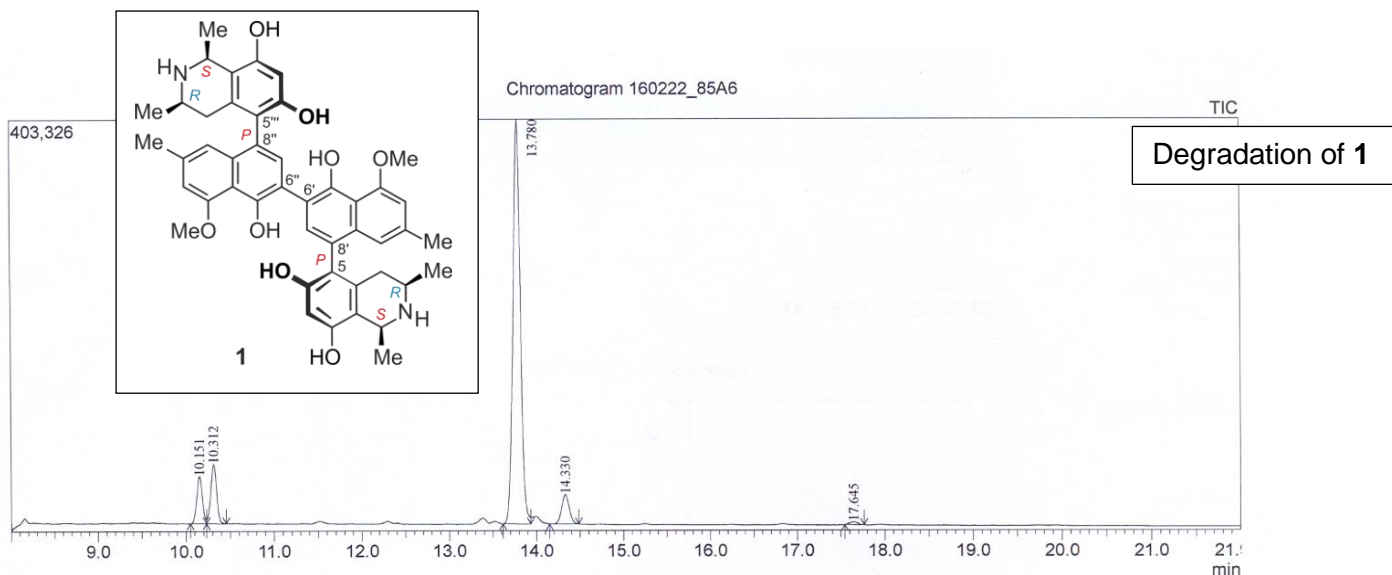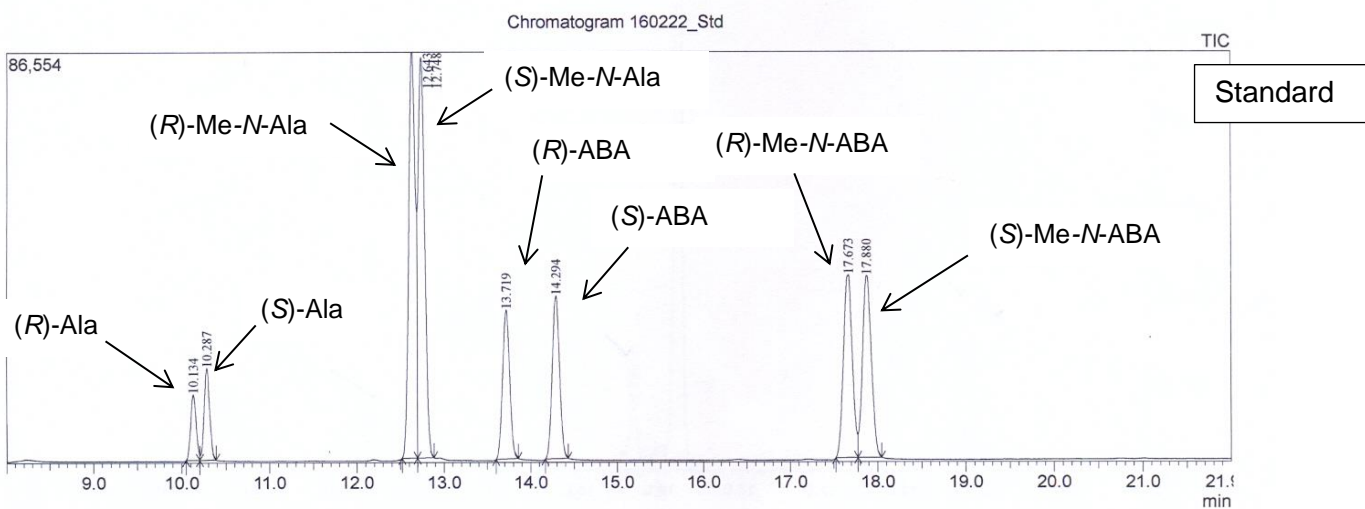

Where: Ala = alanine; Me-N-Ala = *N*-methylalanine;  
 ABA = 3-aminobutyric acid; Me-N-ABA = *N*-methyl 3-aminobutyric acid

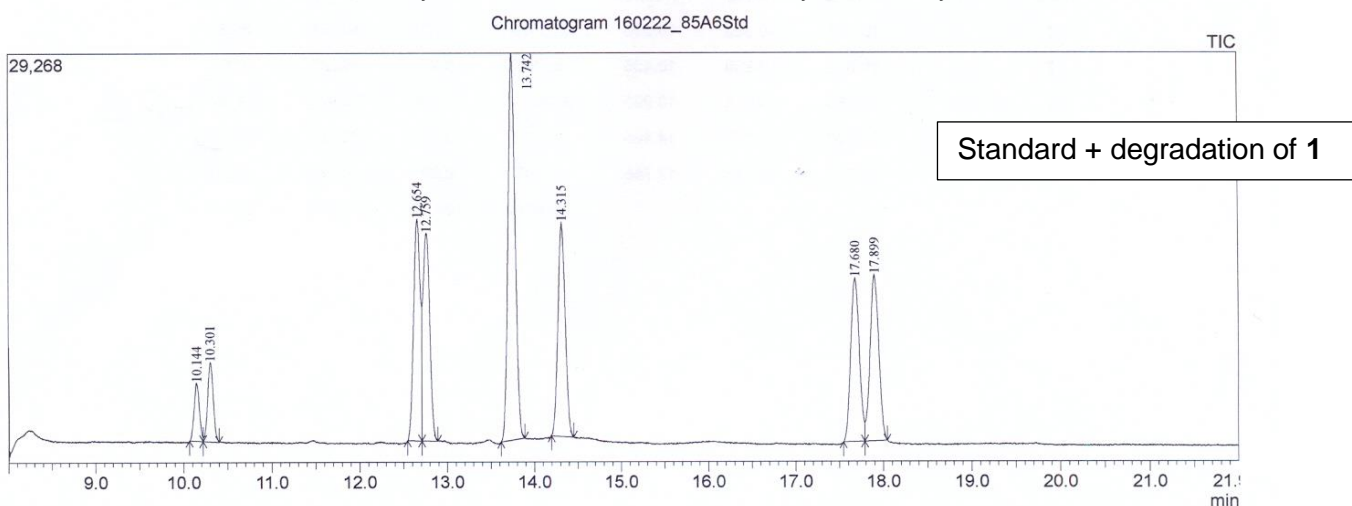

**Fig. S13** Results of the oxidative degradation of compound **1**

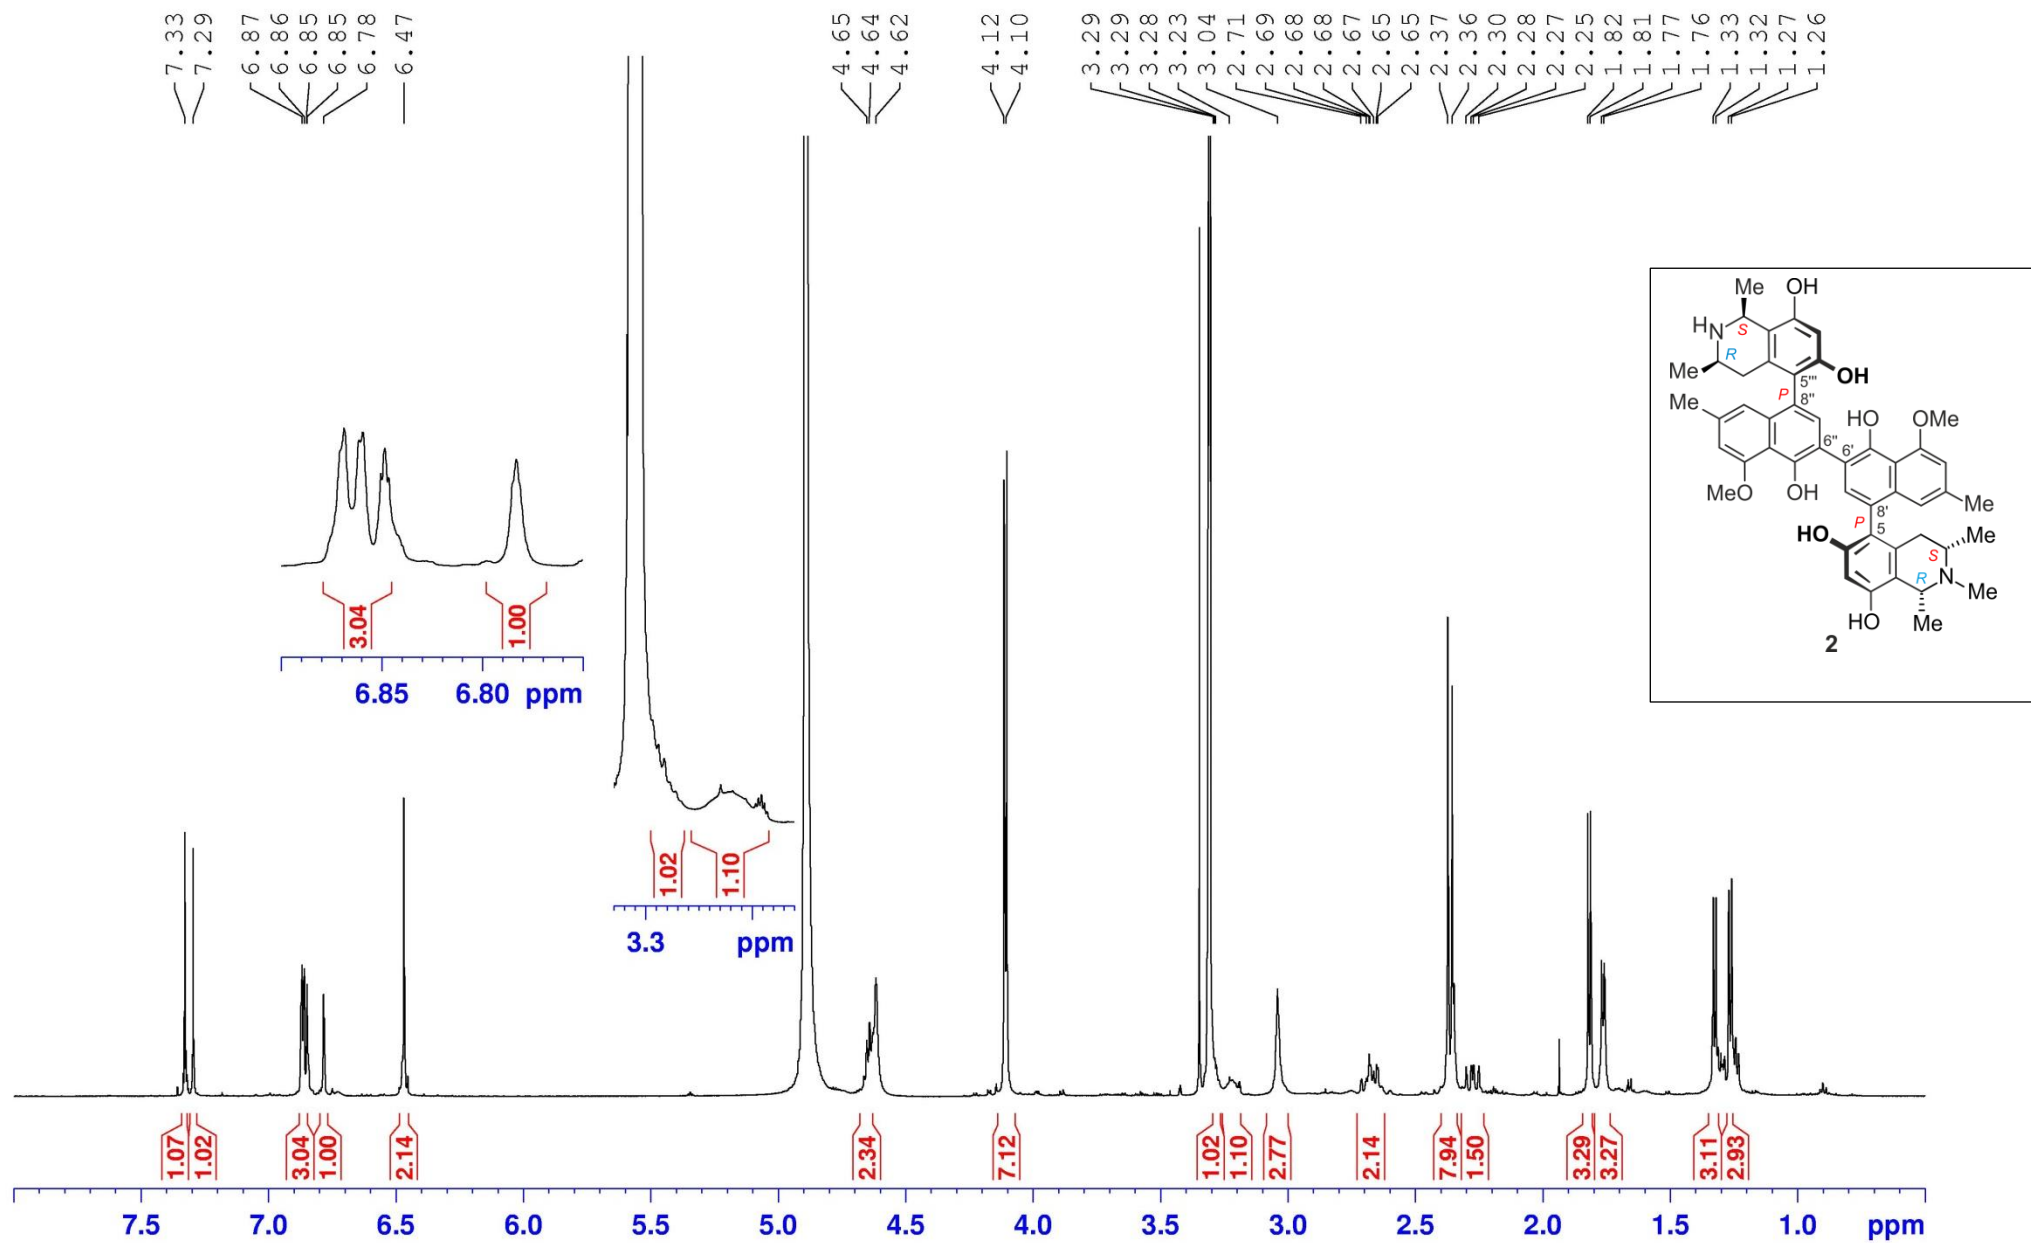

Fig. S14  $^1\text{H}$  NMR spectrum of compound 2 in methanol- $d_4$

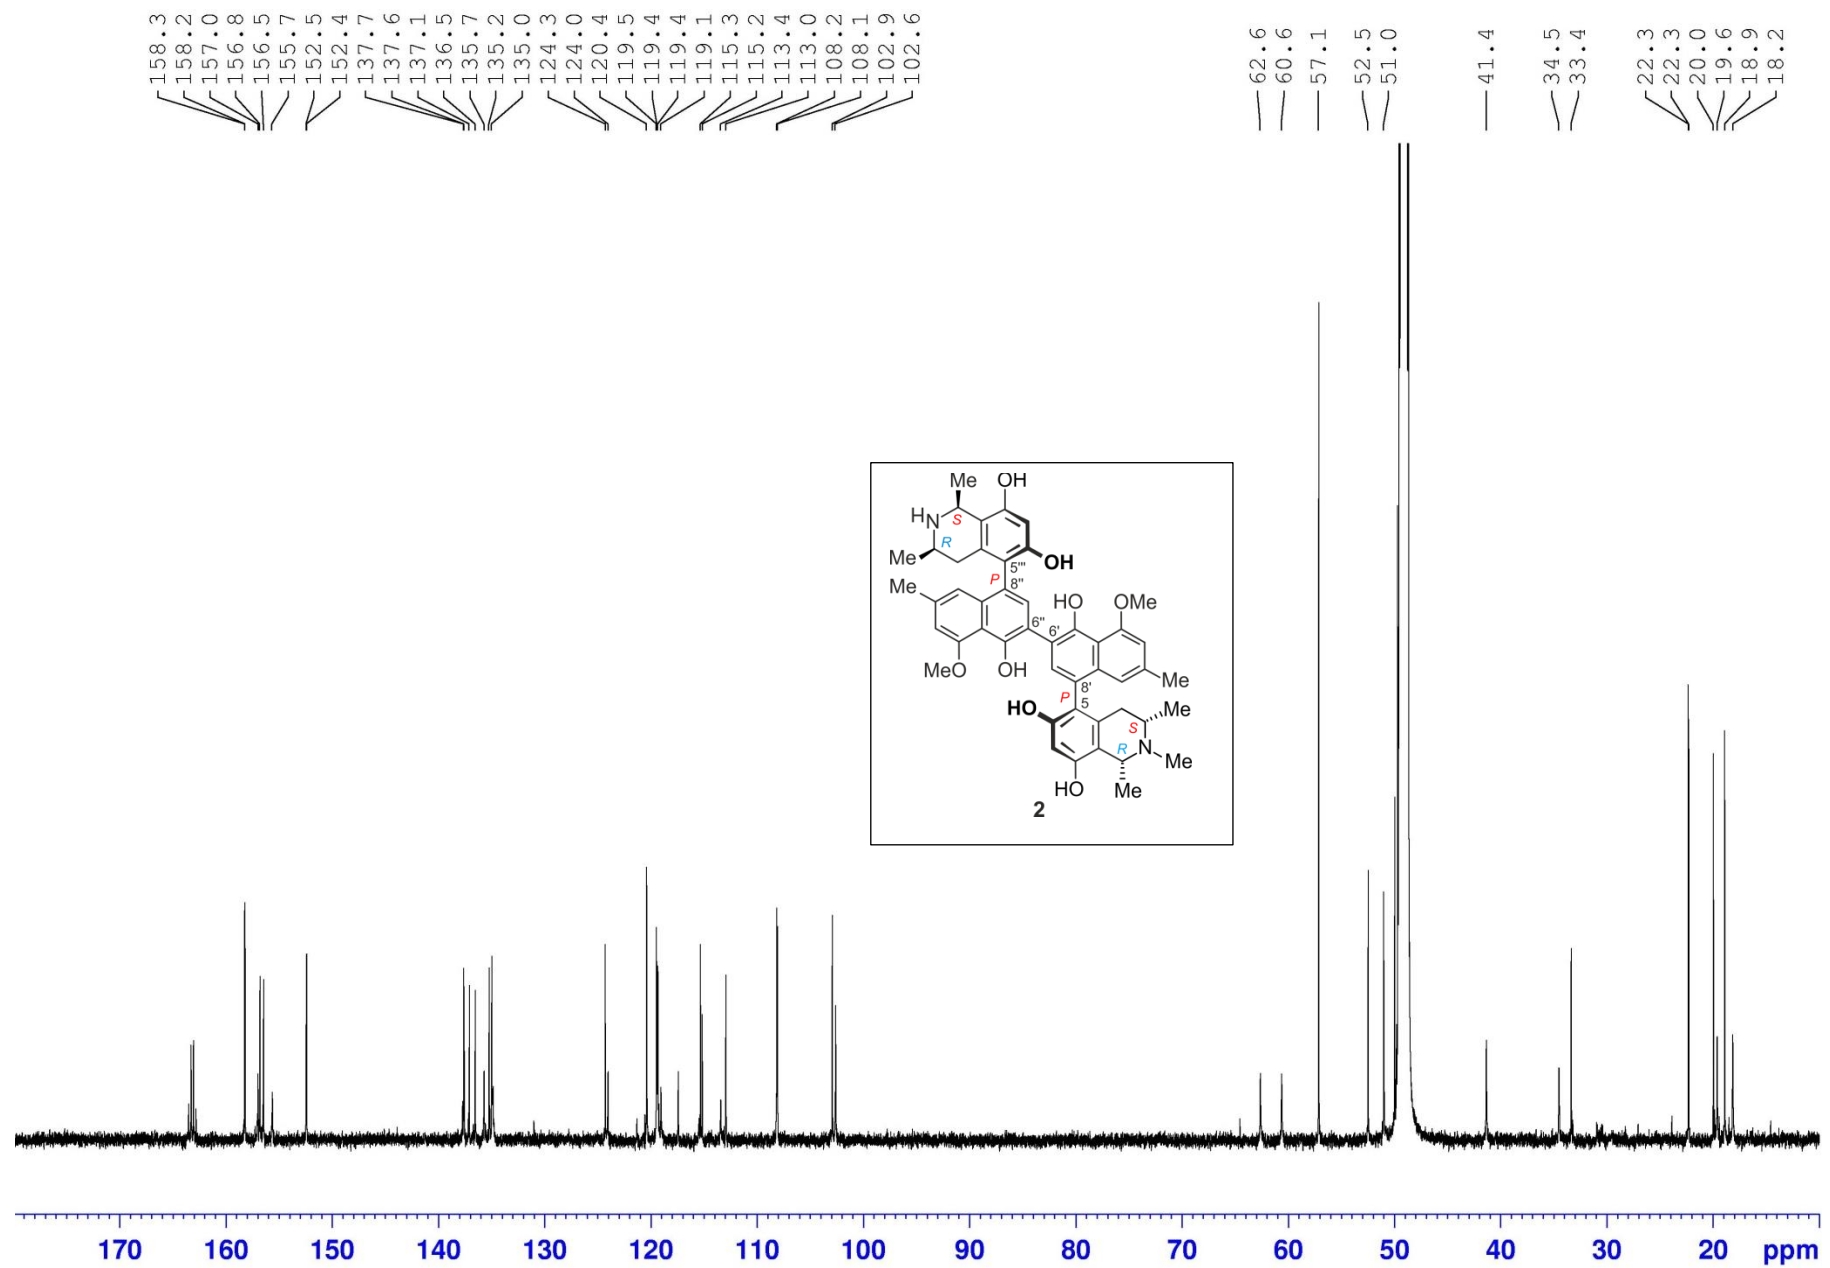

Fig. S15  $^{13}\text{C}$  NMR spectrum of compound **2** in methanol- $d_4$



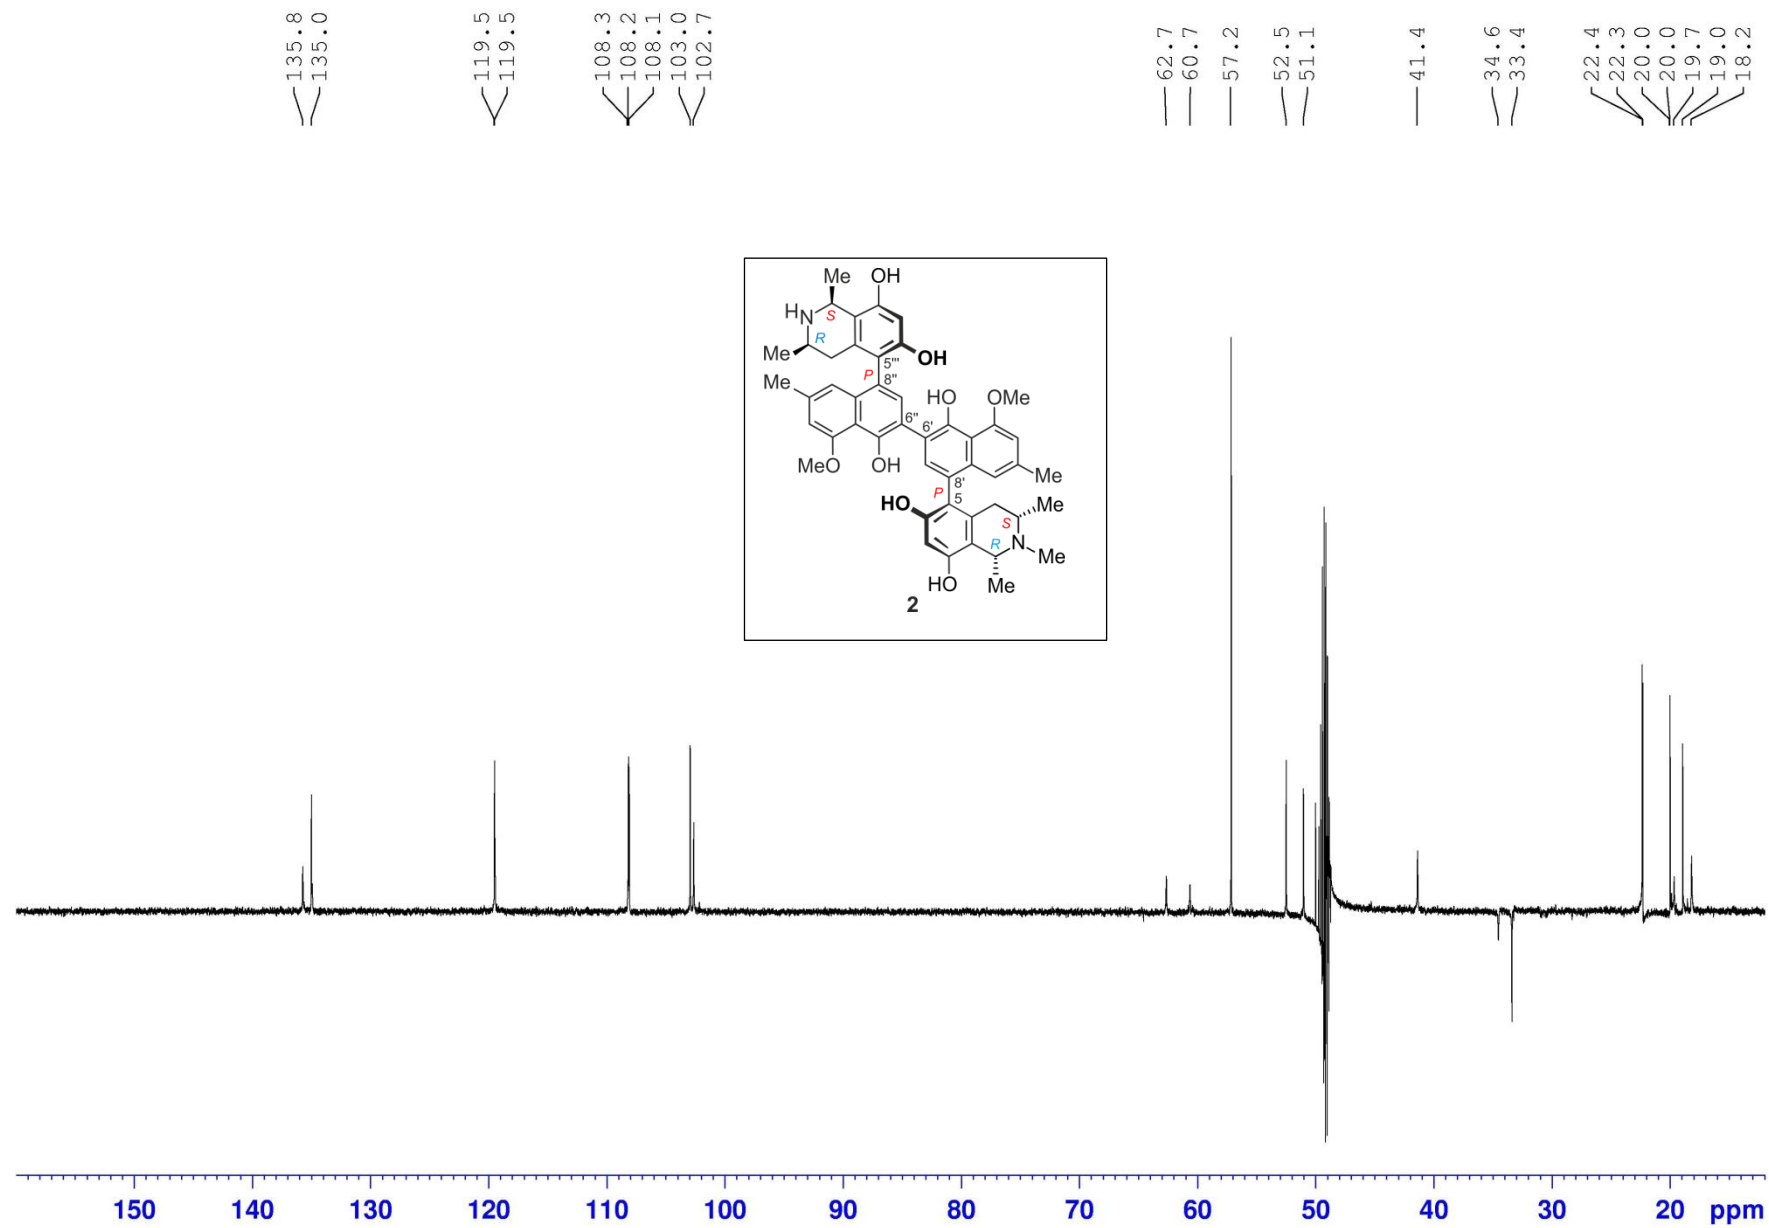

**Fig. S16** DEPT-135 NMR spectrum of compound **2** in methanol-*d*<sub>4</sub>

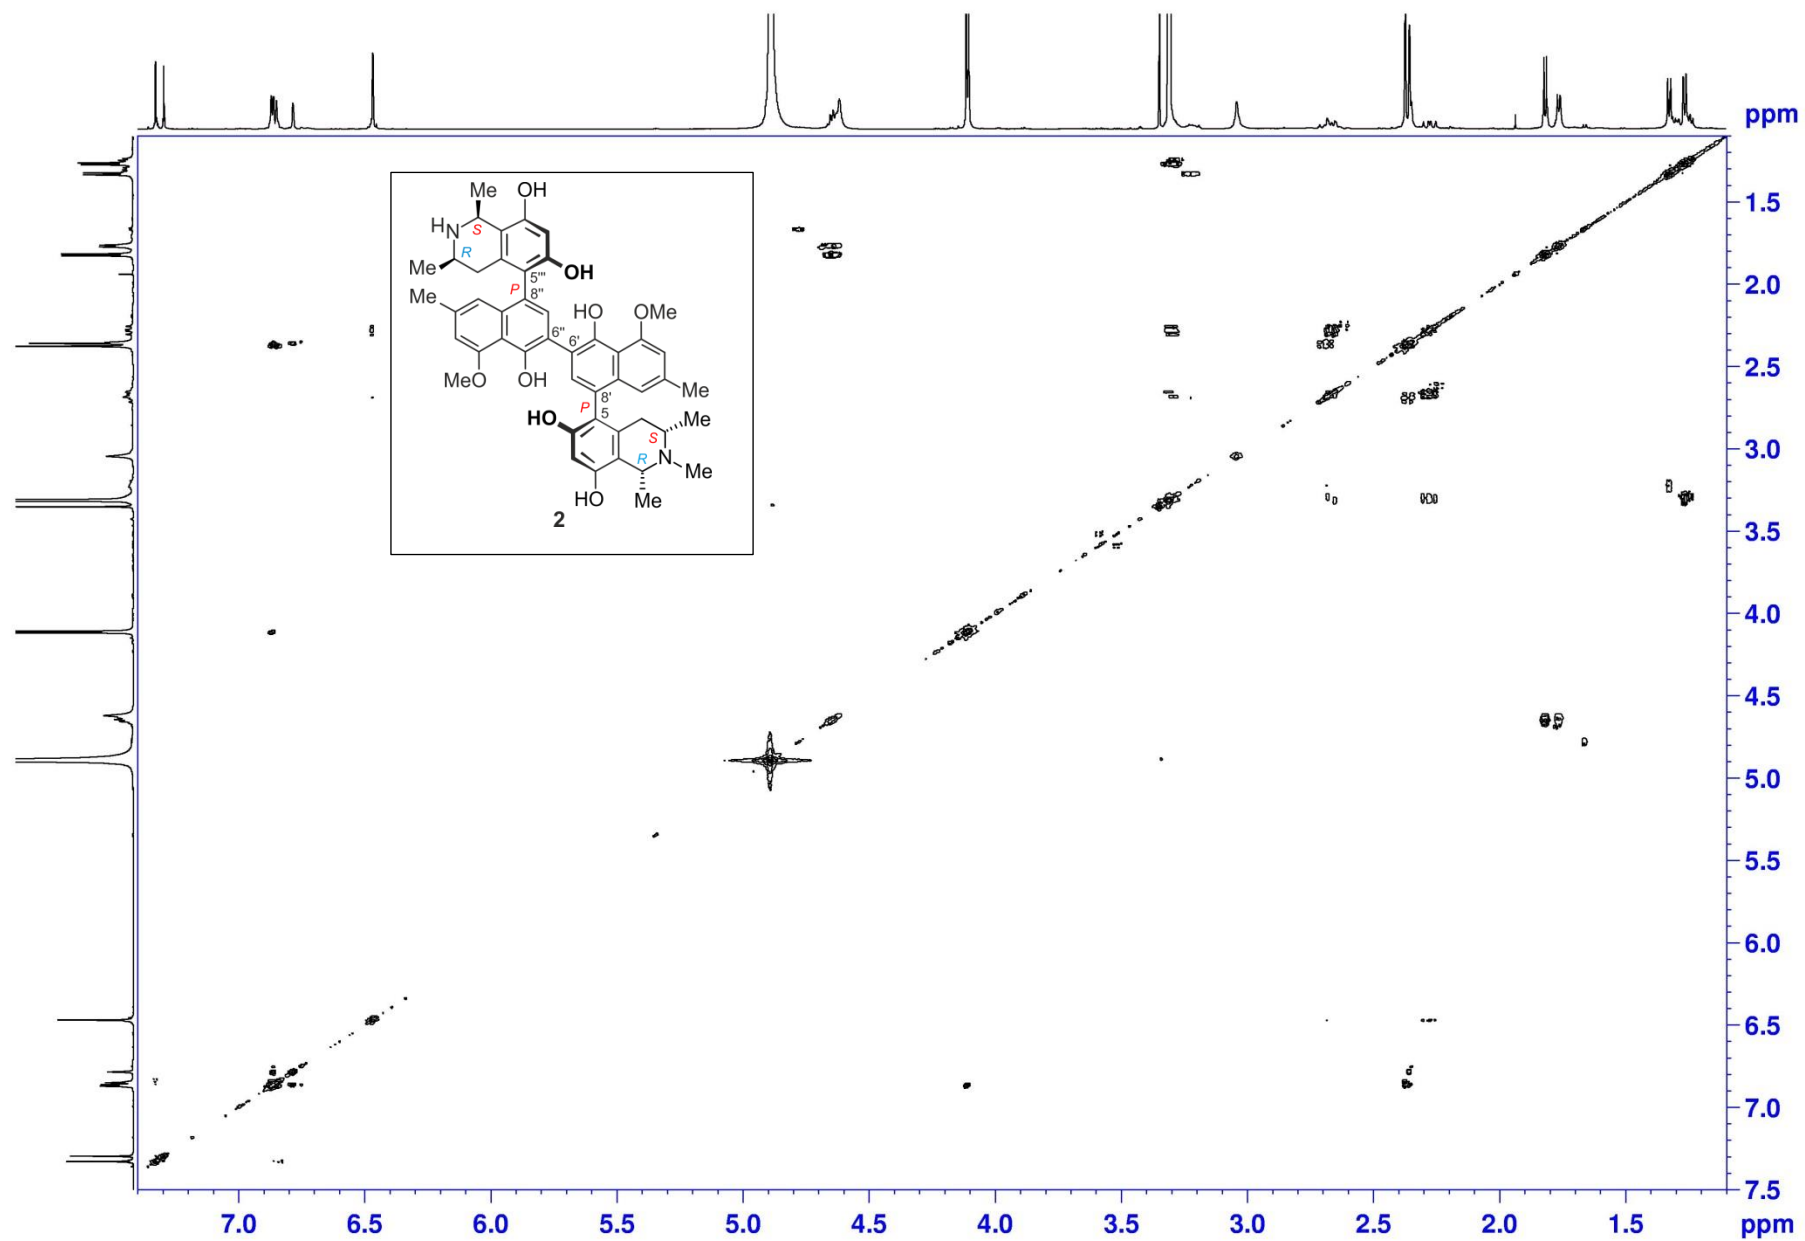

**Fig. S17** COSY NMR spectrum of compound **2** in methanol- $d_4$

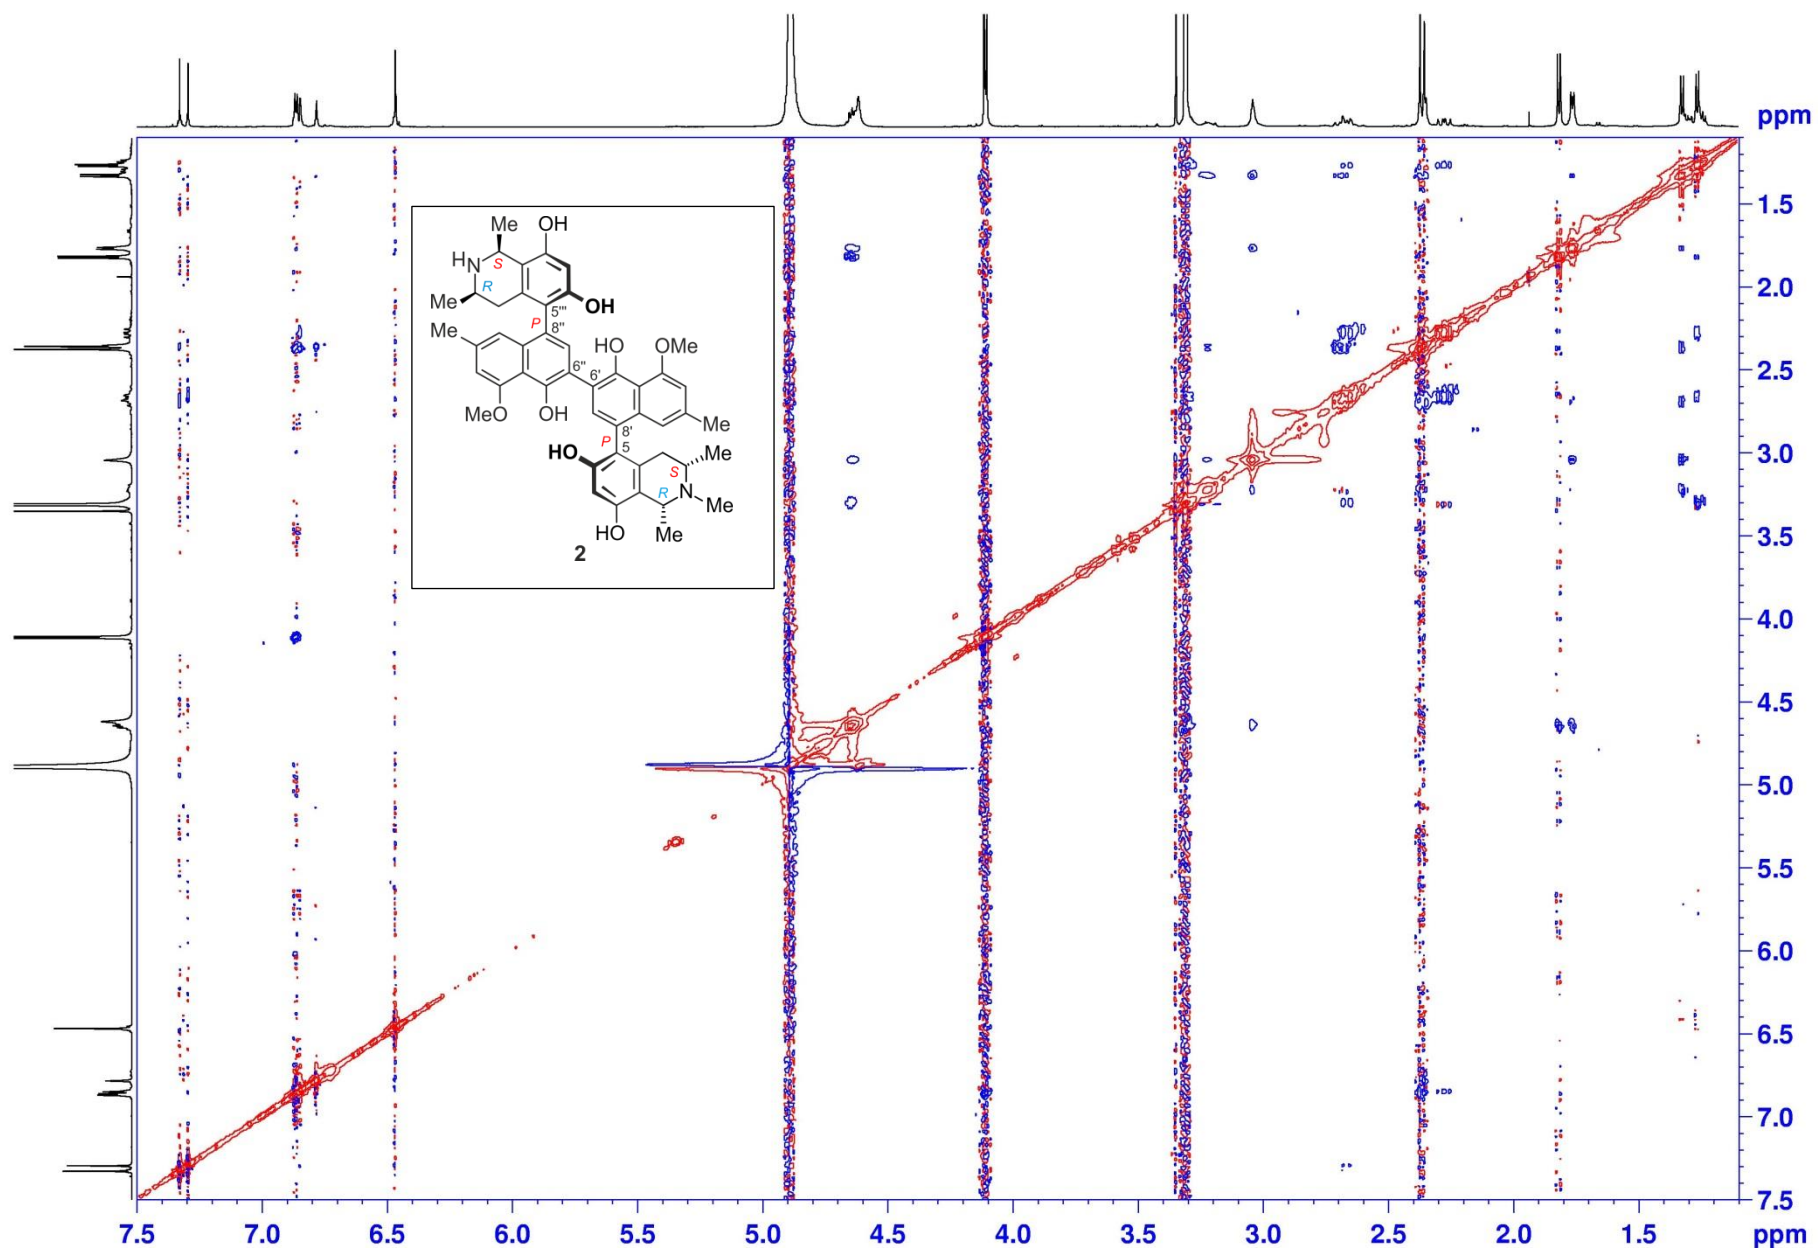

Fig. S18 ROESY NMR spectrum of compound **2** in methanol- $d_4$

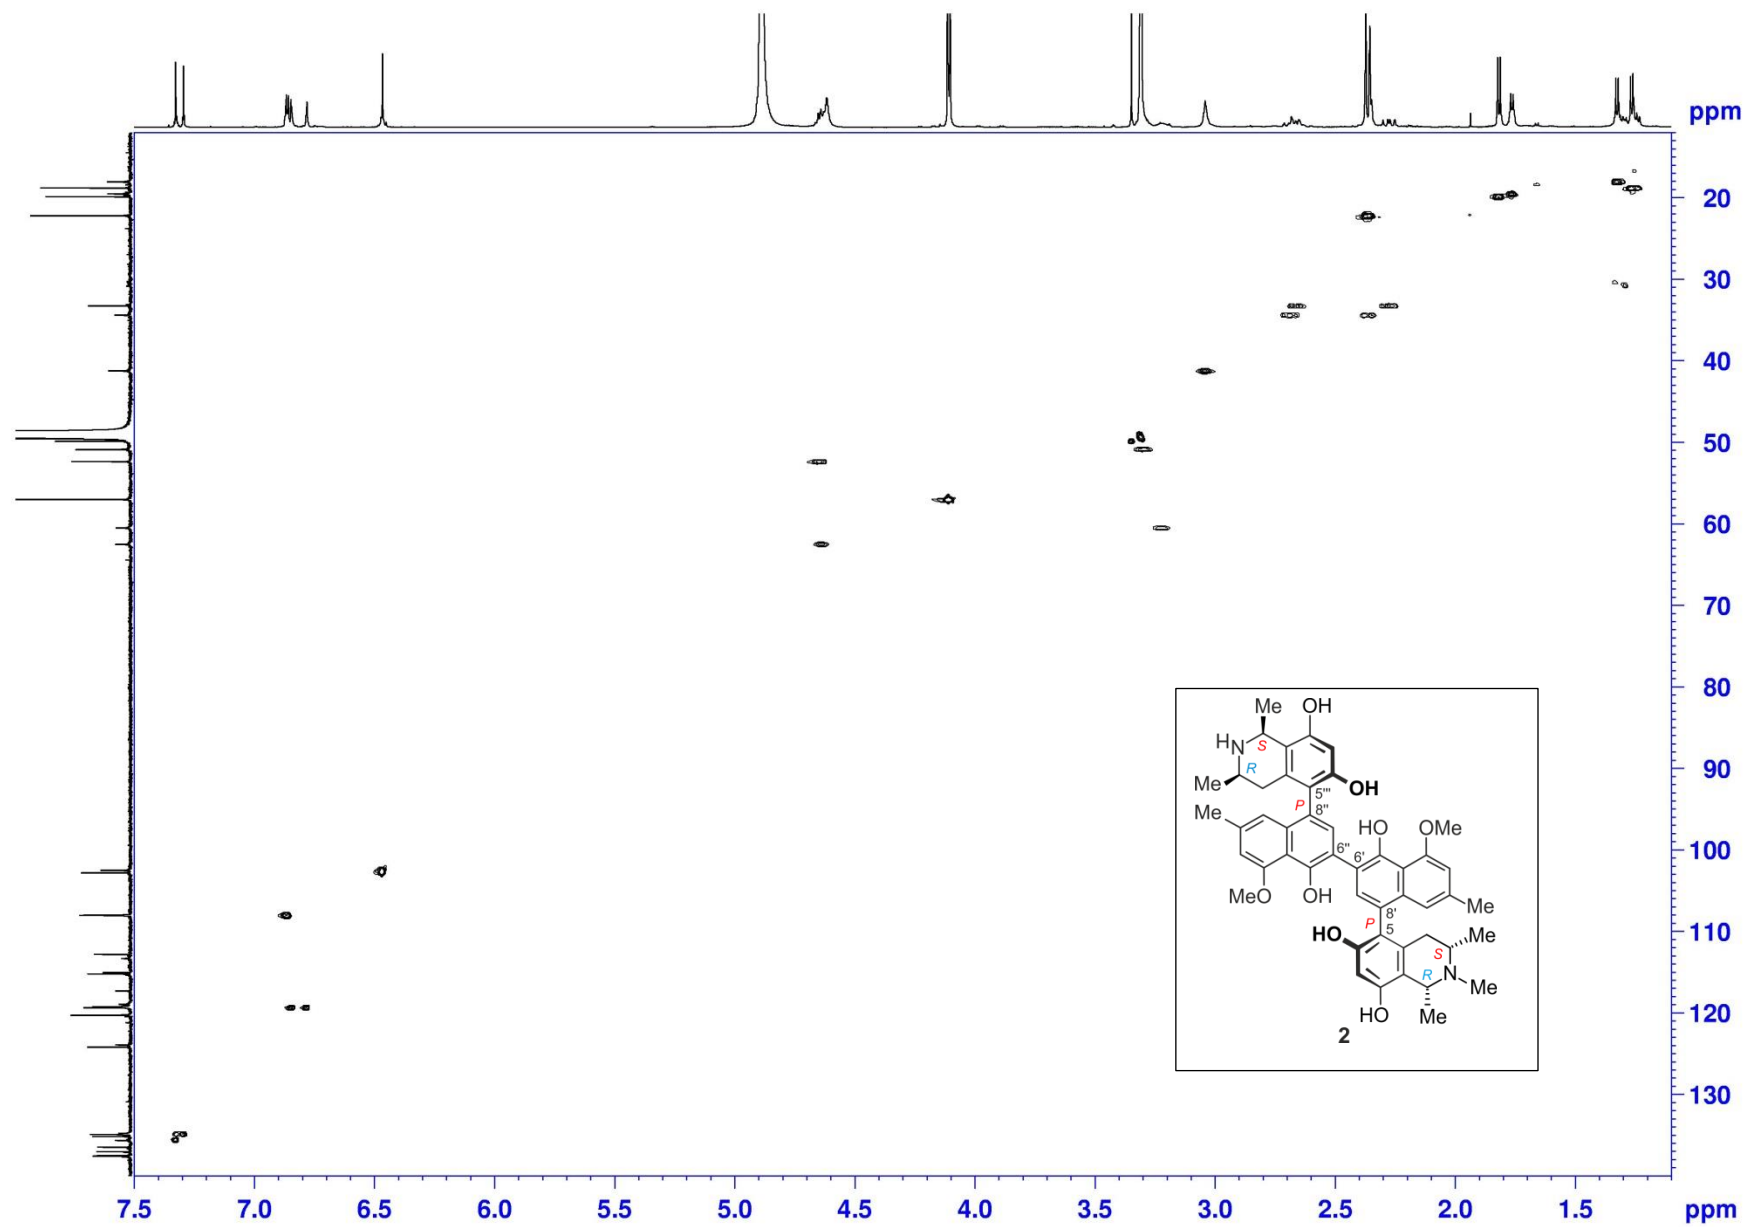

**Fig. S19** HSQC NMR spectrum of compound **2** in methanol- $d_4$

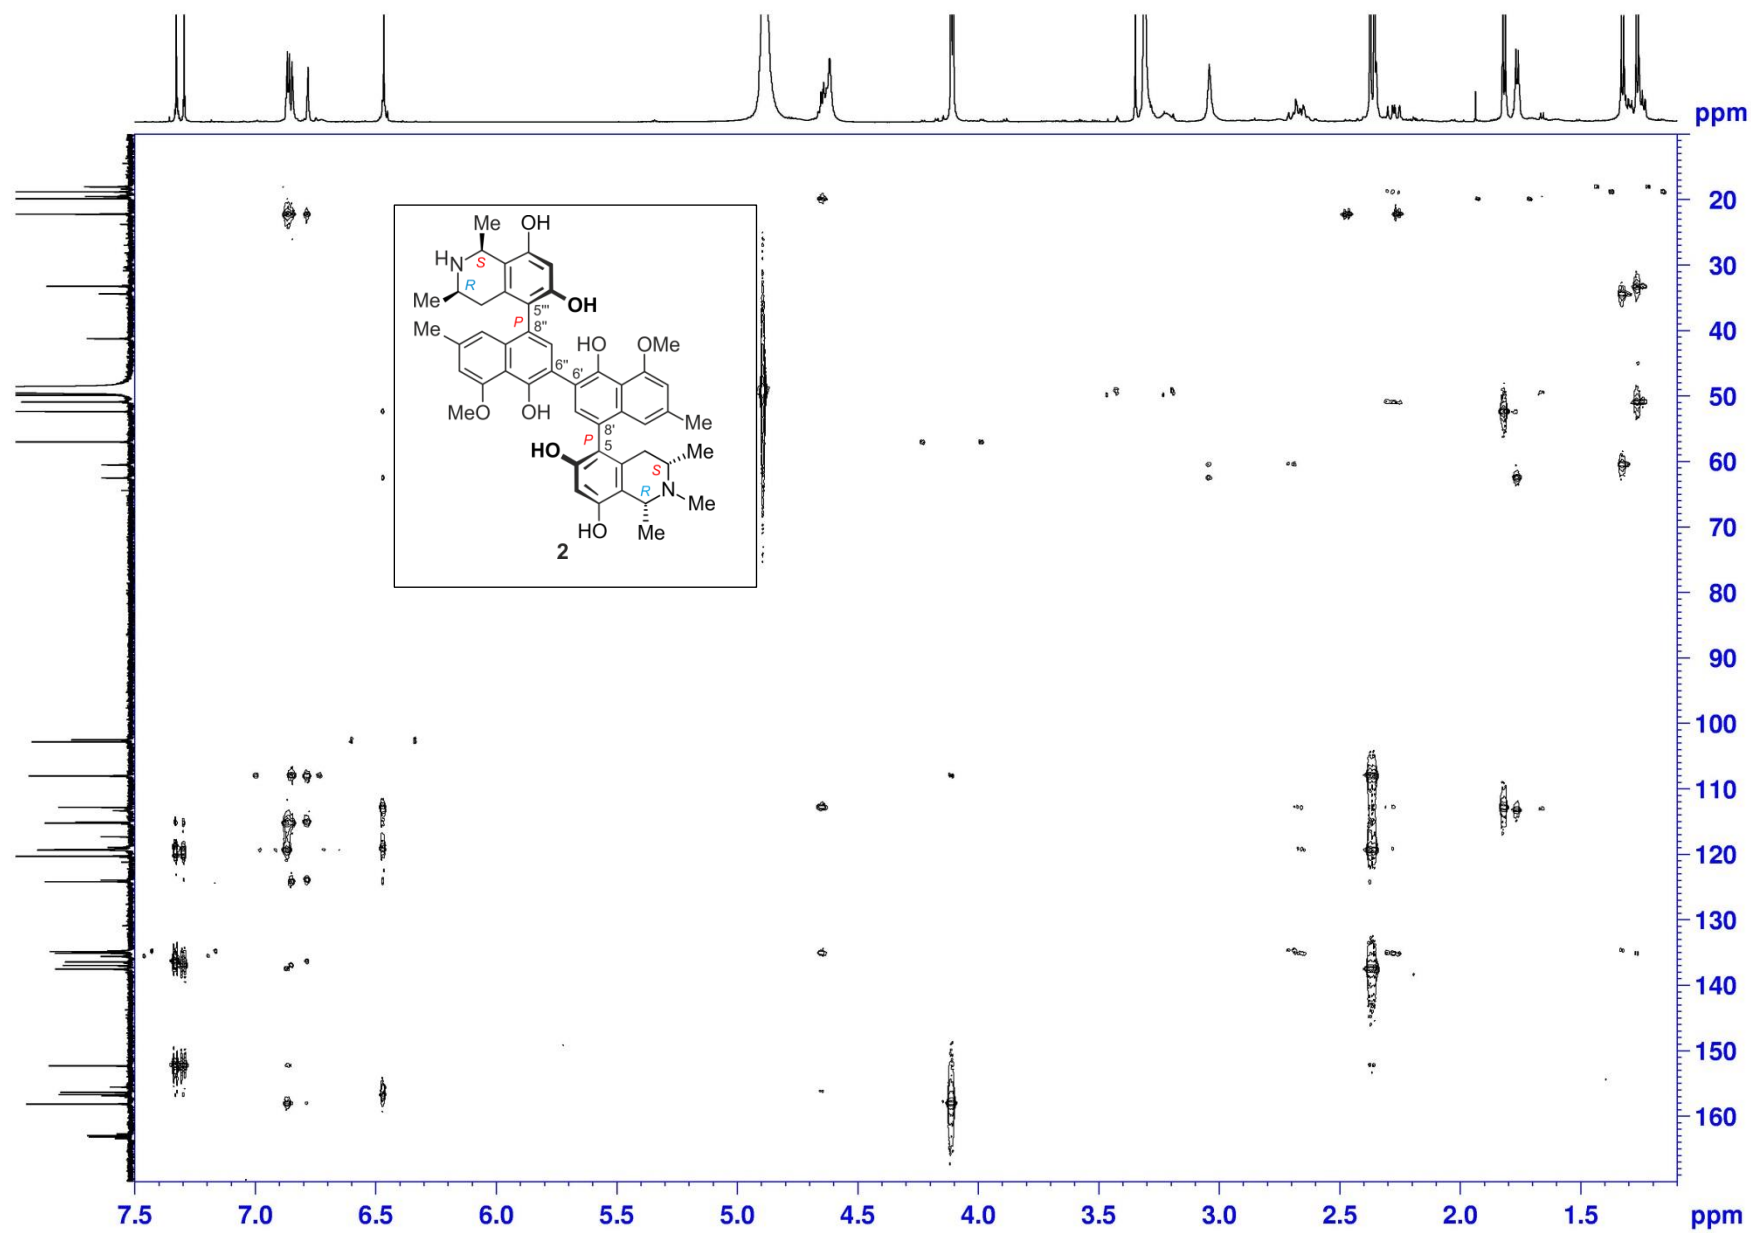

Fig. S20 HMBC NMR spectrum of compound **2** in methanol-*d*<sub>4</sub>

## Mass Spectrum Molecular Formula Report

## Analysis Info

Analysis Name D:\Data\Spektren2015\2015\_2655\_BRI.d  
 Method esi\_tune\_pos\_wide.m  
 Comment Blaise Kimbadi Lombe  
 B03-H2O-~~3~~  
 8 pmol/ $\mu$ l in MeOH

Acquisition Date 17.12.2015 14:43:32  
 Operator Administrator  
 Instrument micrOTOF 88

## Acquisition Parameter

|             |          |                |          |                    |        |
|-------------|----------|----------------|----------|--------------------|--------|
| Source Type | ESI      | Ion Polarity   | Positive | Set Corrector Fill | 48 V   |
| Scan Range  | n/a      | Capillary Exit | 280.0 V  | Set Pulsar Pull    | 804 V  |
| Scan Begin  | 50 m/z   | Hexapole RF    | 480.0 V  | Set Pulsar Push    | 807 V  |
| Scan End    | 3500 m/z | Skimmer 1      | 50.0 V   | Set Reflector      | 1700 V |
|             |          | Hexapole 1     | 23.0 V   | Set Flight Tube    | 8600 V |
|             |          |                |          | Set Detector TOF   | 2240 V |

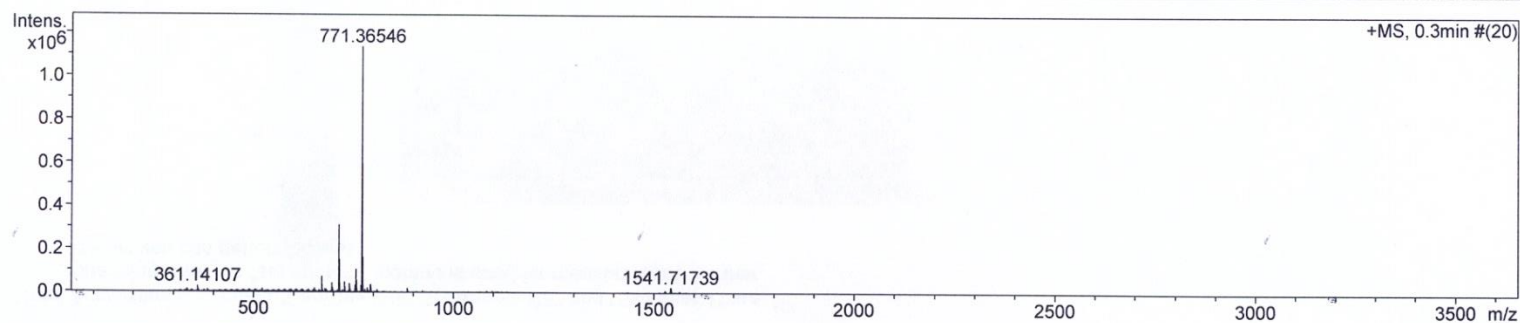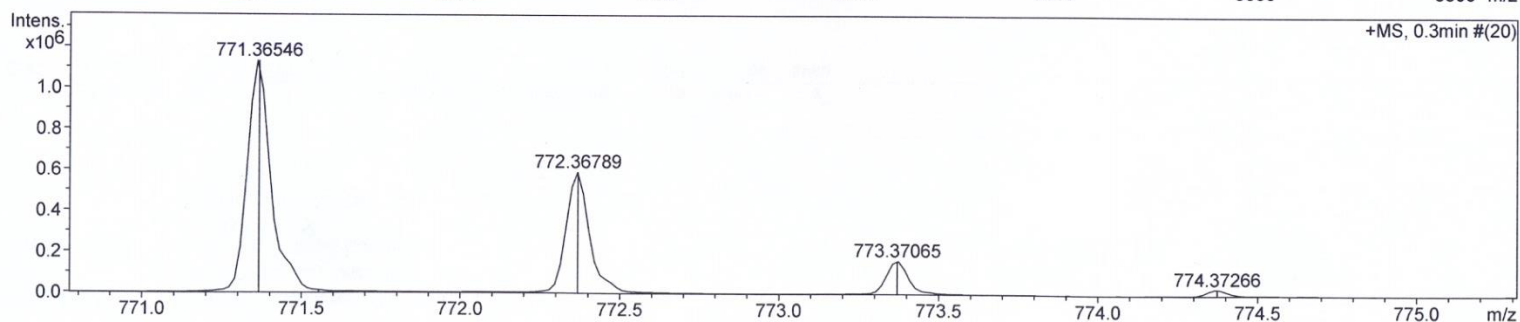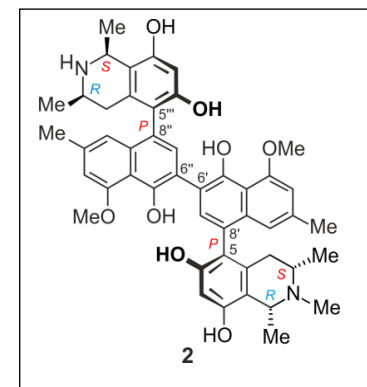

| Sum Formula       | Sigma | m/z       | Err [ppm] | Mean Err [ppm] | rdb   | N Rule | e <sup>-</sup> |
|-------------------|-------|-----------|-----------|----------------|-------|--------|----------------|
| C 47 H 51 N 2 O 8 | 0.01  | 771.36399 | -1.90     | -1.34          | 23.50 | ok     | even           |

Fig. S21 HRESIMS spectrum of compound 2

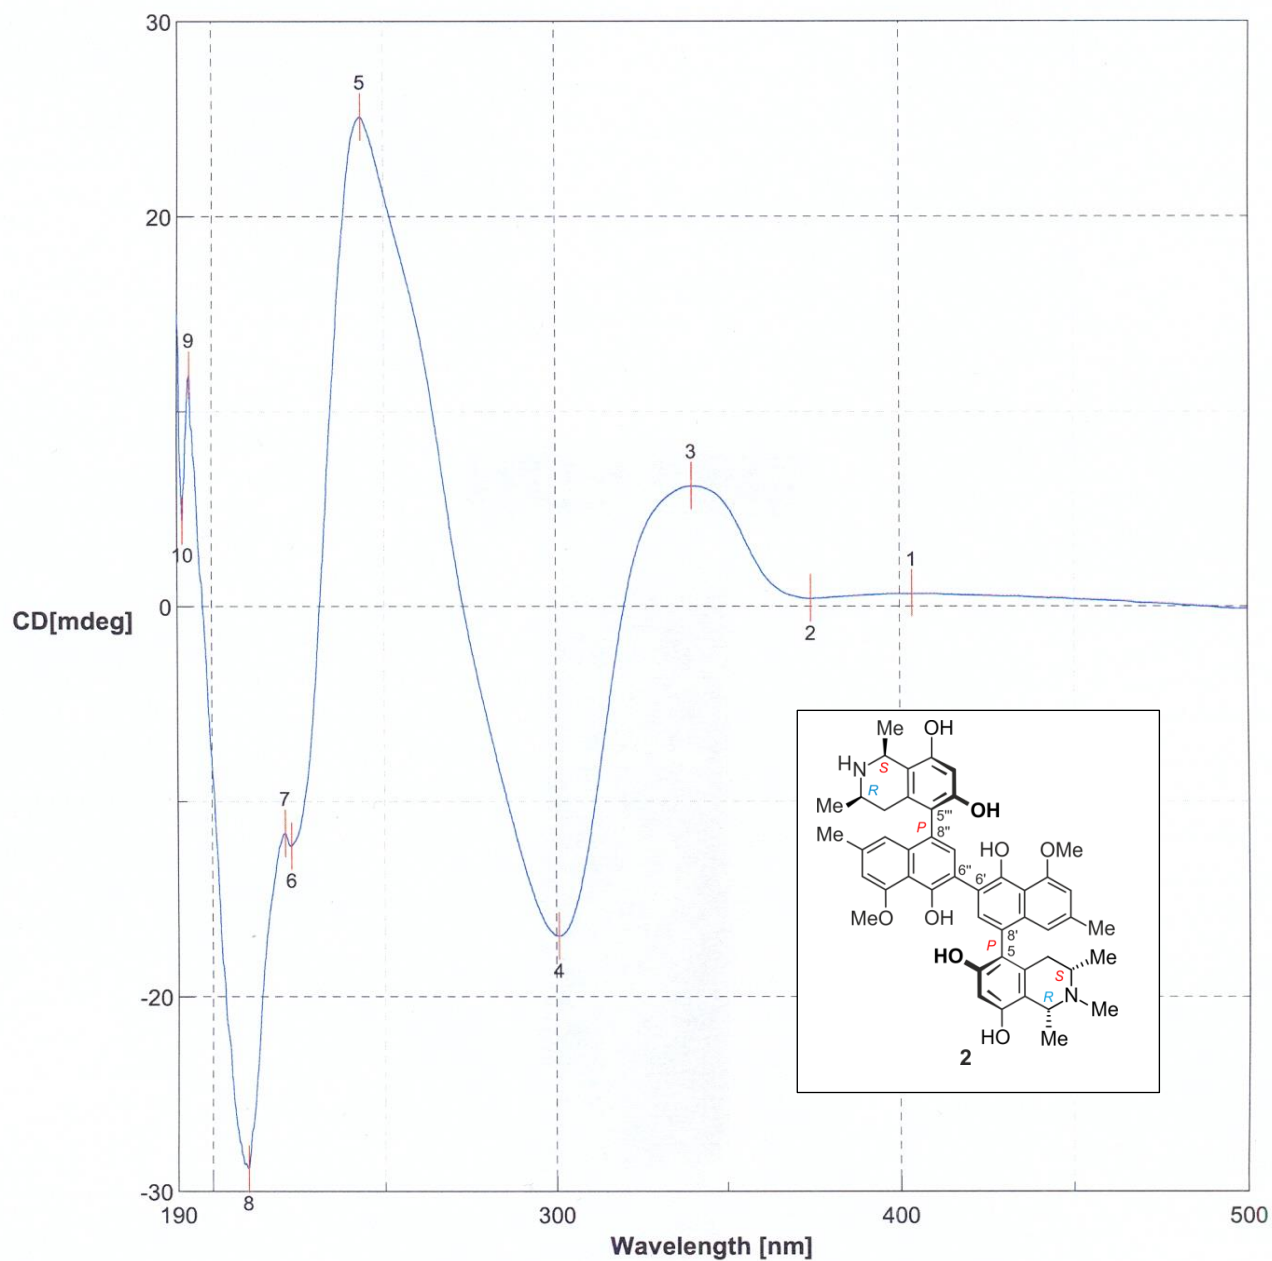

Date/Time 02.02.2016 15:40  
 Operator Kimbadi  
 File Name BO3-H2O-5#001.jws  
 Sample Name BO3-H2O-5  
 Comment offline

| No. | nm    | CD[mdeg] | No. | nm    | CD[mdeg] | No. | nm    | CD[mdeg] |
|-----|-------|----------|-----|-------|----------|-----|-------|----------|
| 1   | 403.5 | 0.655446 | 2   | 374.3 | 0.40599  | 3   | 339.7 | 6.18278  |
| 4   | 300.7 | -16.9044 | 5   | 243.3 | 25.0888  | 6   | 222.9 | -12.2832 |
| 7   | 221   | -11.6263 | 8   | 210.2 | -28.8258 | 9   | 193.4 | 11.8764  |
| 10  | 191.5 | 4.39749  |     |       |          |     |       |          |

Fig. S22 CD spectrum of compound 2 in methanol

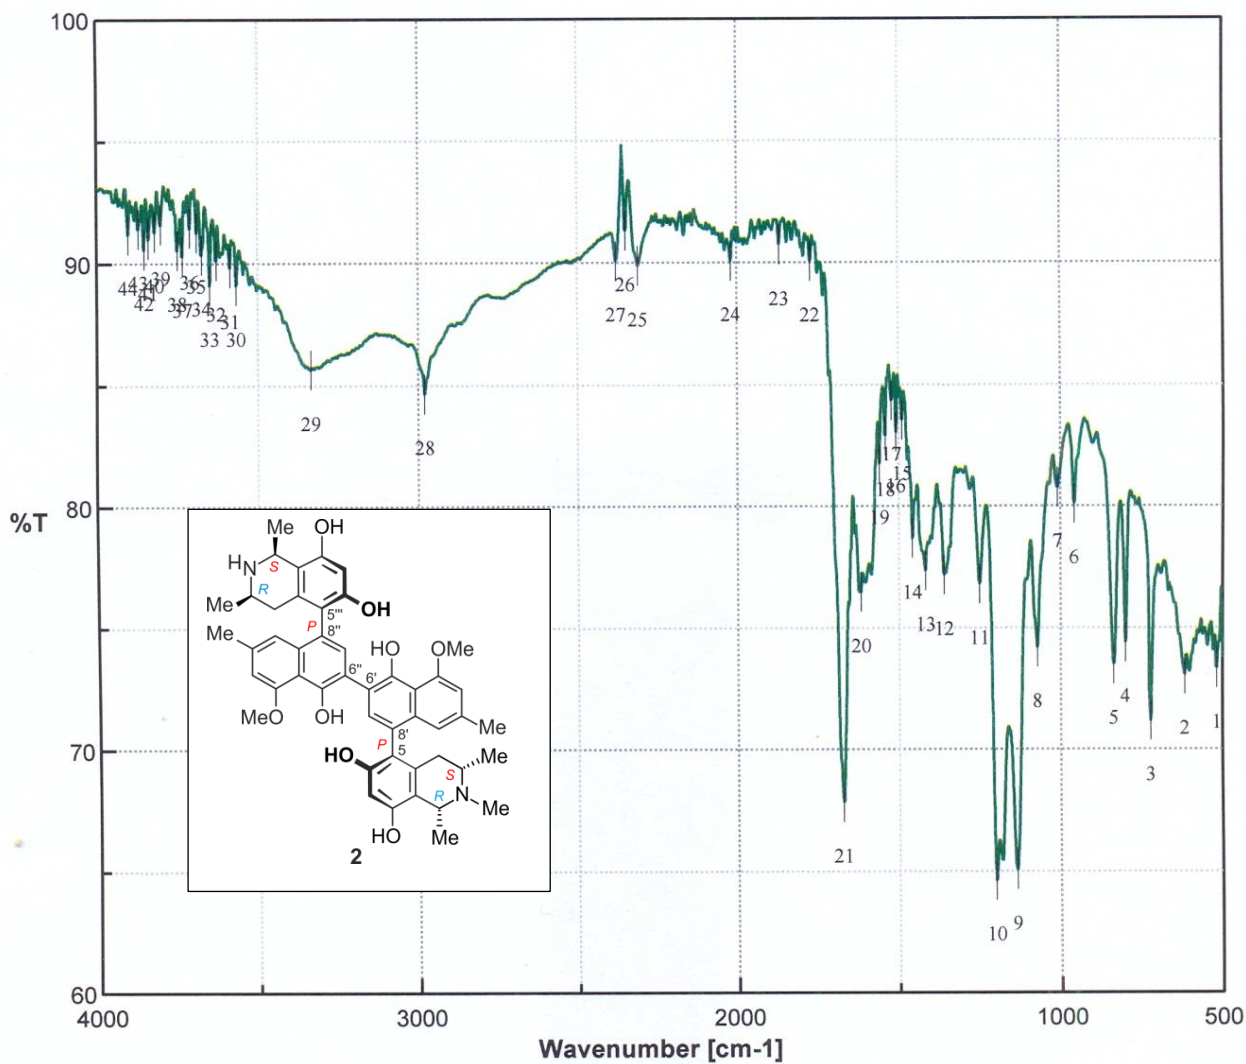

| Results of Peak Find |          |           |     |          |           |
|----------------------|----------|-----------|-----|----------|-----------|
| No.                  | Position | Intensity | No. | Position | Intensity |
| 1                    | 517.793  | 73.3029   | 2   | 617.109  | 73.0542   |
| 3                    | 722.211  | 71.1573   | 4   | 800.314  | 74.3847   |
| 5                    | 836.955  | 73.472    | 6   | 957.484  | 80.0722   |
| 7                    | 1010.52  | 80.7374   | 8   | 1072.23  | 74.1811   |
| 9                    | 1136.83  | 65.0382   | 10  | 1200.47  | 64.5911   |
| 11                   | 1250.61  | 76.7915   | 12  | 1359.57  | 77.1416   |
| 13                   | 1418.39  | 77.3169   | 14  | 1456.96  | 78.6479   |
| 15                   | 1488.78  | 83.5136   | 16  | 1507.1   | 83.0143   |
| 17                   | 1520.6   | 84.3287   | 18  | 1540.85  | 82.8773   |
| 19                   | 1559.17  | 81.7209   | 20  | 1617.02  | 76.4555   |
| 21                   | 1671.98  | 67.8095   | 22  | 1771.3   | 90.0412   |
| 23                   | 1868.68  | 90.719    | 24  | 2019.1   | 90.0556   |
| 25                   | 2310.3   | 89.8648   | 26  | 2348.87  | 91.3138   |
| 27                   | 2378.76  | 90.0698   | 28  | 2980.45  | 84.6094   |
| 29                   | 3335.28  | 85.6191   | 30  | 3566.7   | 89.0788   |
| 31                   | 3586.95  | 89.8216   | 32  | 3628.41  | 90.1109   |
| 33                   | 3648.66  | 89.0997   | 34  | 3674.69  | 90.3252   |
| 35                   | 3689.16  | 91.2494   | 36  | 3711.33  | 91.4469   |
| 37                   | 3734.48  | 90.2764   | 38  | 3749.9   | 90.5335   |
| 39                   | 3801.01  | 91.5978   | 40  | 3820.29  | 91.2772   |
| 41                   | 3838.61  | 90.9839   | 42  | 3853.08  | 90.5647   |
| 43                   | 3870.43  | 91.3998   | 44  | 3902.25  | 91.1807   |

| [Comments]                |                  |
|---------------------------|------------------|
| Sample name               | BO3-H2O-5        |
| Comment                   | drop(MeOH)       |
| User                      | Kimbadi          |
| Division                  | AK Bringmann     |
| Company                   | Uni Würzburg     |
| [Measurement Information] |                  |
| Model Name                | FT/IR-4600typeA  |
| Serial Number             | D063461786       |
| Accessory                 | ATR PRO ONE      |
| Accessory S/N             | A070661809       |
| Incident angle            | 45 deg           |
| Measurement Date          | 20.12.2017 15:03 |
| Light Source              | Standard         |
| Detector                  | TGS              |
| Accumulation              | 16               |
| Resolution                | 4 cm-1           |
| Zero Filling              | On               |
| Apodization               | Cosine           |
| Gain                      | Auto (4)         |
| Aperture                  | Auto (7.1 mm)    |
| Scanning Speed            | Auto (2 mm/sec)  |
| Filter                    | Auto (30000 Hz)  |

Fig. S23 IR spectrum of compound 2



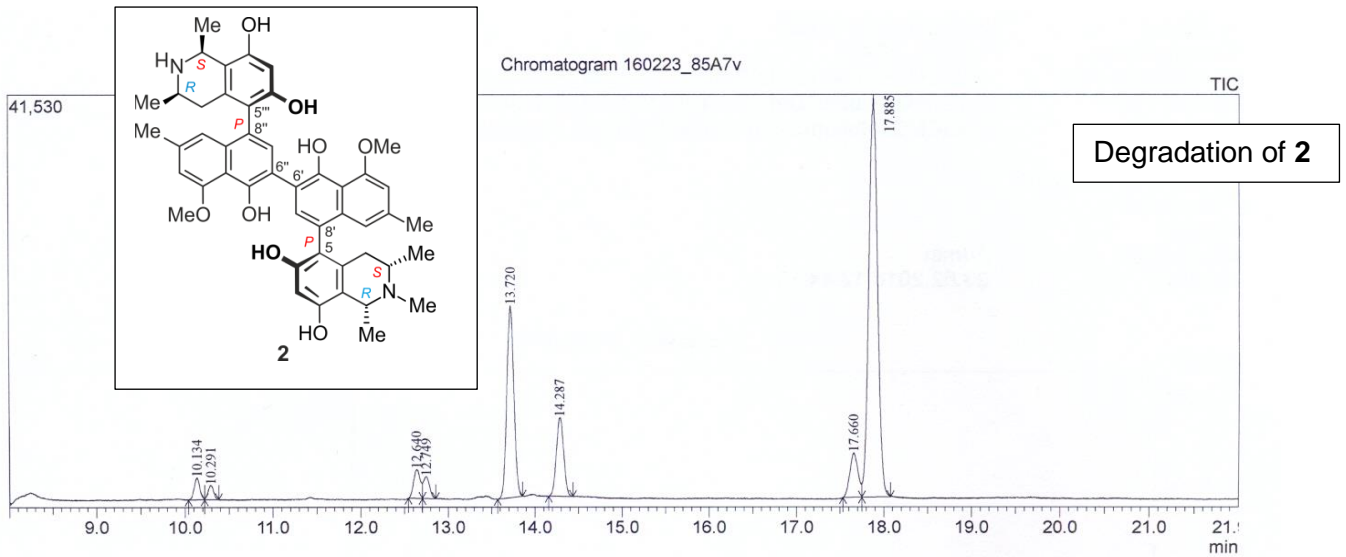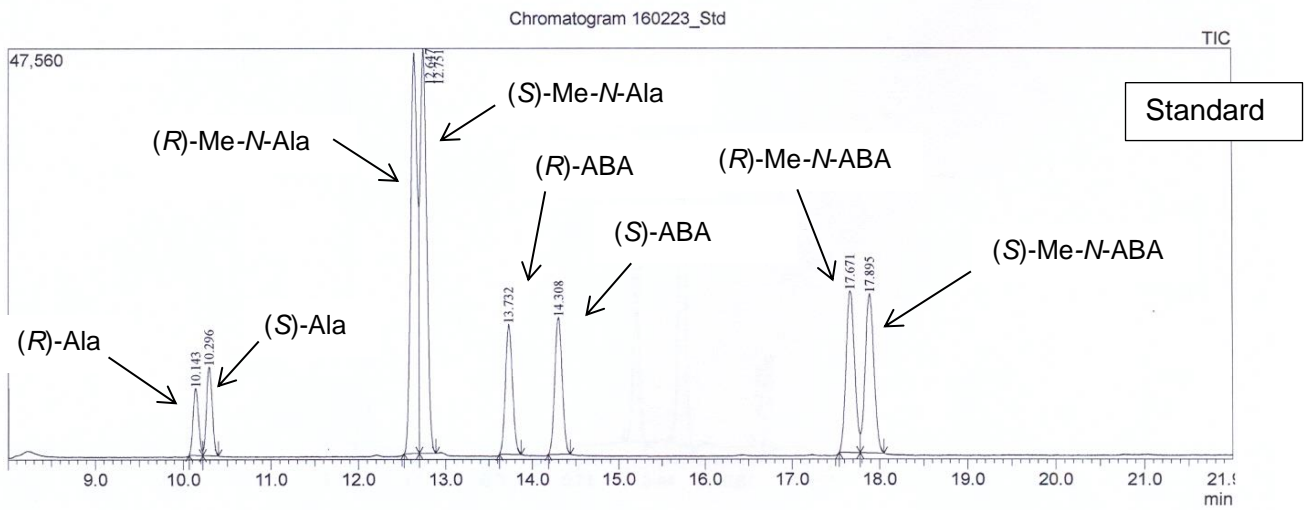

Where: Ala = alanine; Me-N-Ala = N-methylalanine;  
 ABA = 3-aminobutyric acid; Me-N-ABA = N-methyl 3-aminobutyric acid

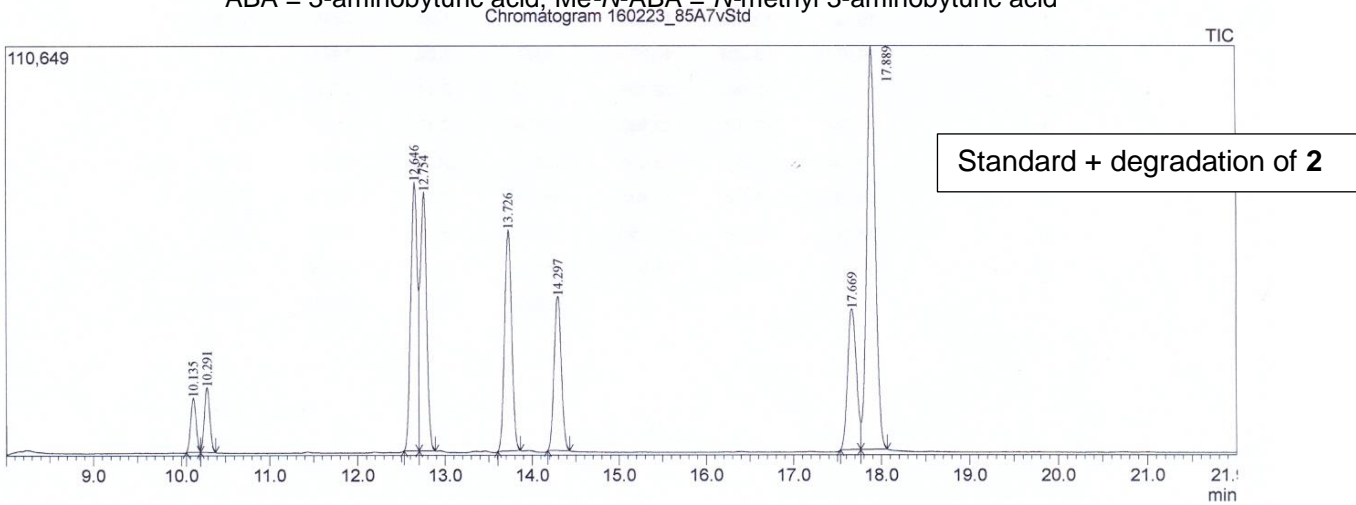

**Fig. S24** Results of the oxidative degradation of compound **2**

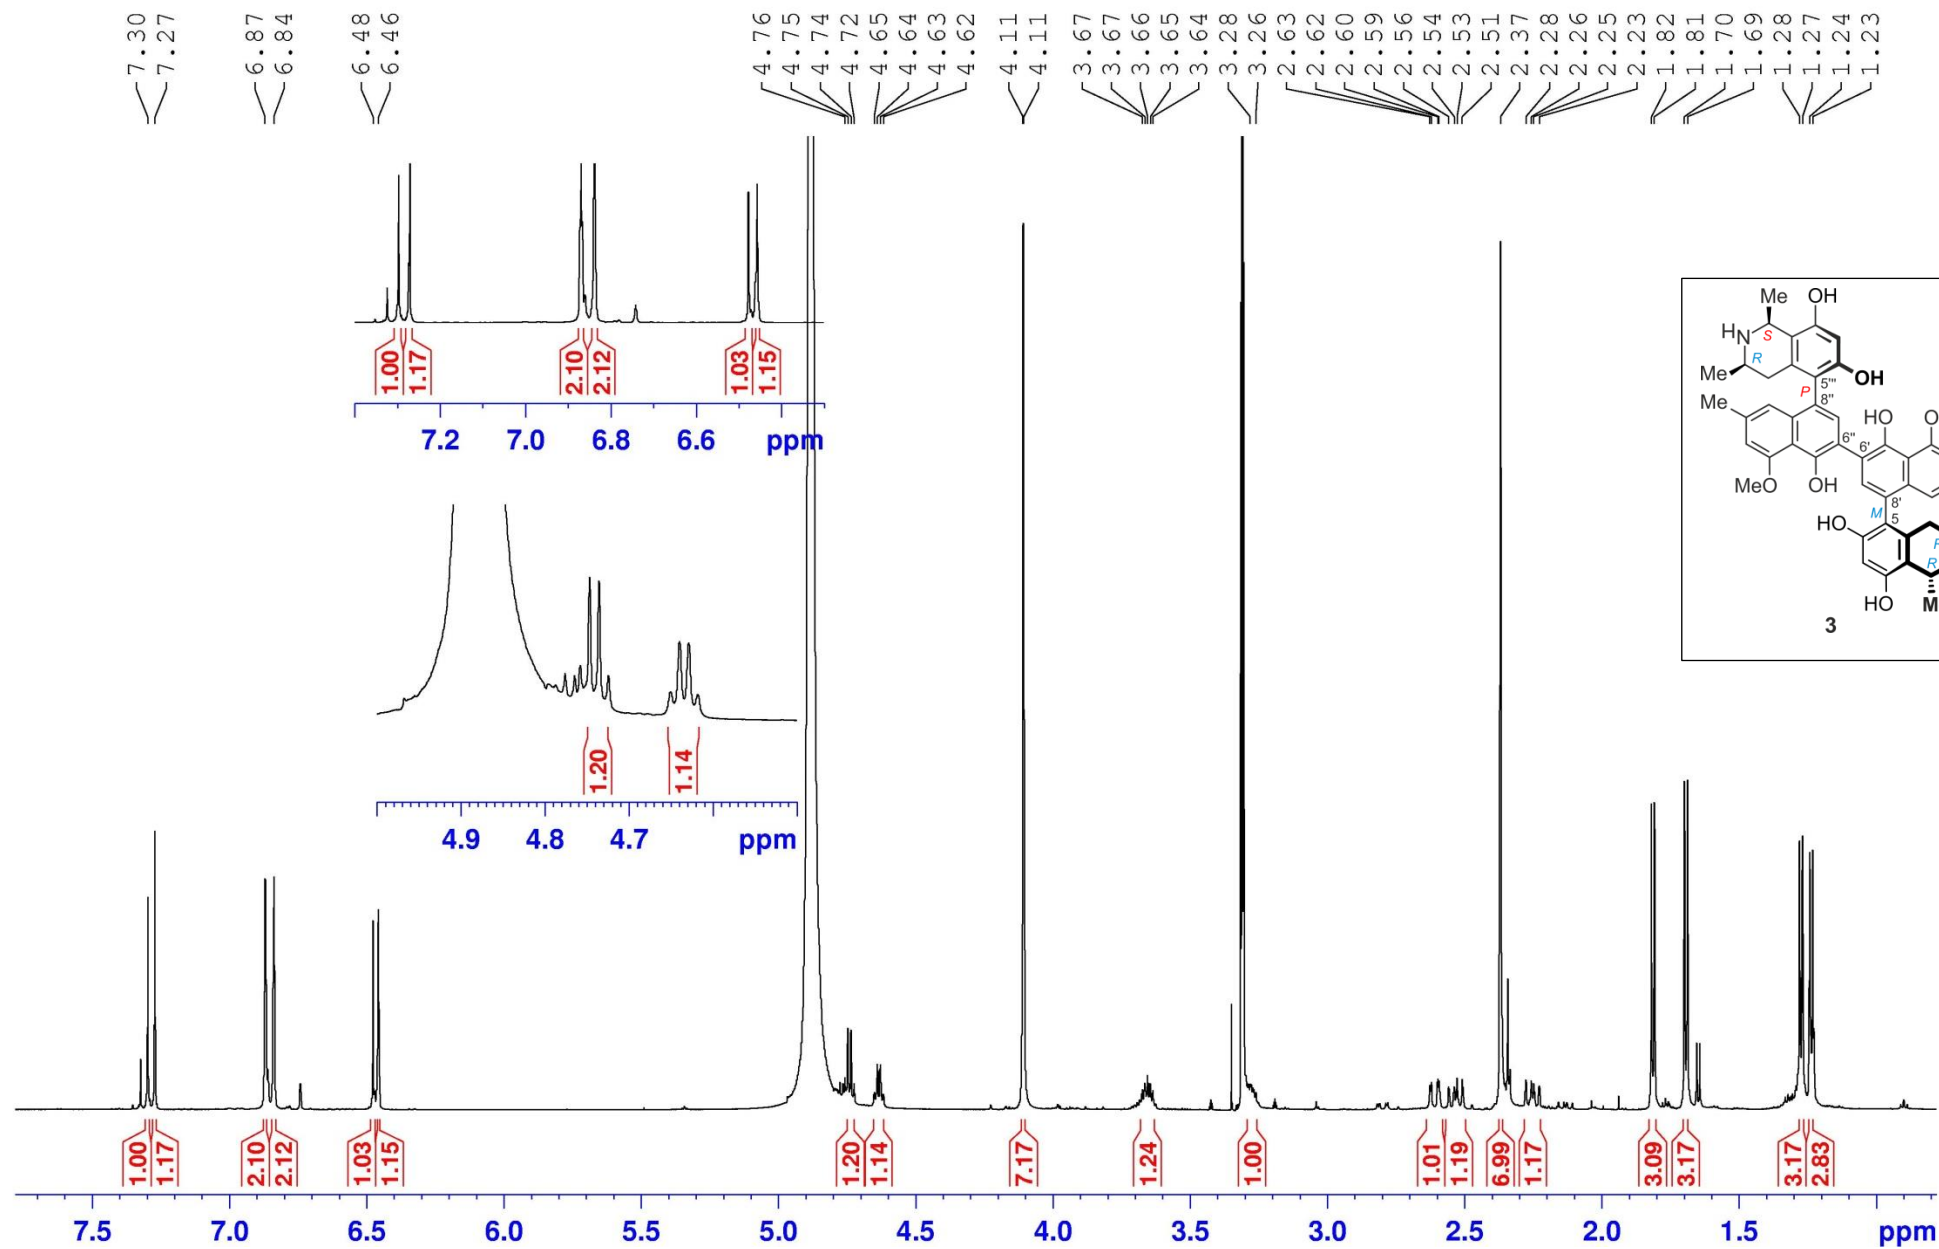

Fig. S25  $^1\text{H}$  NMR spectrum of compound **3** in methanol- $d_4$

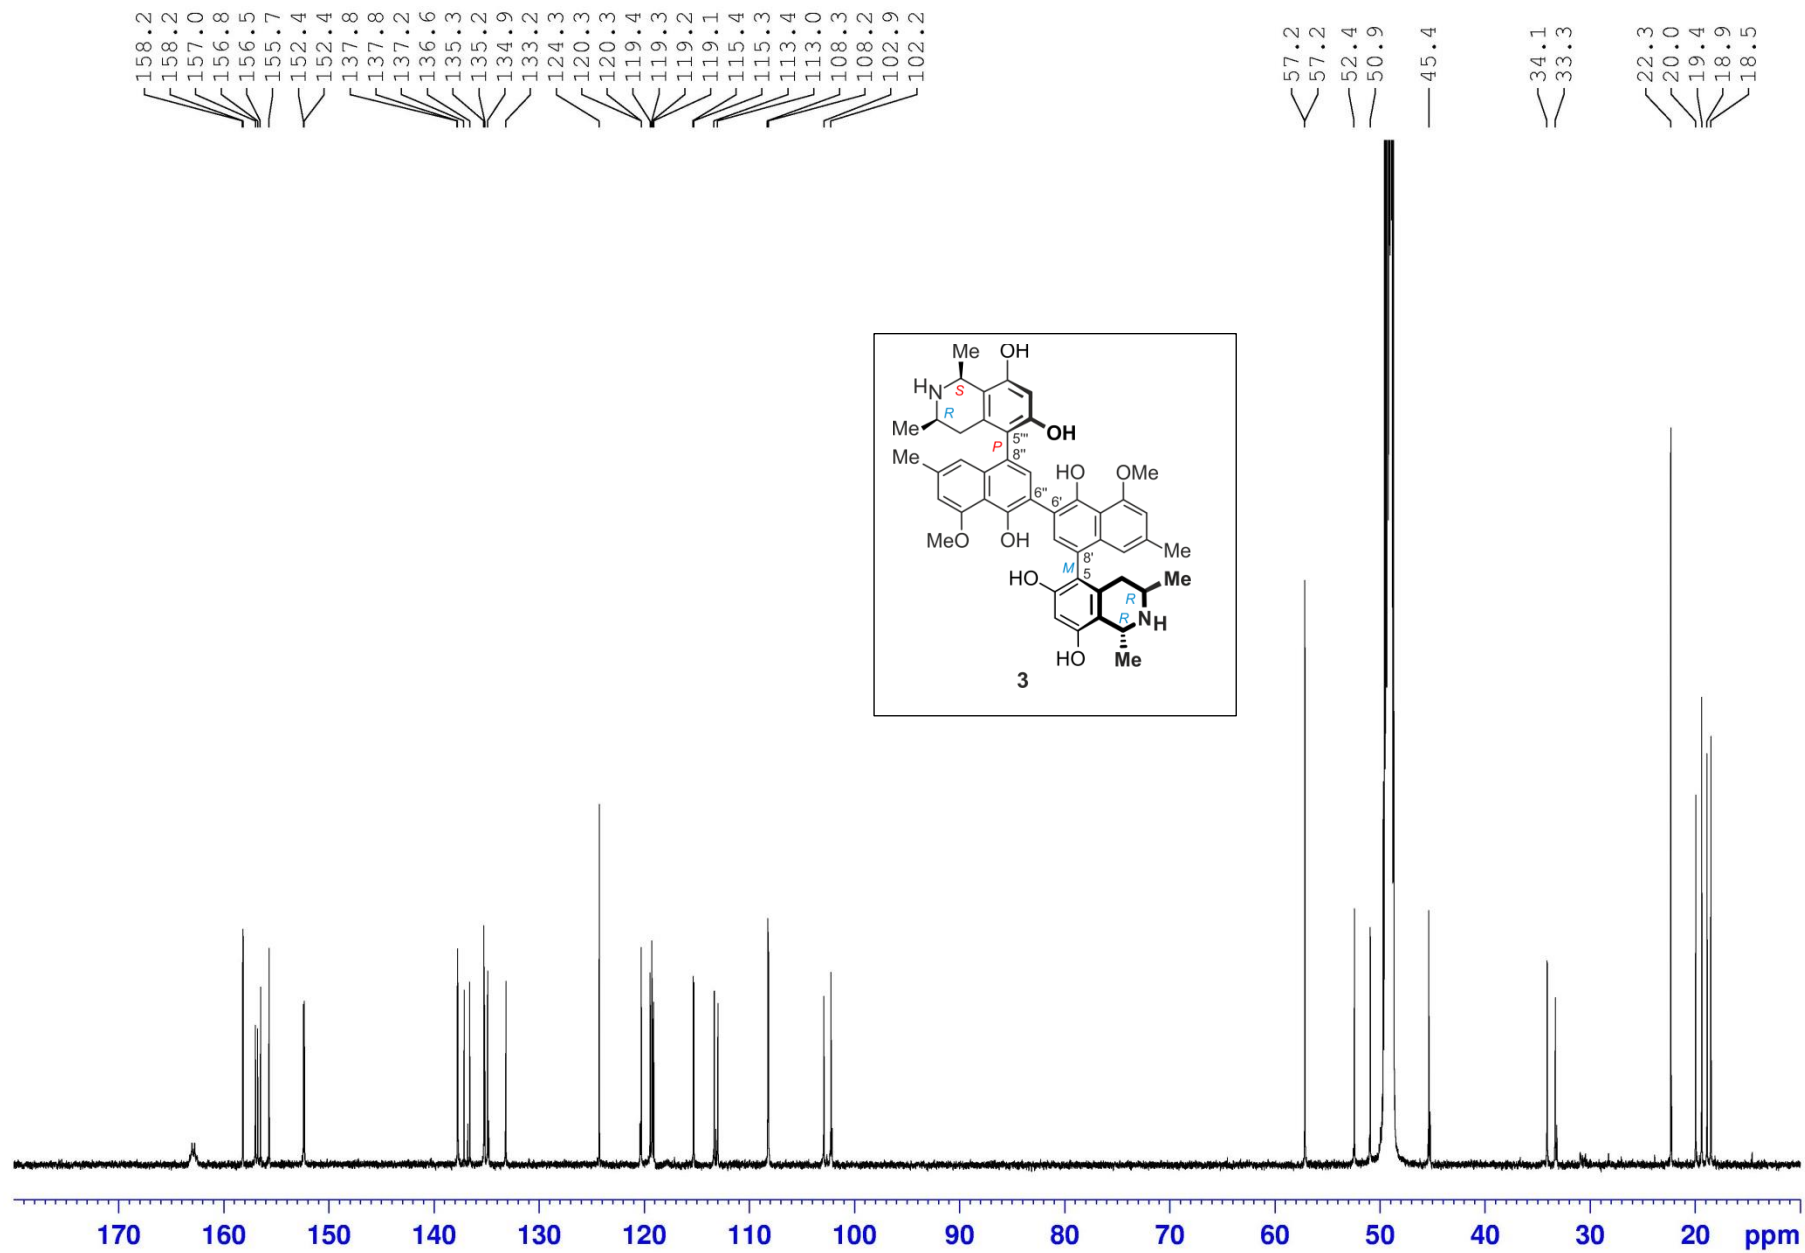

**Fig. S26**  $^{13}\text{C}$  NMR spectrum of compound **3** in methanol- $d_4$

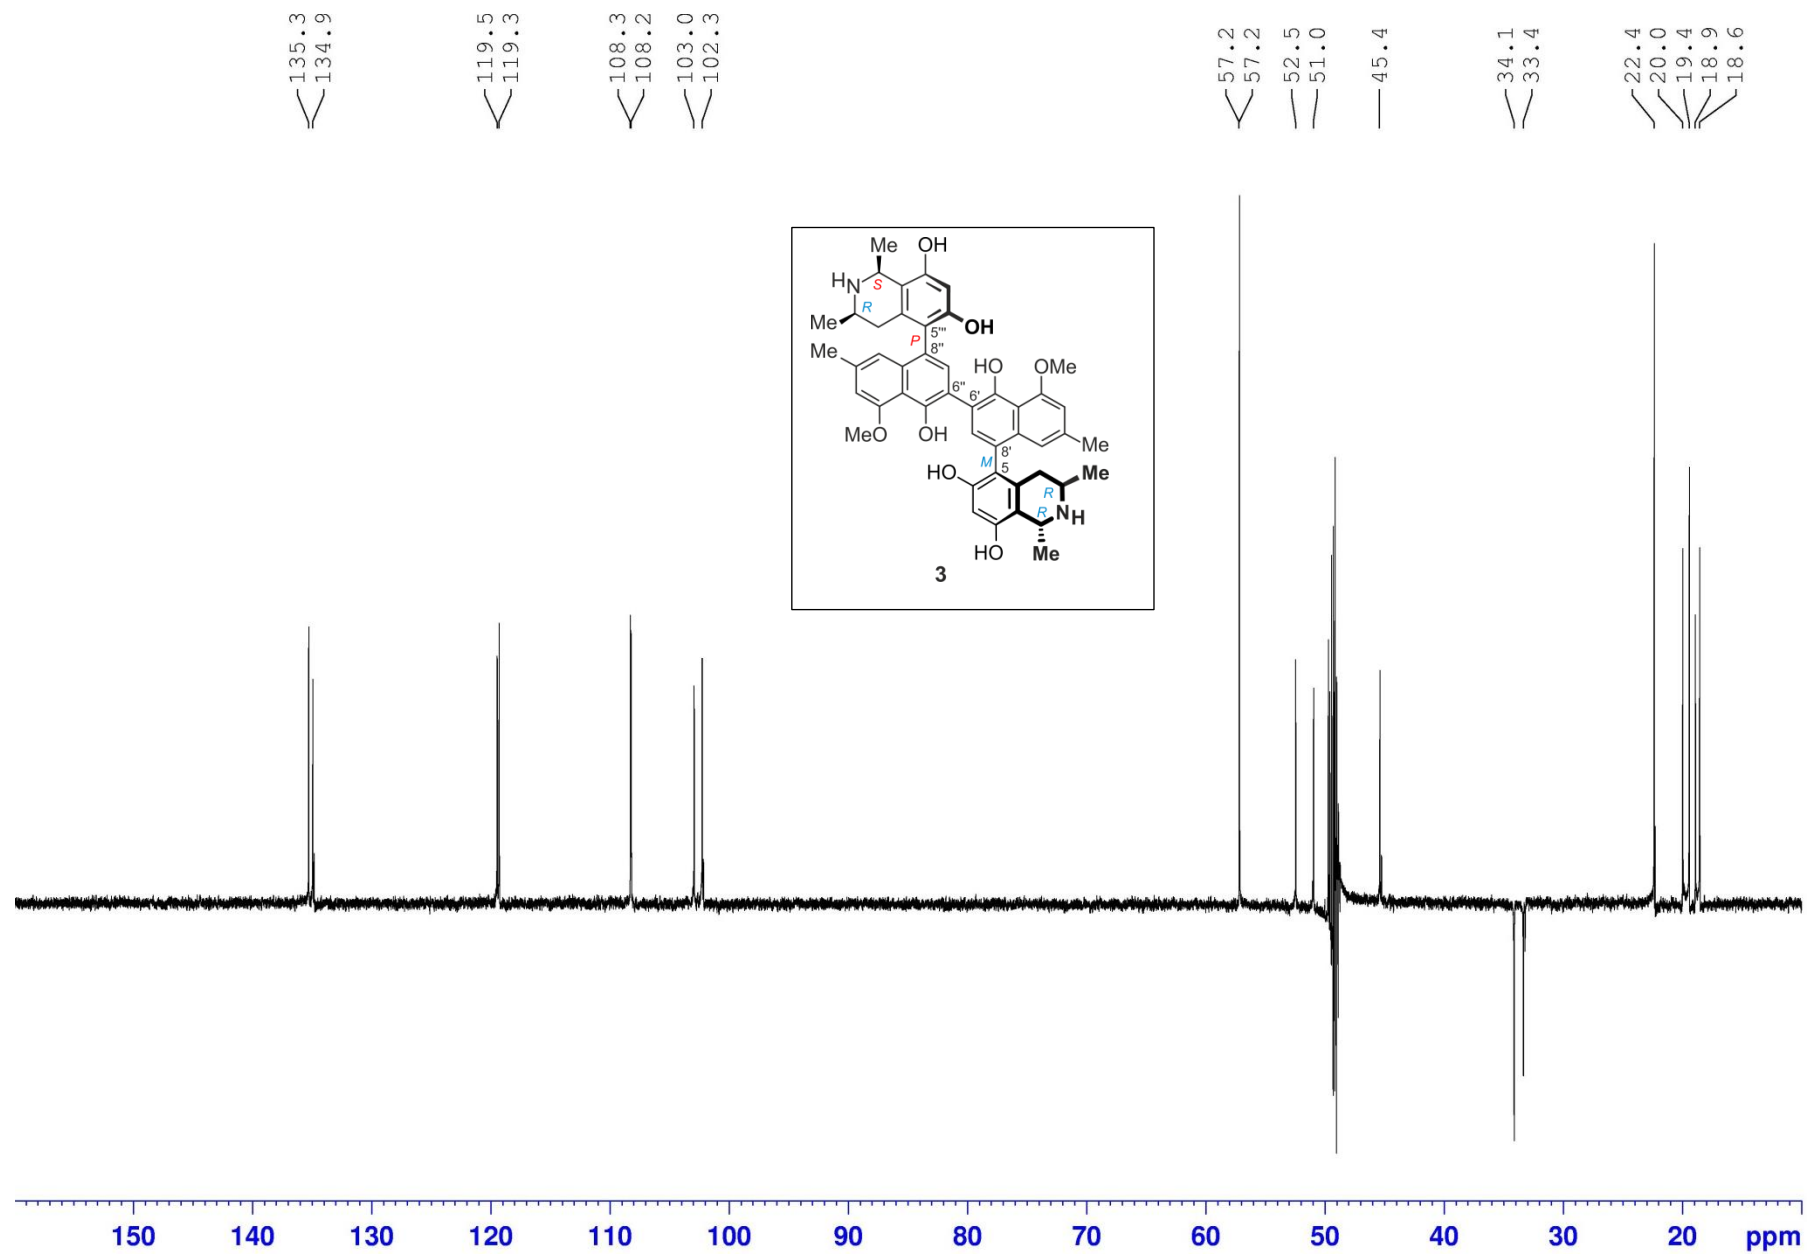

Fig. S27 DEPT-135 NMR spectrum of compound **3** in methanol- $d_4$

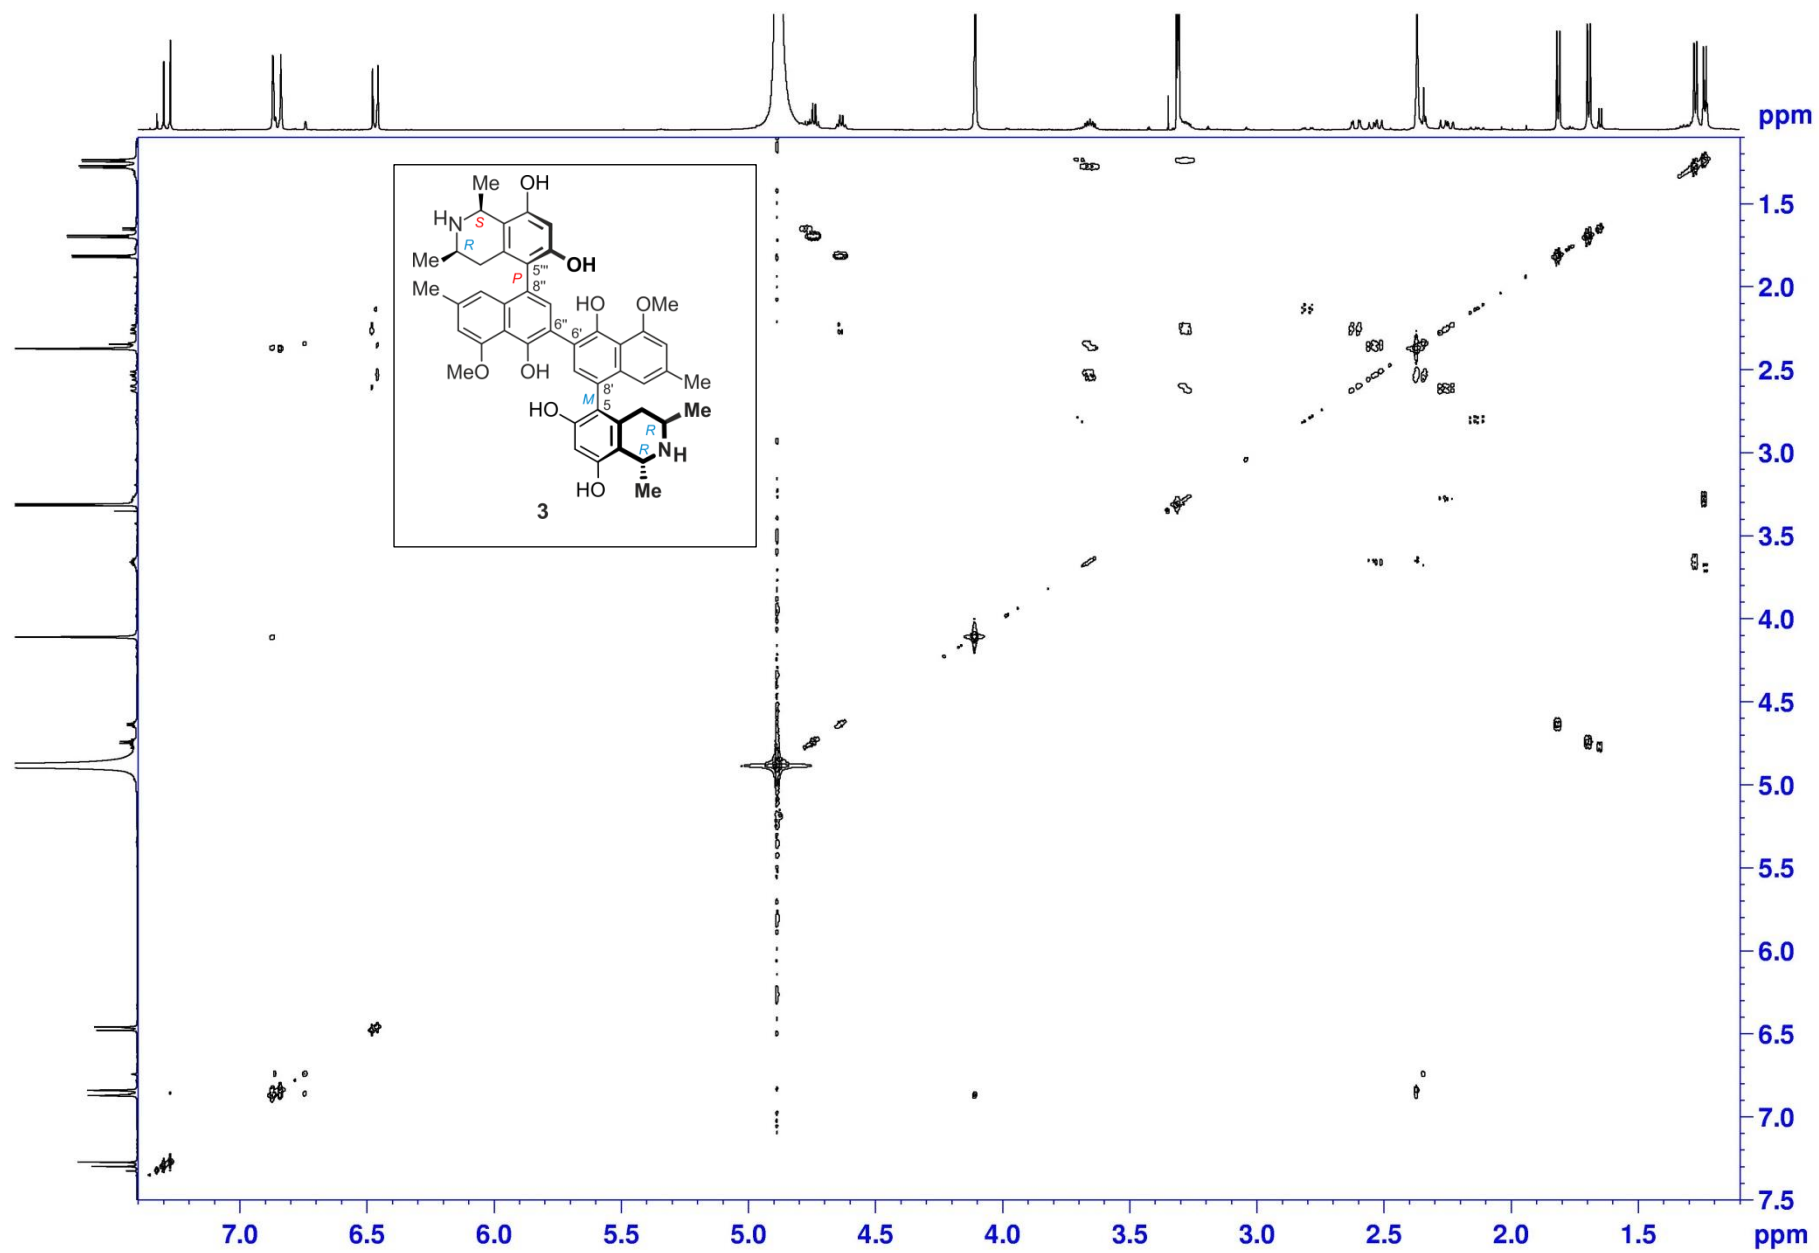

Fig. S28 COSY NMR spectrum of compound **3** in methanol- $d_4$

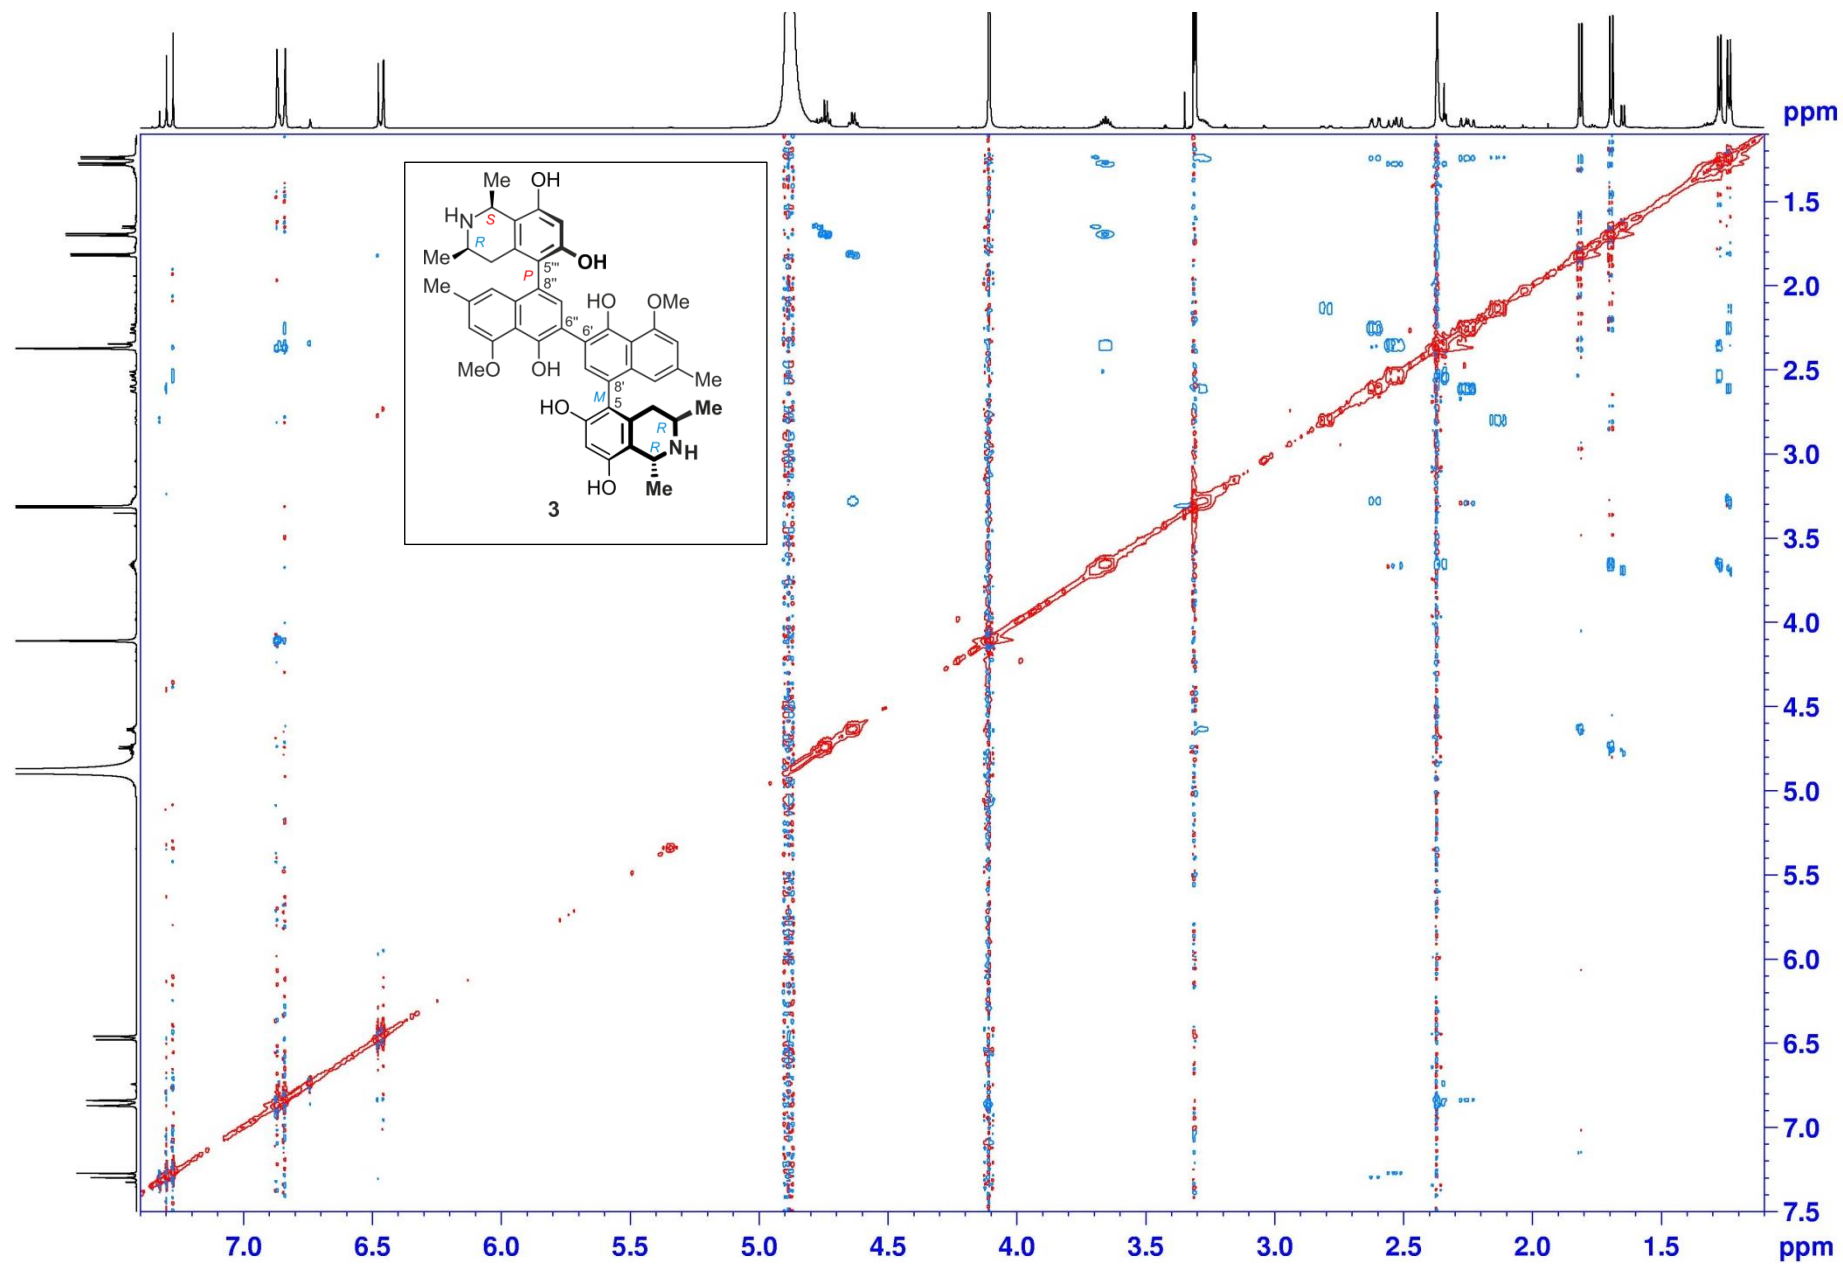

Fig. S29 ROESY NMR spectrum of compound **3** in methanol- $d_4$

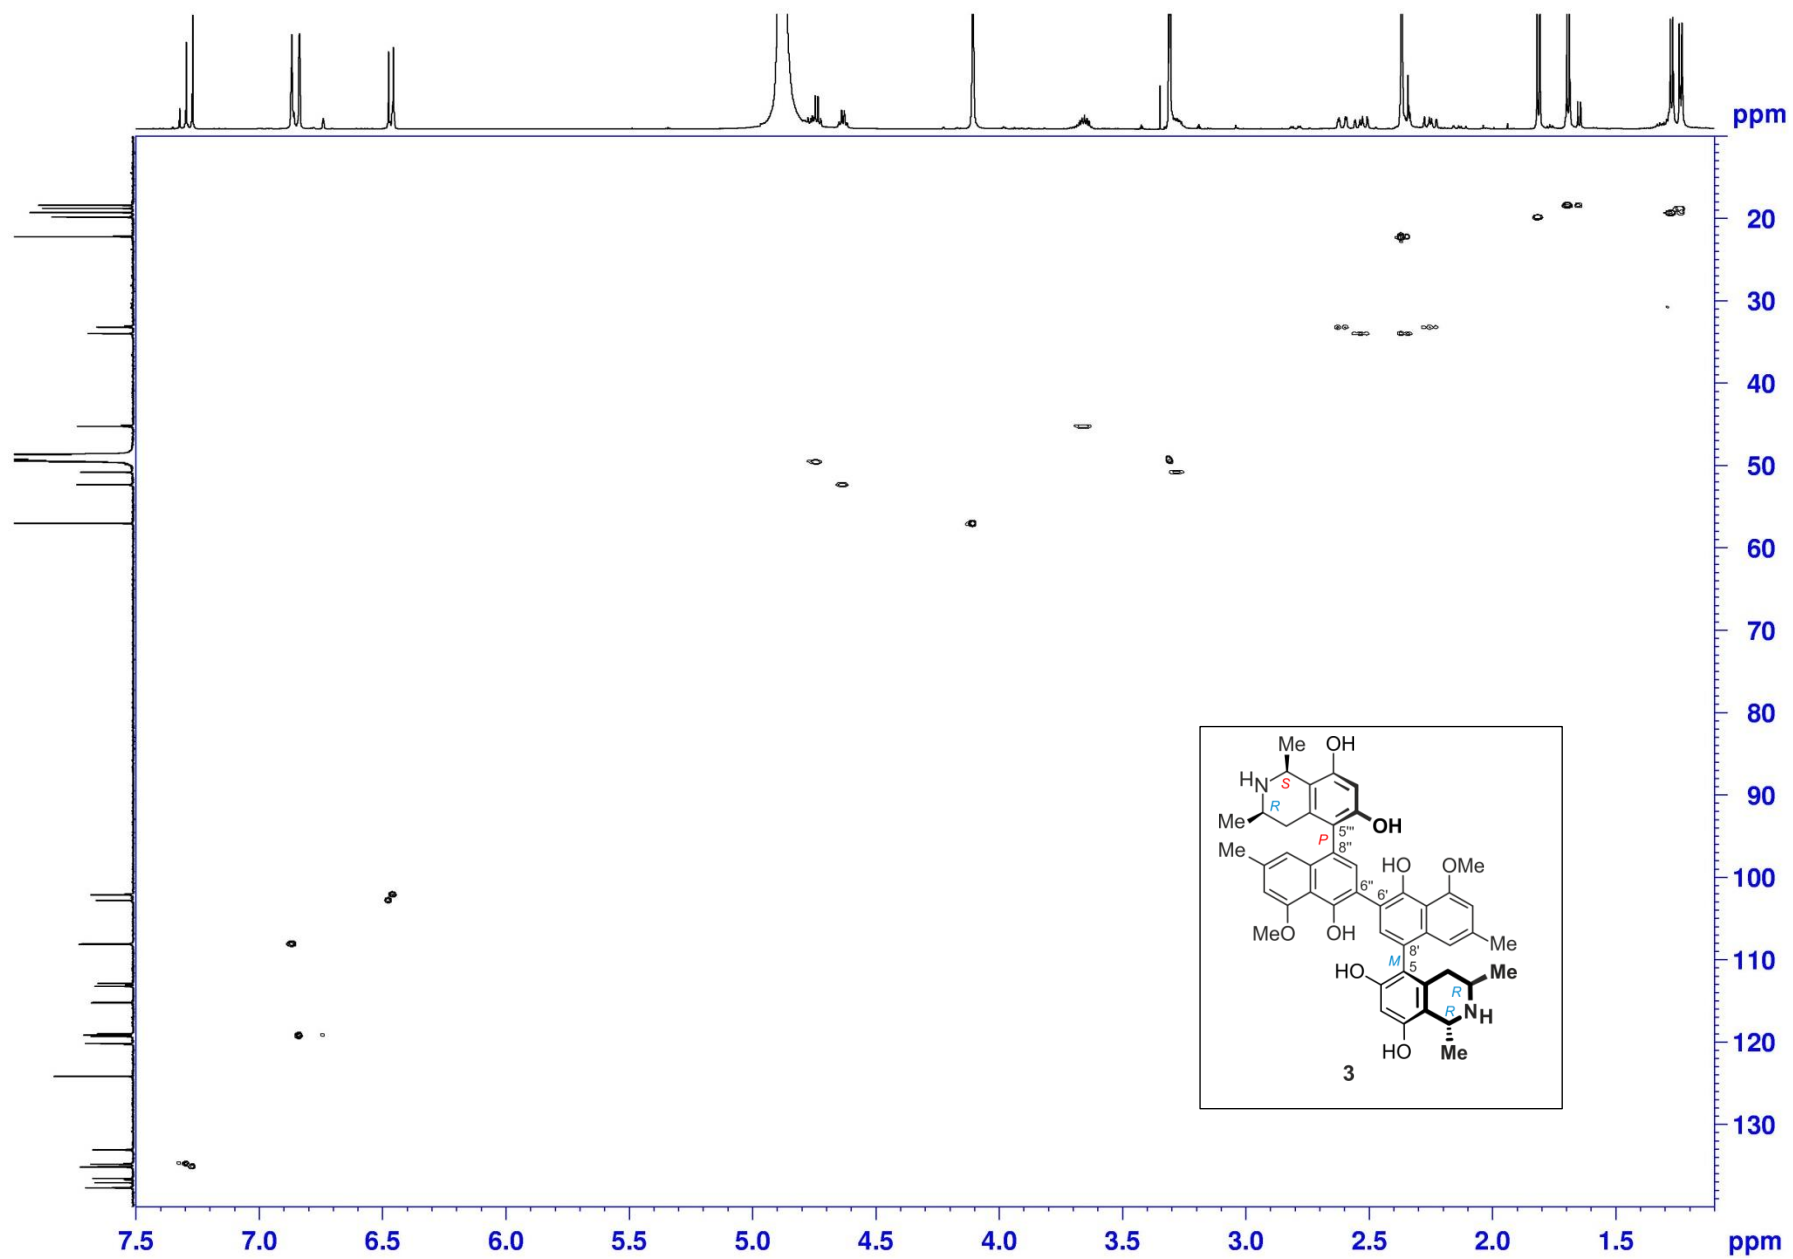

Fig. S30 HSQC NMR spectrum of compound 3 in methanol- $d_4$

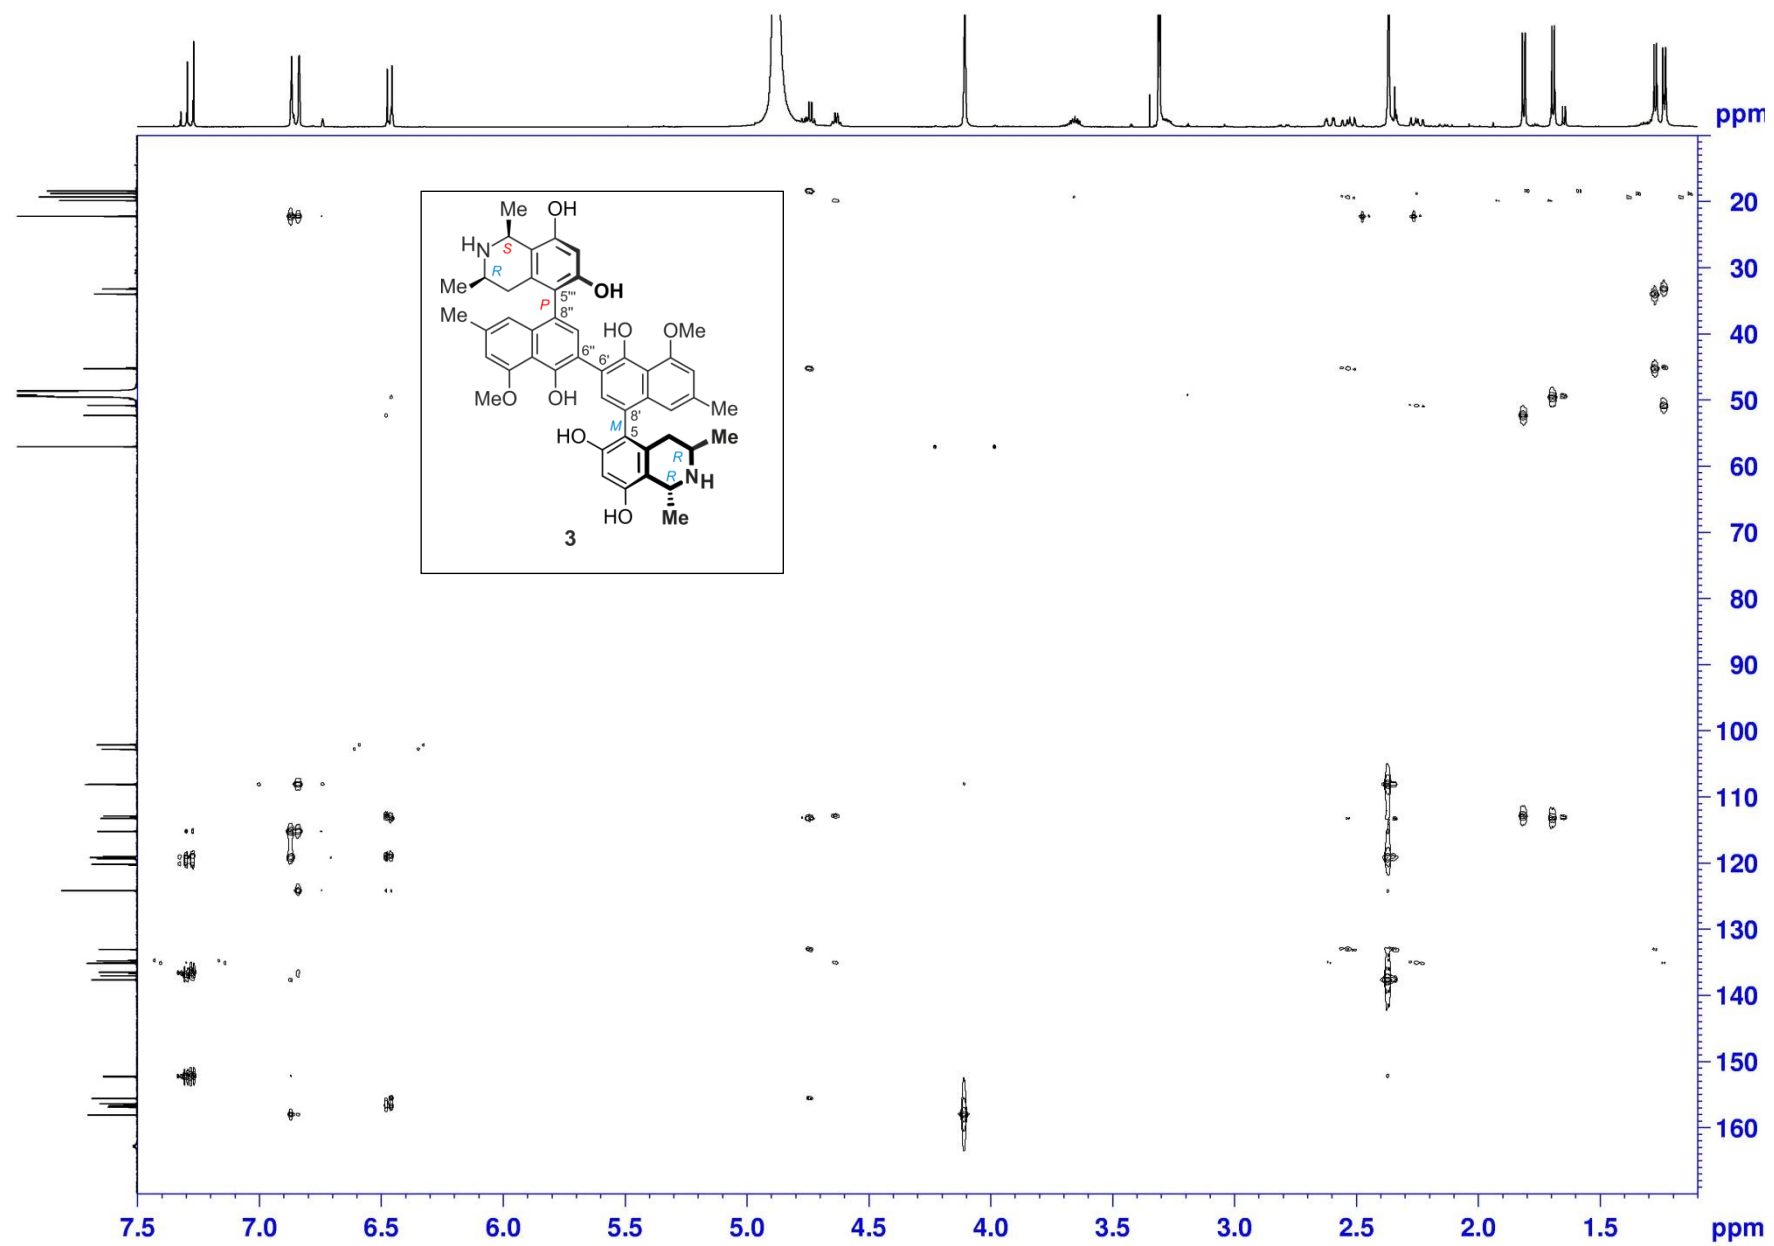

Fig. S31 HMBC NMR spectrum of compound 3 in methanol-*d*<sub>4</sub>



## Mass Spectrum Molecular Formula Report

## Analysis Info

Analysis Name D:\Data\Spektren2015\2015\_2654\_BRI.d  
 Method esi\_tune\_pos\_wide.m  
 Comment Blaise Kimbadi Lombe  
 B03-H2O-6  
 8 pmol/ $\mu$ l in MeOH

Acquisition Date 17.12.2015 14:30:04

Operator Administrator  
 Instrument micrOTOF 88

## Acquisition Parameter

|             |          |                |          |                    |        |
|-------------|----------|----------------|----------|--------------------|--------|
| Source Type | ESI      | Ion Polarity   | Positive | Set Corrector Fill | 48 V   |
| Scan Range  | n/a      | Capillary Exit | 280.0 V  | Set Pulsar Pull    | 804 V  |
| Scan Begin  | 50 m/z   | Hexapole RF    | 480.0 V  | Set Pulsar Push    | 807 V  |
| Scan End    | 3500 m/z | Skimmer 1      | 50.0 V   | Set Reflector      | 1700 V |
|             |          | Hexapole 1     | 23.0 V   | Set Flight Tube    | 8600 V |
|             |          |                |          | Set Detector TOF   | 2240 V |

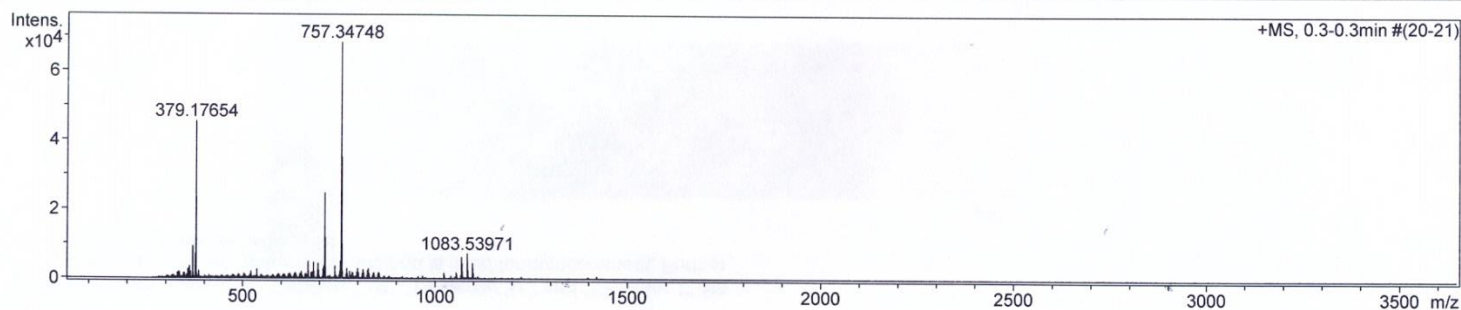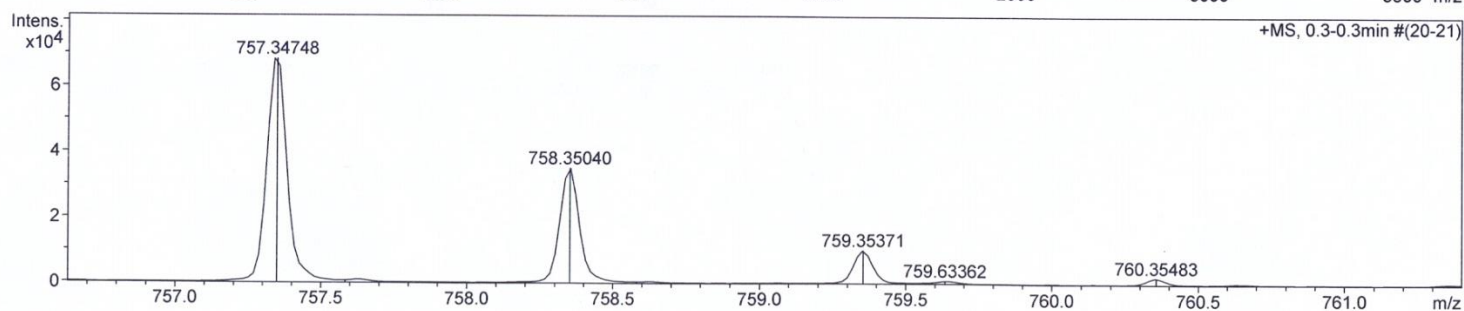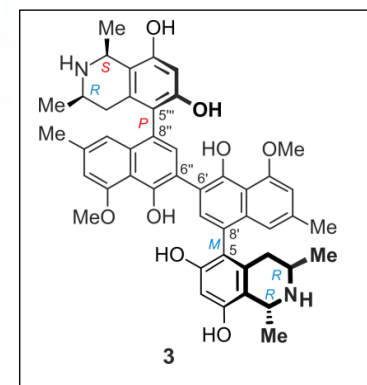

| Sum Formula                                                   | Sigma | m/z       | Err [ppm] | Mean Err [ppm] | rdb   | N Rule | e <sup>-</sup> |
|---------------------------------------------------------------|-------|-----------|-----------|----------------|-------|--------|----------------|
| C <sub>46</sub> H <sub>49</sub> N <sub>2</sub> O <sub>8</sub> | 0.00  | 757.34834 | 1.15      | 1.35           | 23.50 | ok     | even           |

Fig. S32 HRESIMS spectrum of compound 3

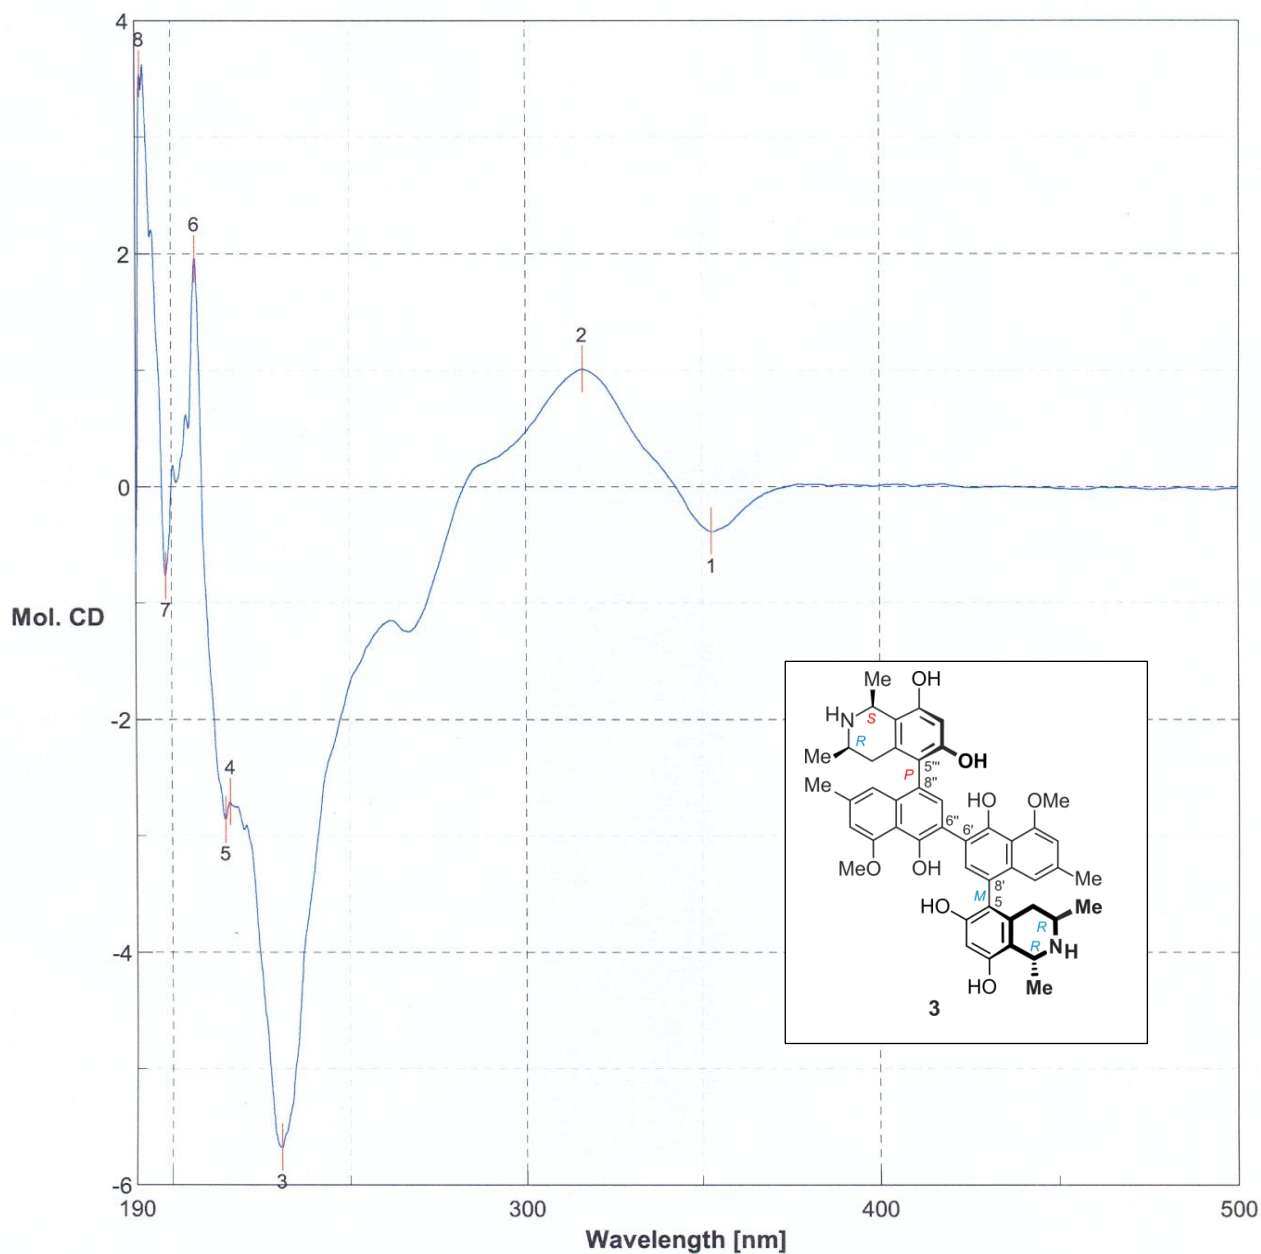

Date/Time 07.12.2015 17:57  
 Operator kimbadi  
 File Name BO3-H2O-6ok\_0,5mm.jws  
 Sample Name BO3-H2O-6\_0.5mm\_MeOH  
 Comment offline

| No. | nm    | Mol. CD   | No. | nm    | Mol. CD  | No. | nm    | Mol. CD  |
|-----|-------|-----------|-----|-------|----------|-----|-------|----------|
| 1   | 352.6 | -0.386955 | 2   | 316.1 | 1.00708  | 3   | 230.7 | -5.67618 |
| 4   | 216.3 | -2.70801  | 5   | 215   | -2.85682 | 6   | 206.6 | 1.95653  |
| 7   | 198.3 | -0.763366 | 8   | 191.3 | 3.54363  |     |       |          |

Fig. S33 CD spectrum of compound 3 in methanol

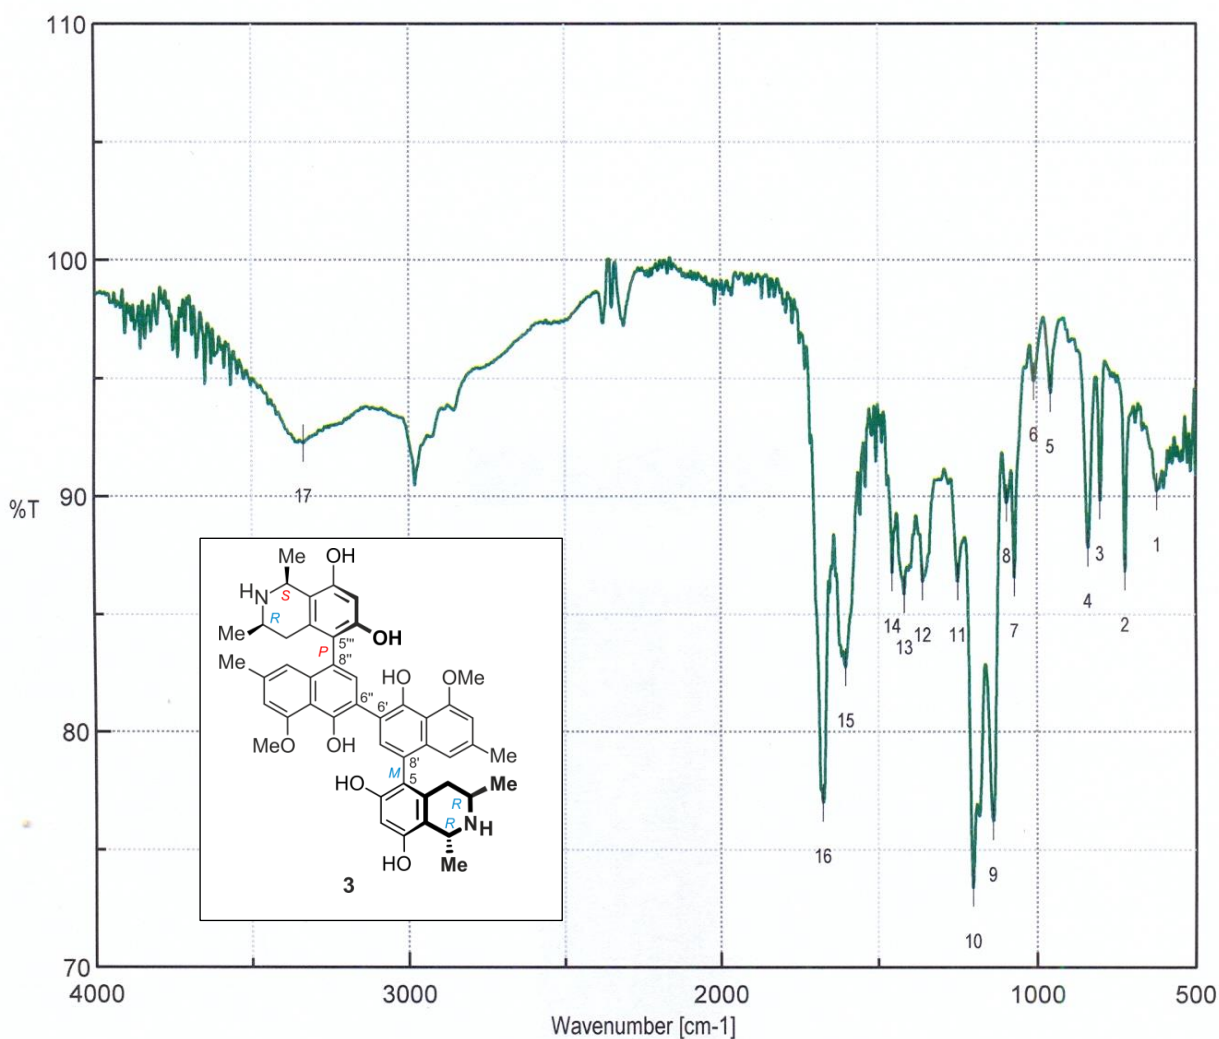

Results of Peak Find

| No. | Position | Intensity | No. | Position | Intensity |
|-----|----------|-----------|-----|----------|-----------|
| 1   | 622.895  | 90.1698   | 2   | 723.175  | 86.7789   |
| 3   | 801.278  | 89.7919   | 4   | 838.883  | 87.7775   |
| 5   | 957.484  | 94.3552   | 6   | 1009.55  | 94.8438   |
| 7   | 1071.26  | 86.5254   | 8   | 1096.33  | 89.6941   |
| 9   | 1138.76  | 76.1831   | 10  | 1202.4   | 73.3826   |
| 11  | 1250.61  | 86.3457   | 12  | 1360.53  | 86.3541   |
| 13  | 1418.39  | 85.8162   | 14  | 1456.96  | 86.7396   |
| 15  | 1603.52  | 82.7361   | 16  | 1674.87  | 76.9744   |
| 17  | 3335.28  | 92.2442   |     |          |           |

[Comments]

Sample name BO3-H2O-6  
 Comment drop(MeOH)  
 User Kimbadi  
 Division AK Bringmann  
 Company Uni Würzburg

[Measurement Information]

Model Name FT/IR-4600typeA  
 Serial Number D063461786

Accessory ATR PRO ONE  
 Accessory S/N A070661809  
 Incident angle 45 deg

Measurement Date 20.12.2017 14:53

Light Source Standard  
 Detector TGS  
 Accumulation 16  
 Resolution 4 cm<sup>-1</sup>  
 Zero Filling On  
 Apodization Cosine  
 Gain Auto (4)  
 Aperture Auto (7.1 mm)  
 Scanning Speed Auto (2 mm/sec)  
 Filter Auto (30000 Hz)

Fig. S34 IR spectrum of compound 3

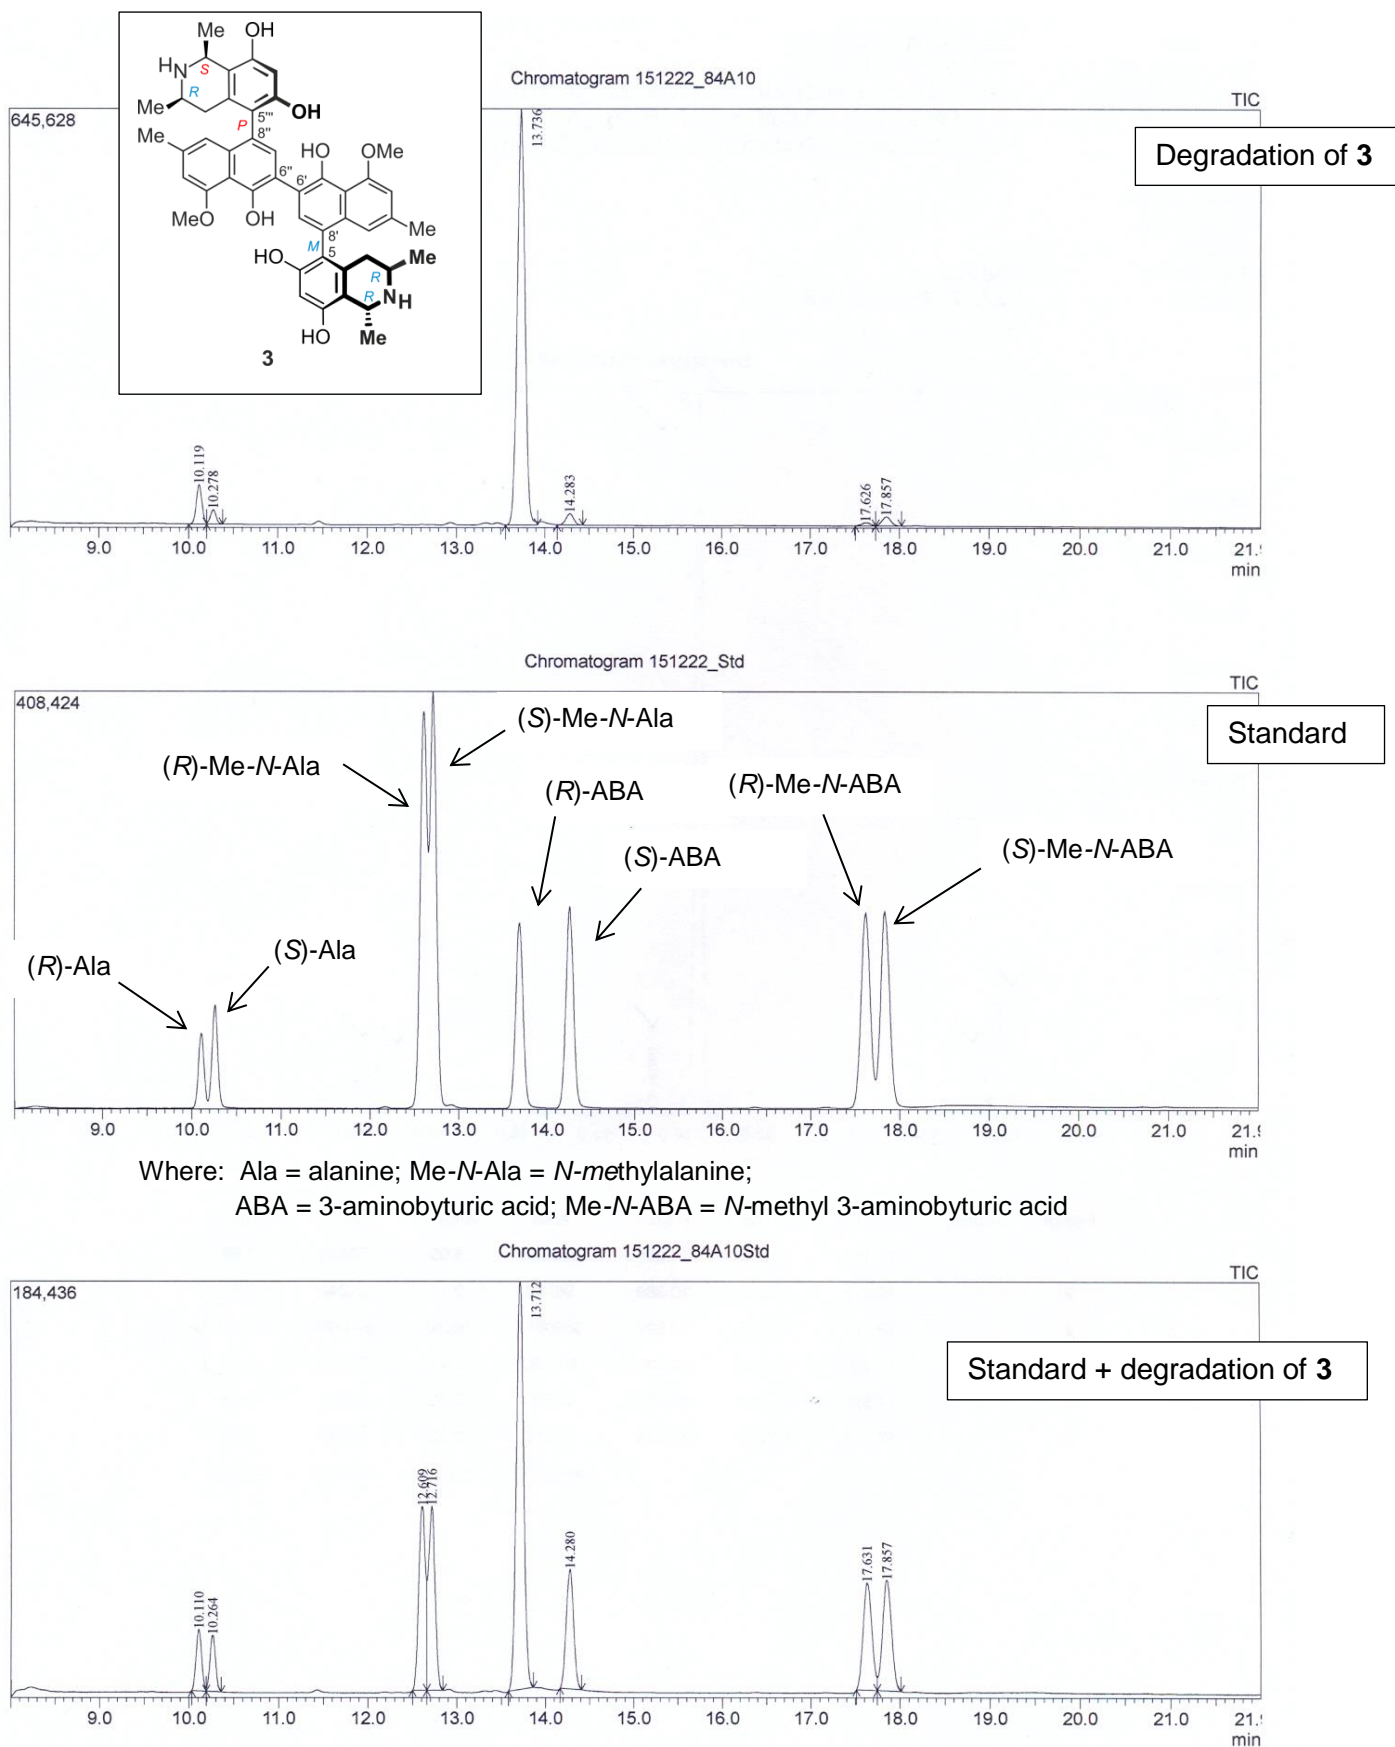

**Fig. S35** Results of the oxidative degradation of compound **3**

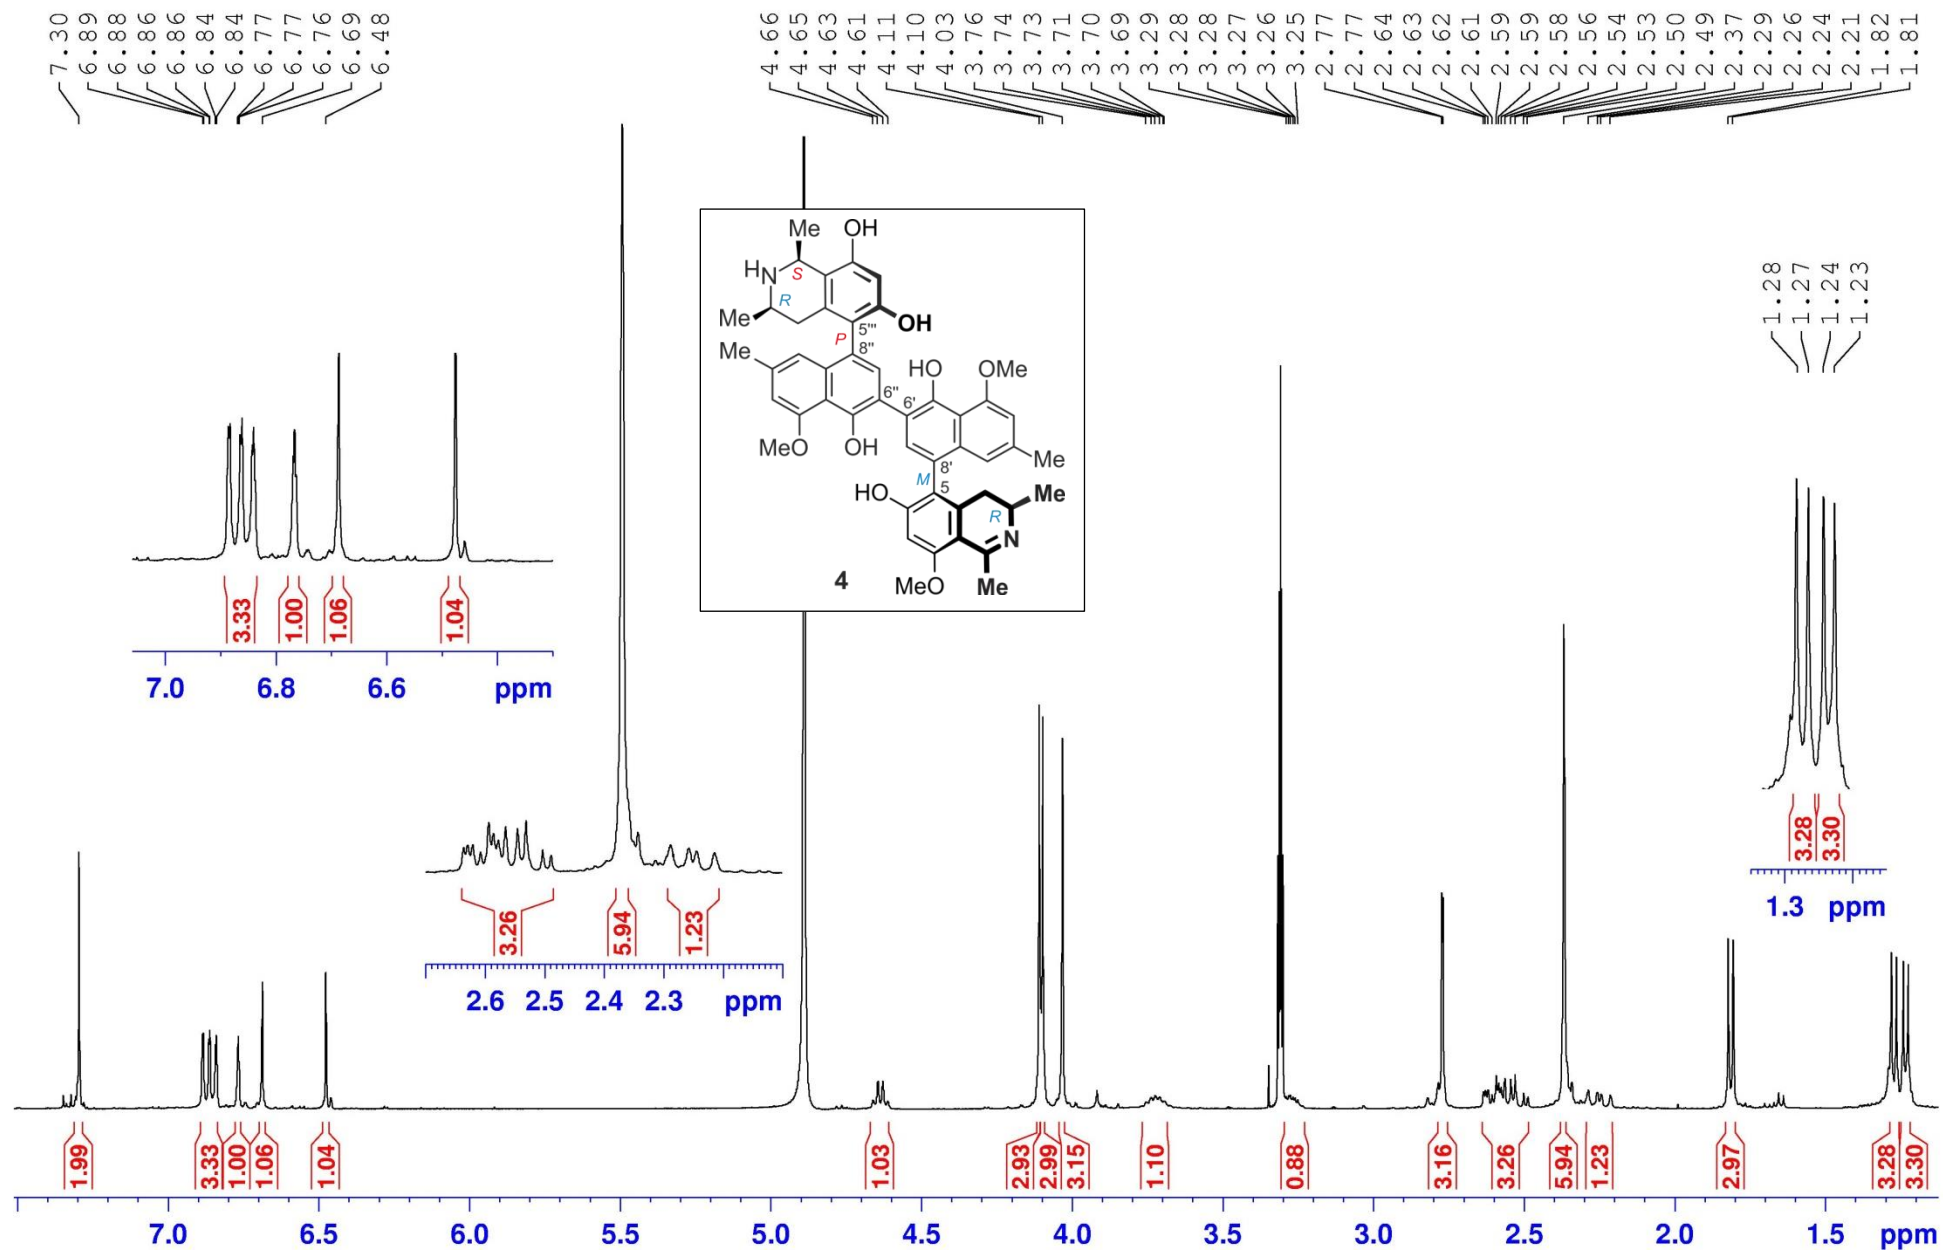

Fig. S36  $^1\text{H}$  NMR spectrum of compound 4 in methanol- $d_4$

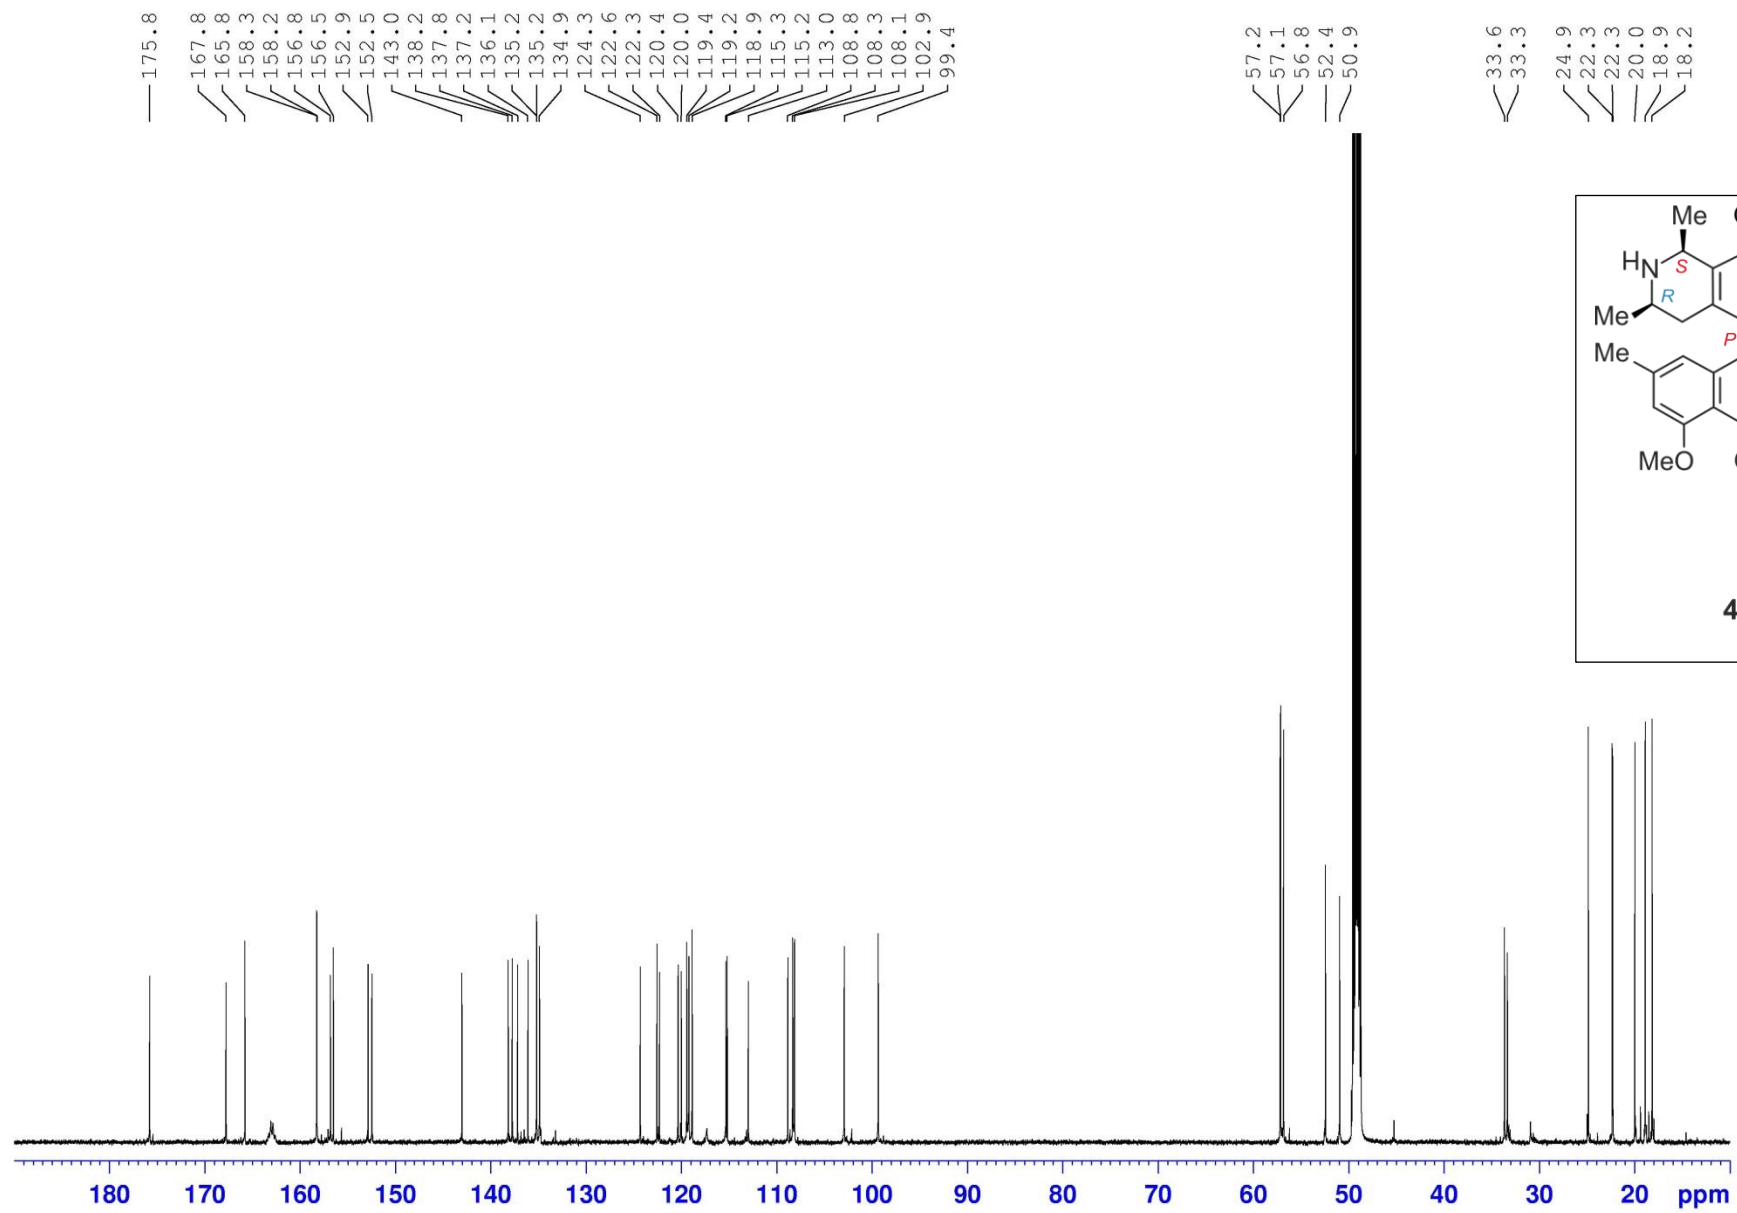

Fig. S37  $^{13}\text{C}$  NMR spectrum of compound 4 in methanol- $d_4$

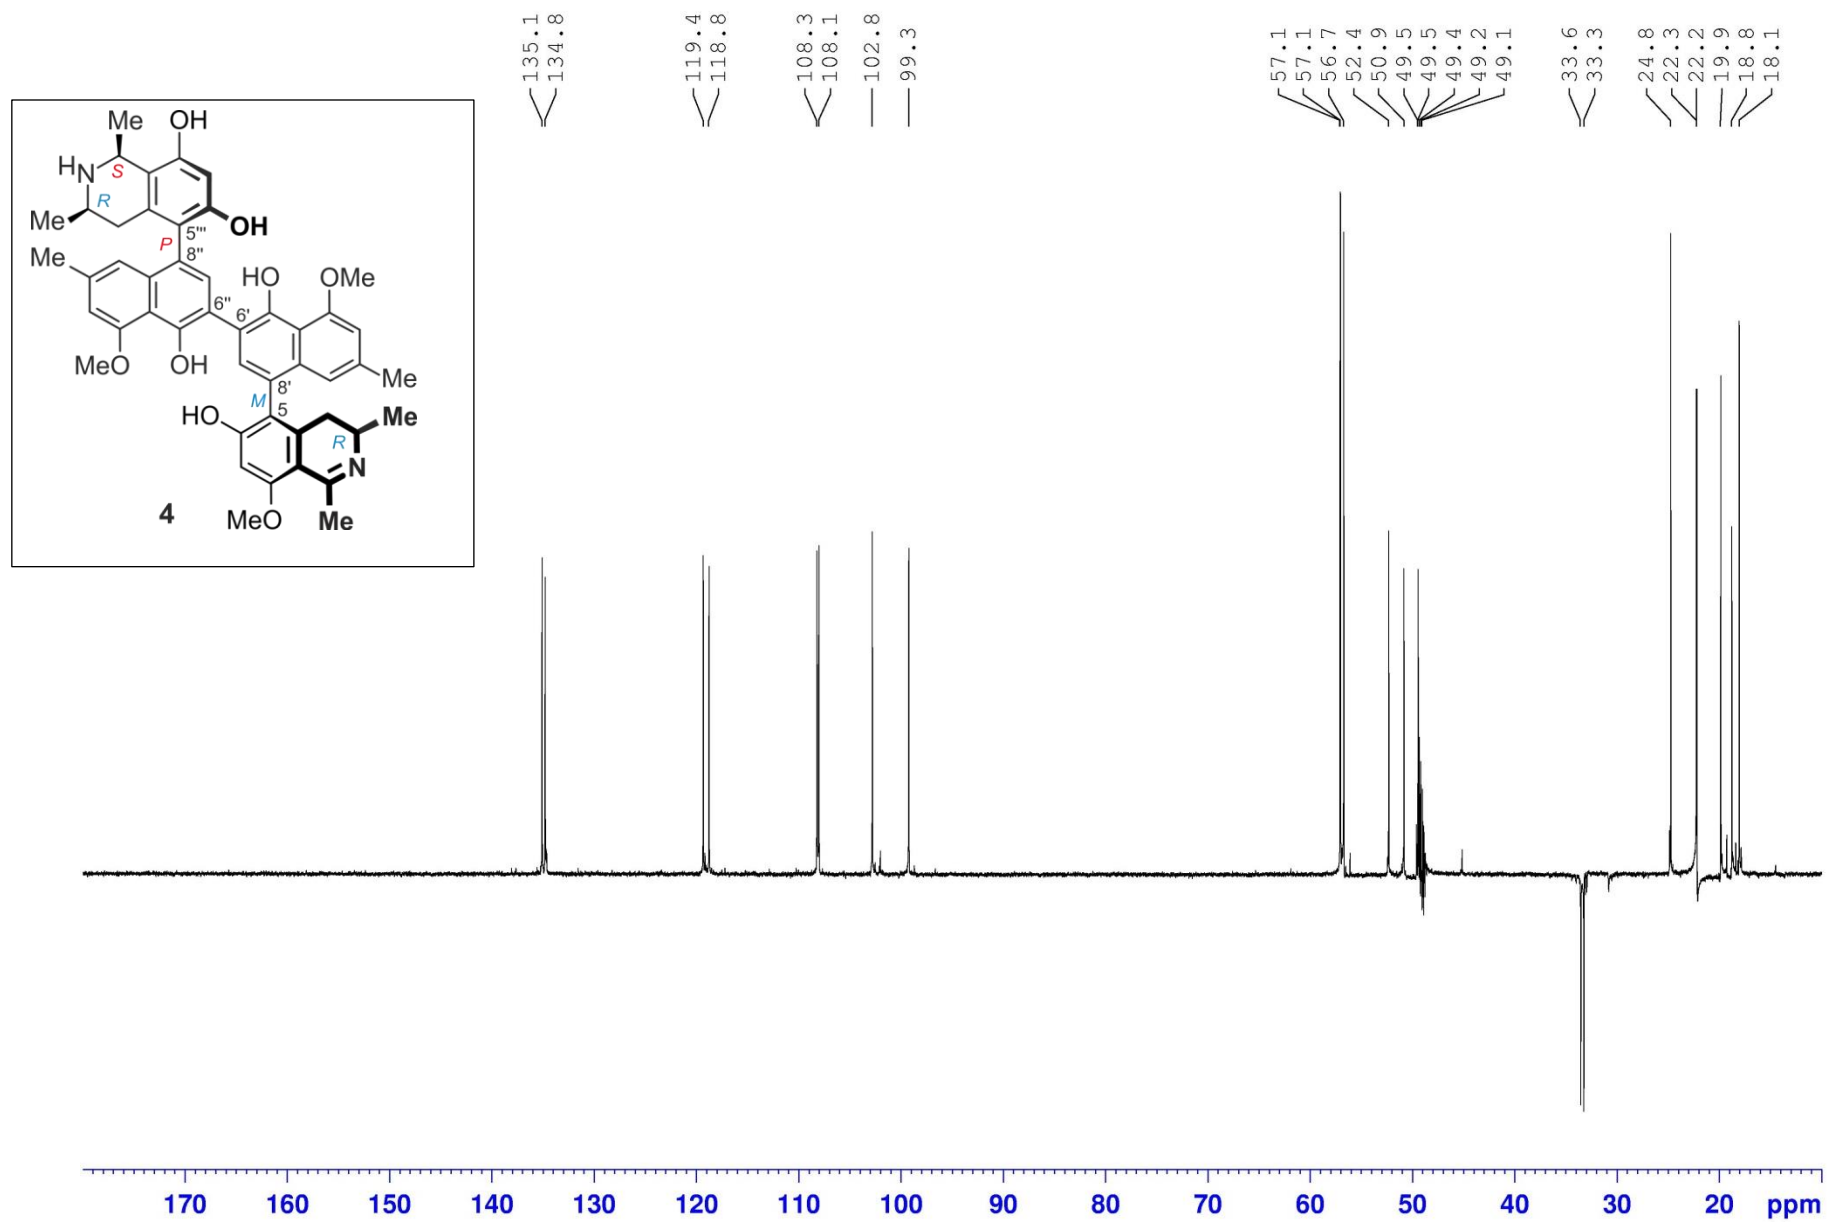

Fig. S38 DEPT-135 NMR spectrum of compound **4** in methanol- $d_4$

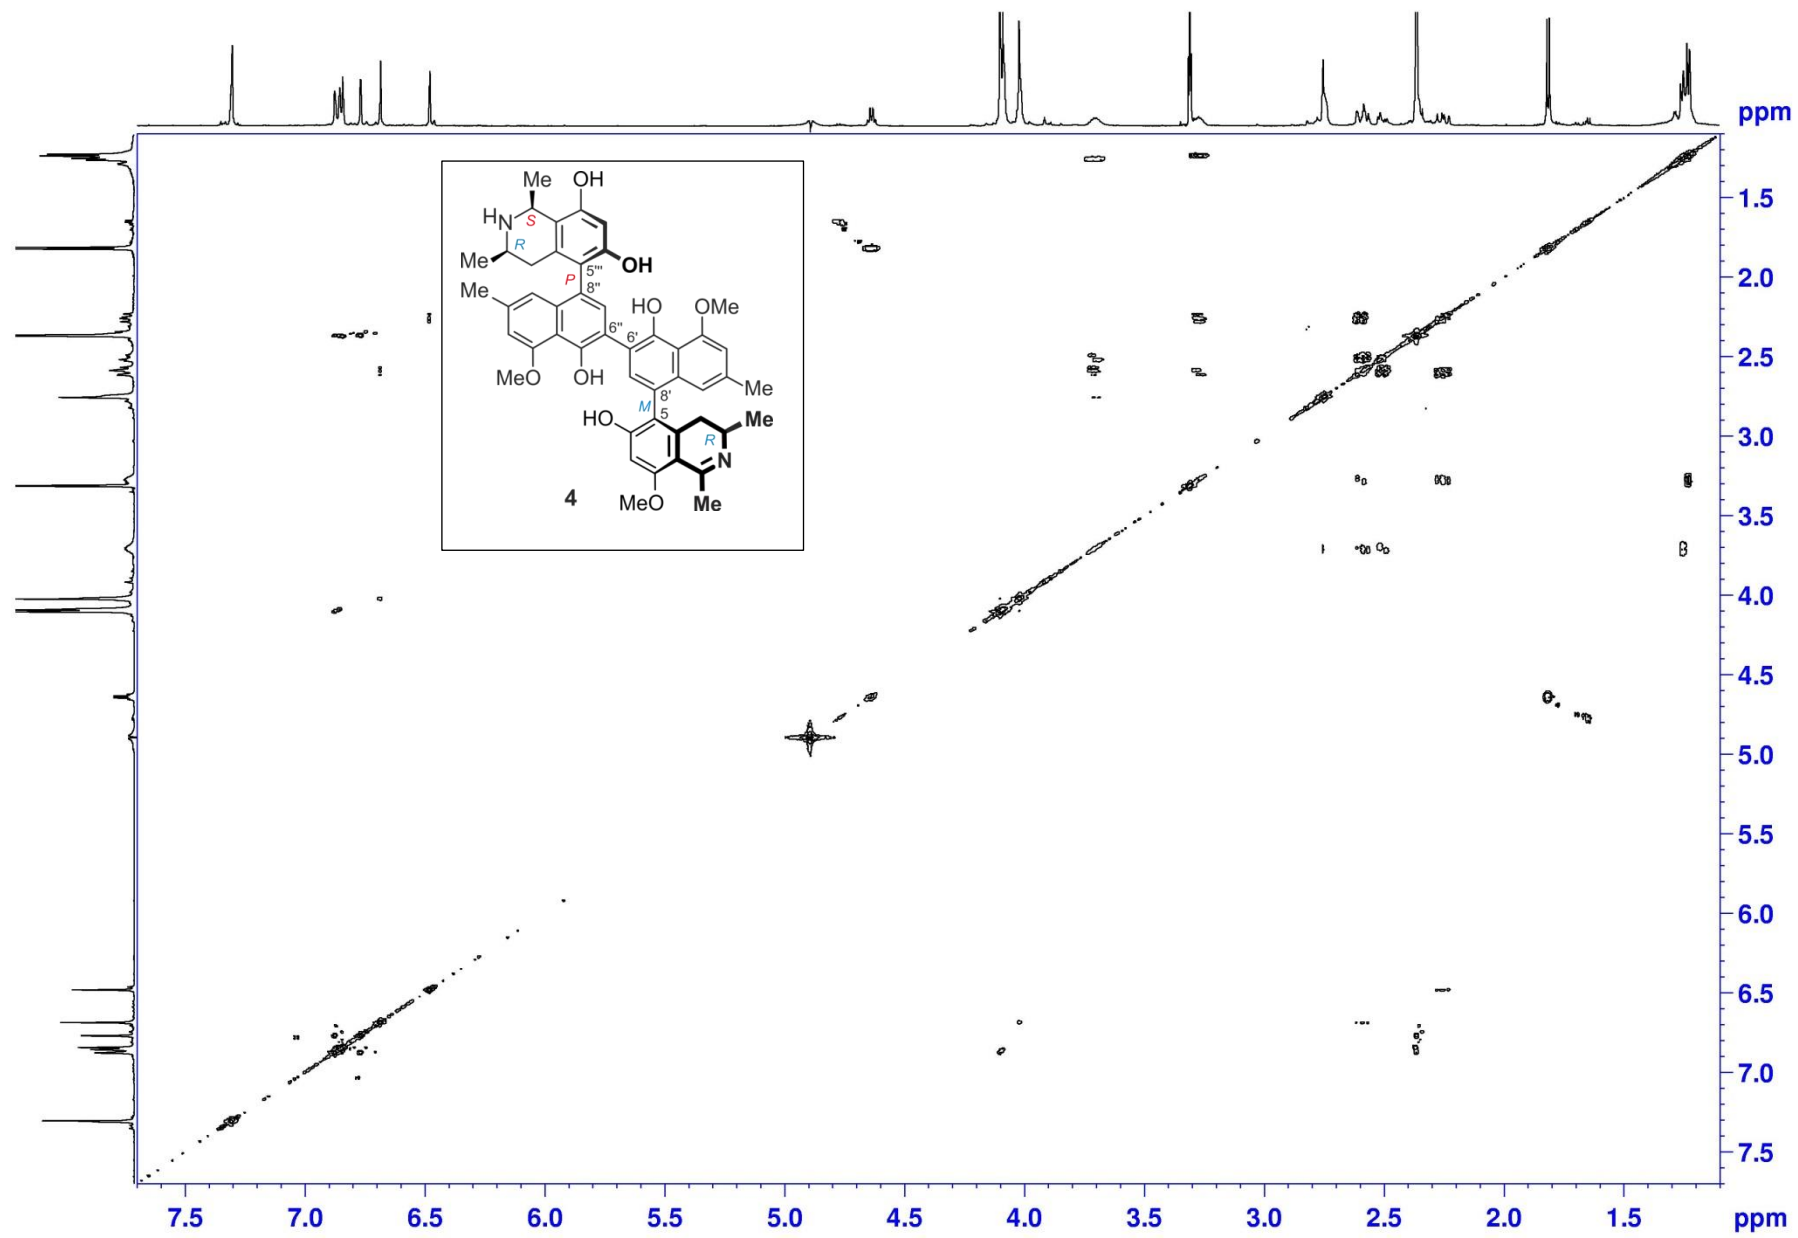

Fig. S39 COSY NMR spectrum of compound 4 in methanol-*d*<sub>4</sub>



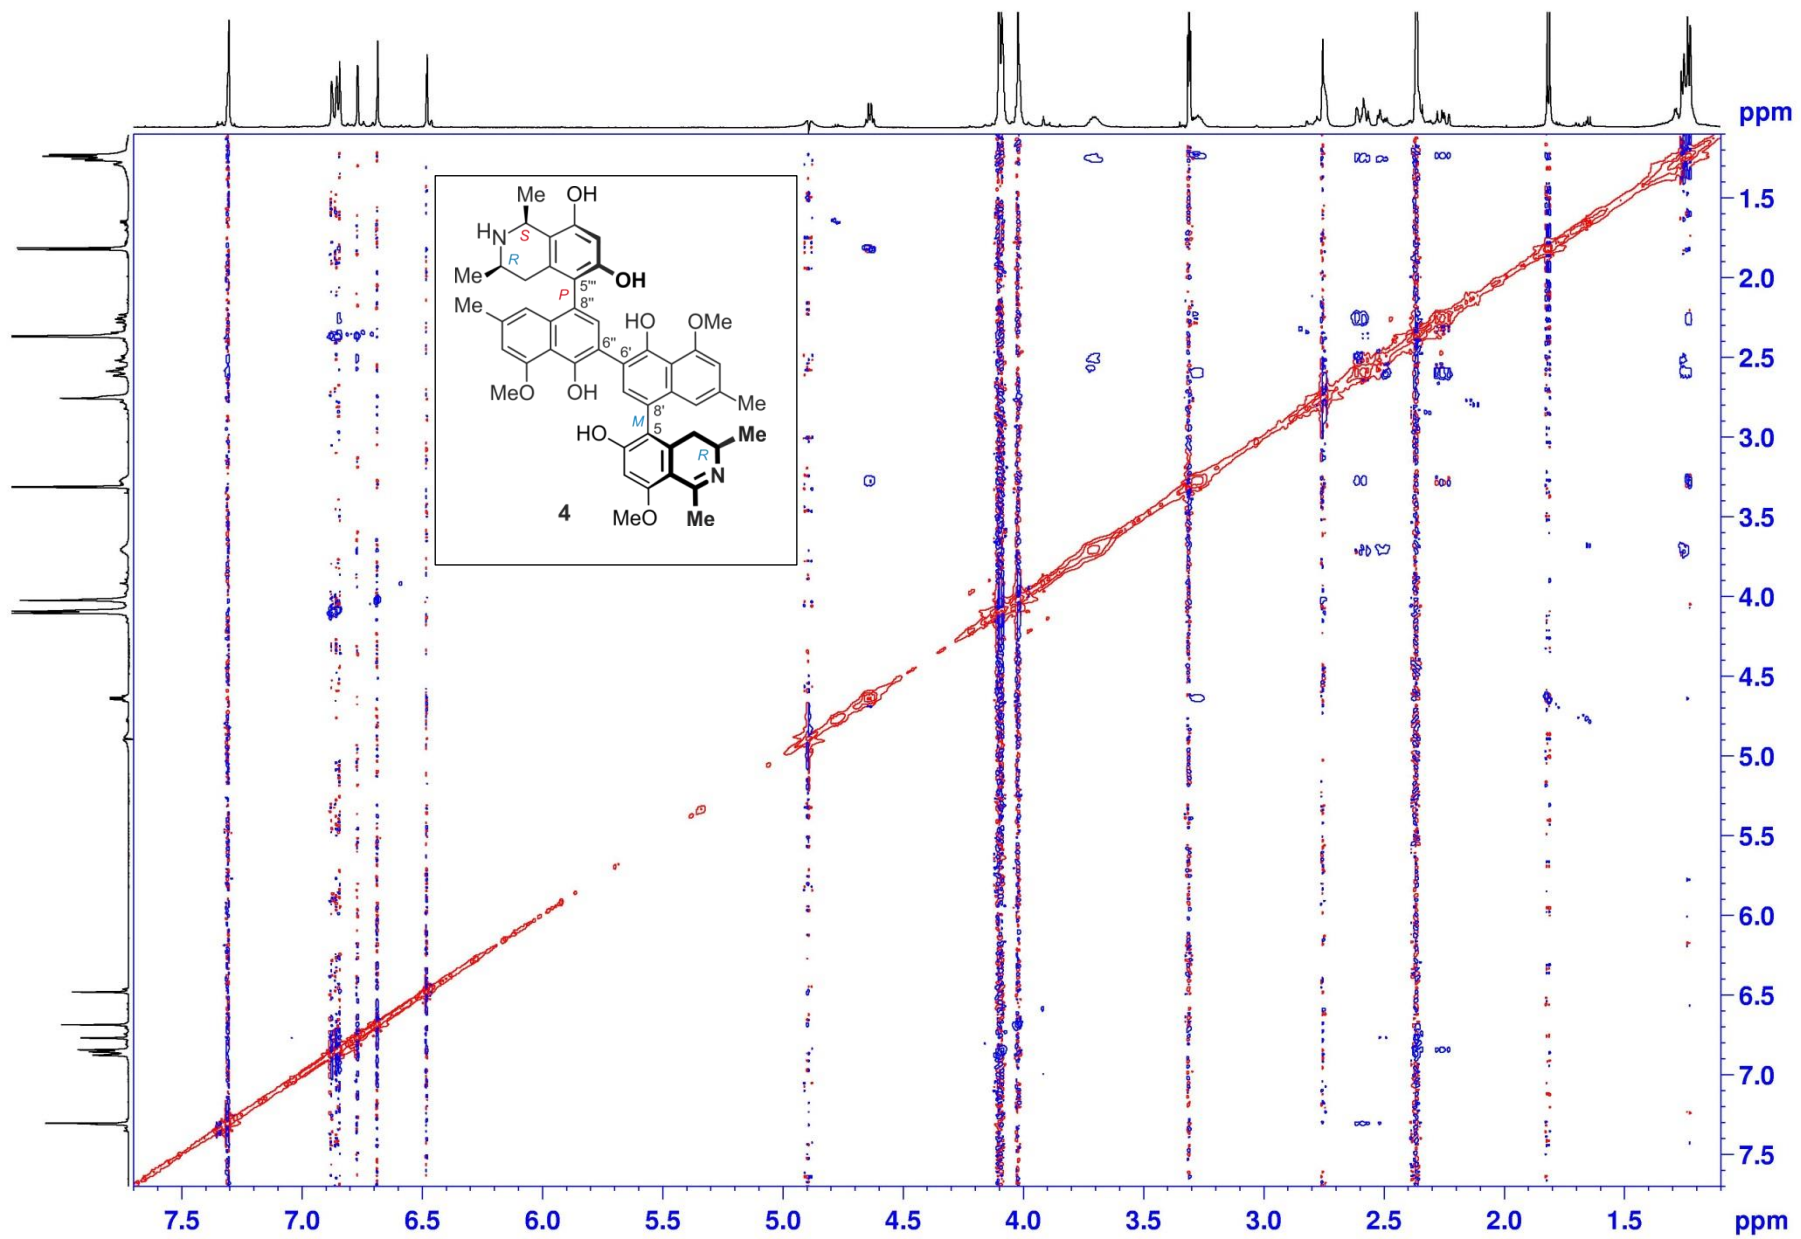

**Fig. S40** ROESY NMR spectrum of compound **4** in methanol- $d_4$

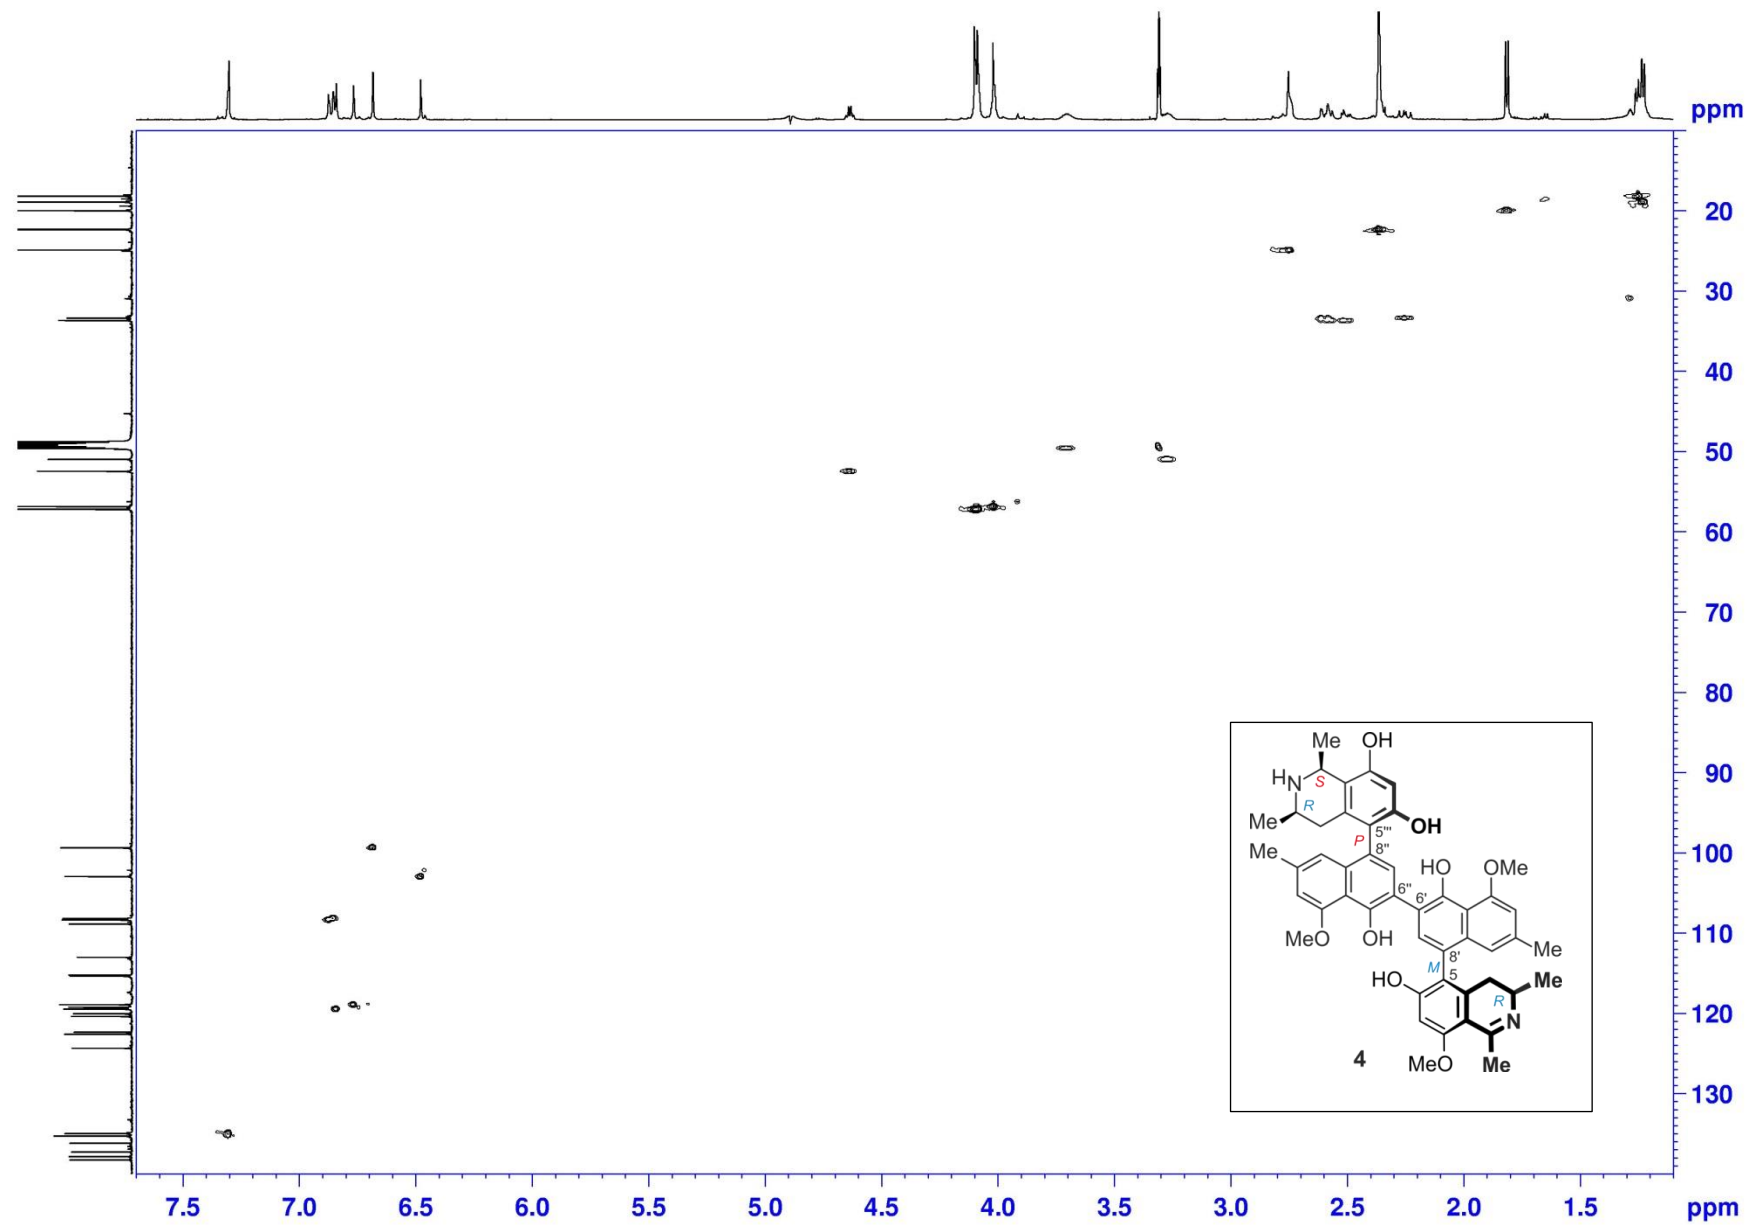

Fig. S41 HSQC NMR spectrum of compound 4 in methanol- $d_4$

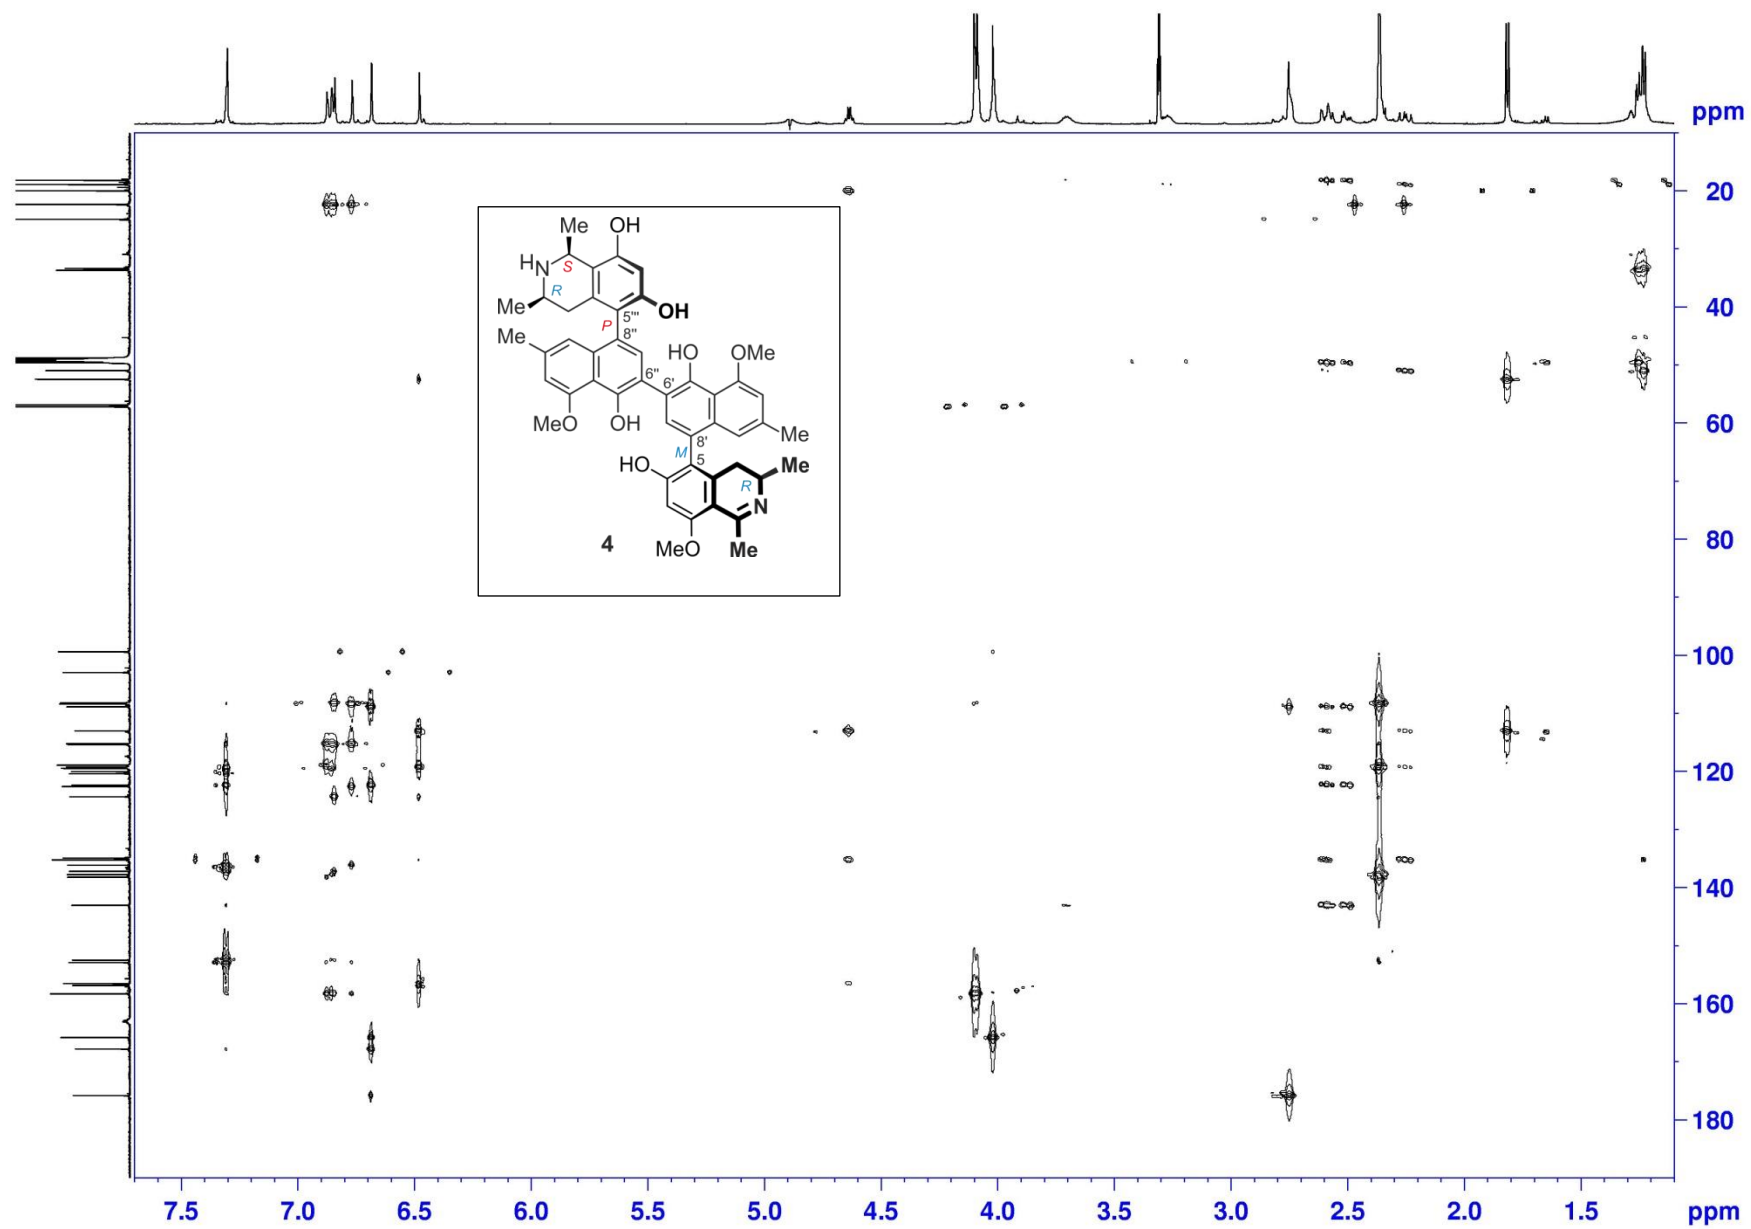

**Fig. S42** HMBC NMR spectrum of compound **4** in methanol- $d_4$

# Mass Spectrum SmartFormula Report

## Analysis Info

Analysis Name: D:\Data\Spektren2017\2017\_3186\_BRI\_BO3-H2O-8p\_27\_01\_2707.d  
 Method: automation\_esi\_tune\_pos\_mid\_ja\_meoh.m  
 Sample Name: 2017\_3186\_BRI\_BO3-H2O-8p  
 Comment: Kimbadi Lombe Blaise  
 BO3-H2O-8p  
 8pmol/ul in MeOH

Acquisition Date: 10/18/2017 12:39:58 PM  
 Operator: J.Adelmann  
 Instrument: micrOTOF-Q III 8228888.20516

## Acquisition Parameter

|             |            |                 |           |                  |           |
|-------------|------------|-----------------|-----------|------------------|-----------|
| Source Type | ESI        | Ion Polarity    | Positive  | Set Nebulizer    | 0.7 Bar   |
| Focus       | Not active | Set Funnel 1 RF | 300.0 Vpp | Set Dry Heater   | 200 °C    |
| Scan Begin  | 200 m/z    | Set Funnel 2 RF | 400.0 Vpp | Set Dry Gas      | 5.0 l/min |
| Scan End    | 3500 m/z   | Set Hexapole RF | 500.0 Vpp | Set Divert Valve | Source    |

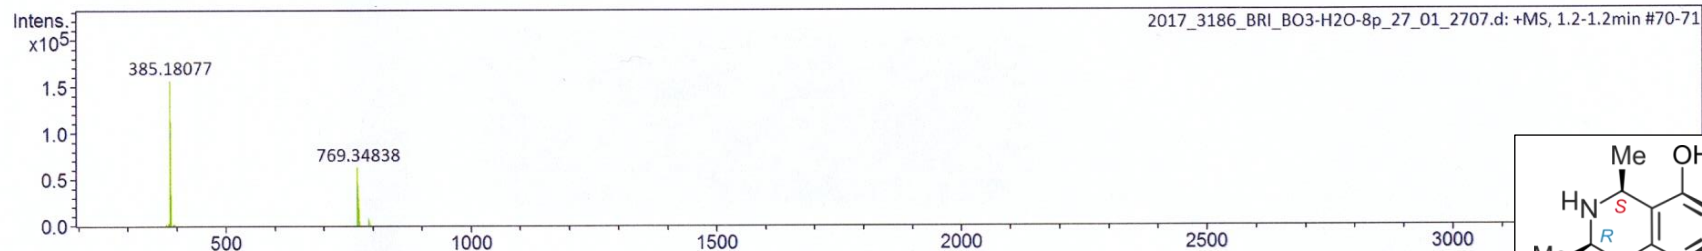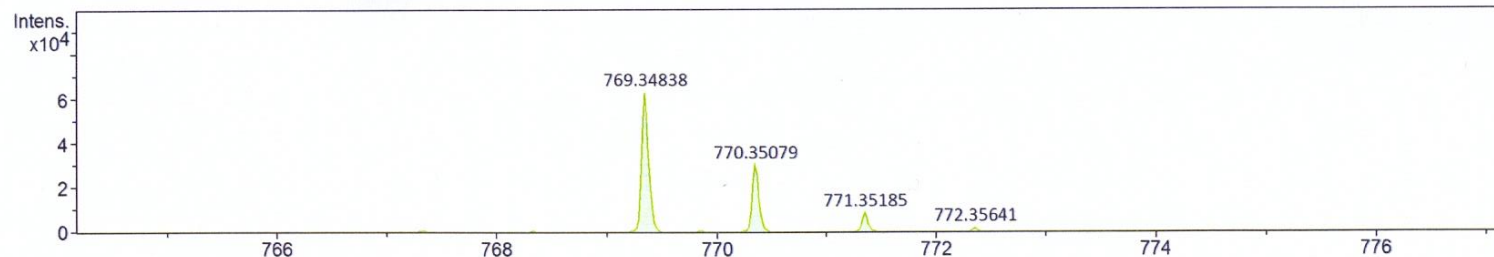

| Meas. m/z | # | Ion Formula | m/z       | err [ppm] | mSigma | # mSigma | Score  | rdb  | e <sup>-</sup> Conf | N-Rule |
|-----------|---|-------------|-----------|-----------|--------|----------|--------|------|---------------------|--------|
| 769.34838 | 1 | C47H49N2O8  | 769.34834 | -0.04     | 25.0   | 1        | 100.00 | 24.5 | even                | ok     |

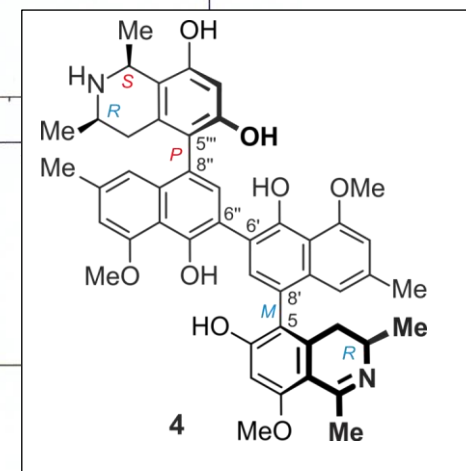

**Fig. S43** HRESIMS spectrum of compound **4**

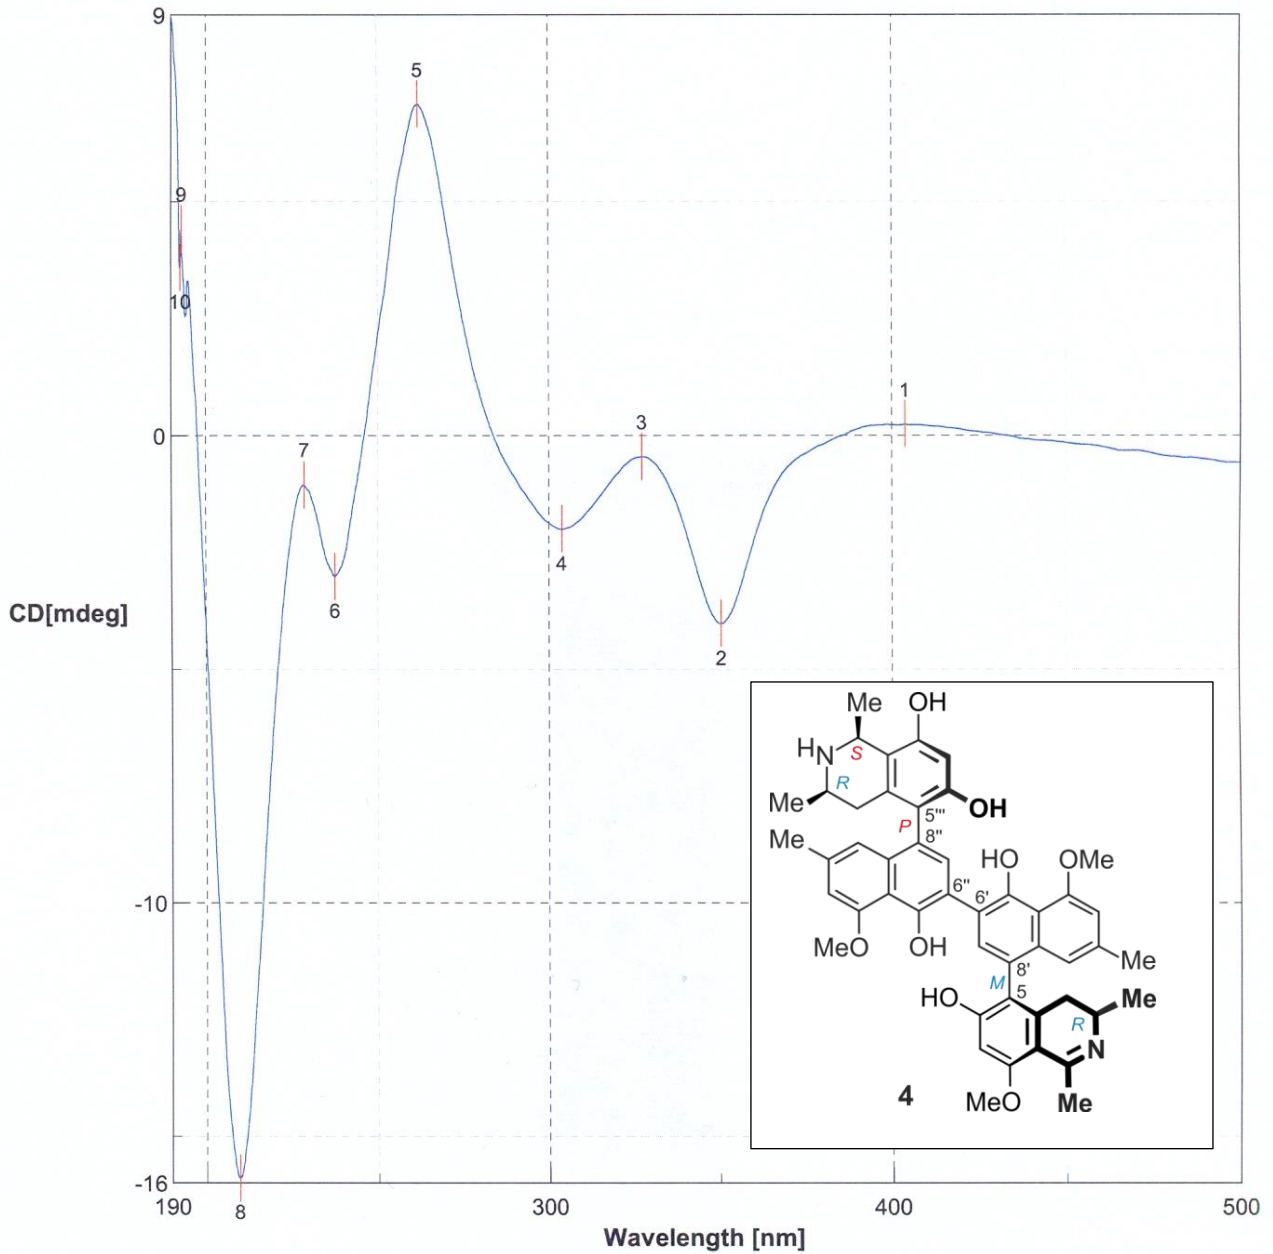

Date/Time 20.12.2017 18:28  
 Operator Kimbadi  
 File Name BO3-H2O-8\_0#005.jws  
 Sample Name BO3-H2O-8\_0  
 Comment offline

| No. | nm    | CD[mdeg] | No. | nm    | CD[mdeg] | No. | nm    | CD[mdeg]  |
|-----|-------|----------|-----|-------|----------|-----|-------|-----------|
| 1   | 403.8 | 0.232944 | 2   | 350.3 | -4.02852 | 3   | 327.3 | -0.458048 |
| 4   | 303.8 | -2.00276 | 5   | 261.8 | 7.08695  | 6   | 237.4 | -3.01912  |
| 7   | 228.5 | -1.05888 | 8   | 209.5 | -15.8847 | 9   | 193   | 4.42249   |
| 10  | 192.6 | 3.59684  |     |       |          |     |       |           |

Fig. S44 CD spectrum of compound 4 in methanol

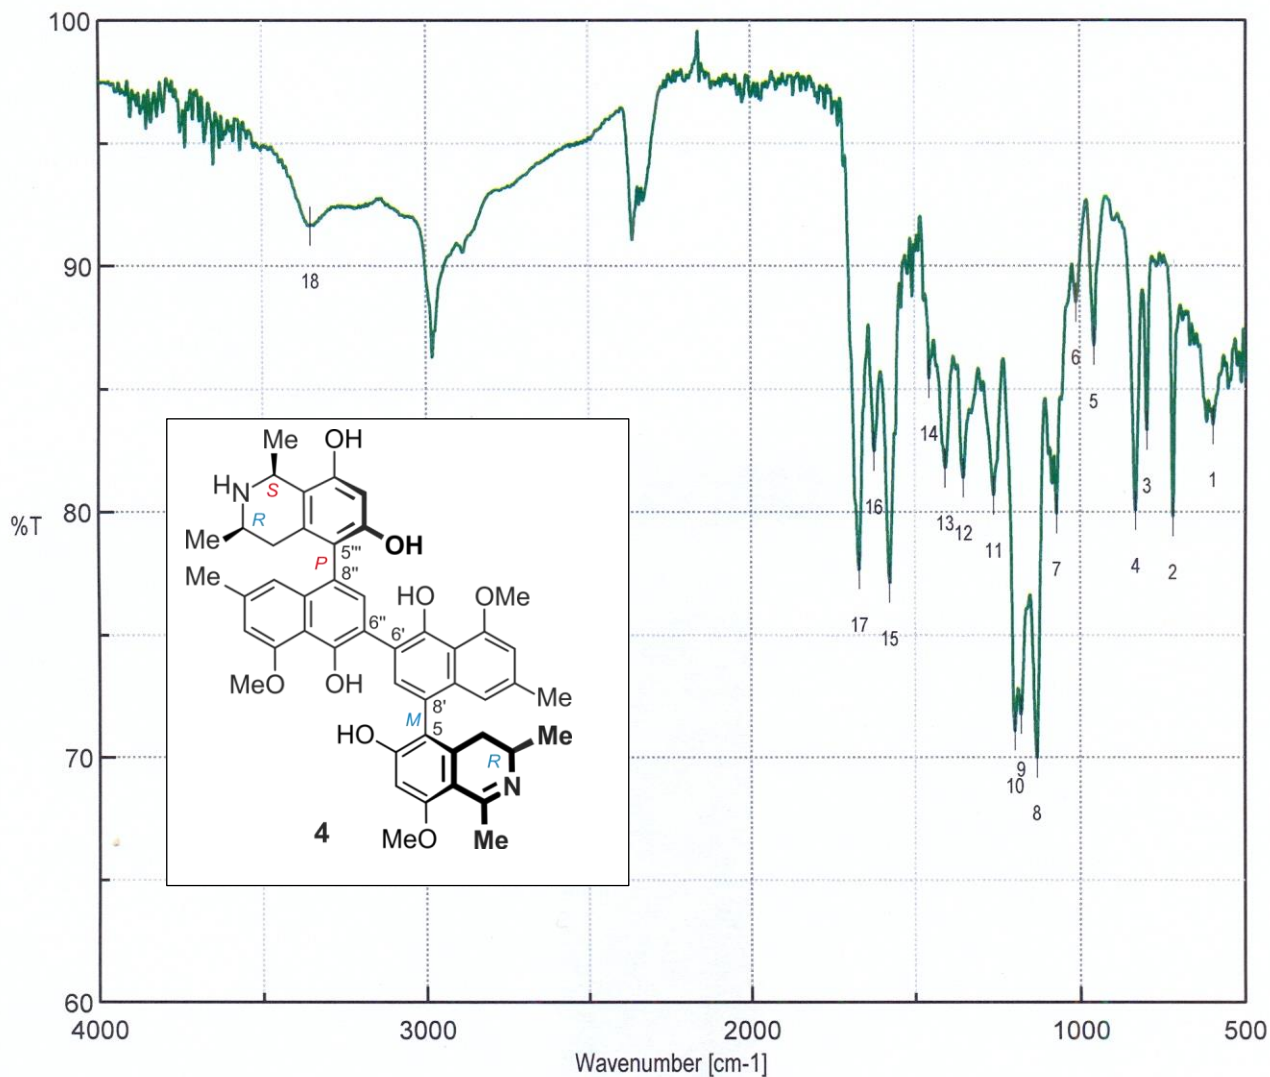

| Results of Peak Find |          |           |     |          |           |
|----------------------|----------|-----------|-----|----------|-----------|
| No.                  | Position | Intensity | No. | Position | Intensity |
| 1                    | 598.789  | 83.5223   | 2   | 720.282  | 79.775    |
| 3                    | 798.385  | 83.2913   | 4   | 832.133  | 80.0182   |
| 5                    | 957.484  | 86.7518   | 6   | 1011.48  | 88.4989   |
| 7                    | 1071.26  | 79.9095   | 8   | 1132.01  | 69.9563   |
| 9                    | 1180.22  | 71.7542   | 10  | 1198.54  | 71.0595   |
| 11                   | 1262.18  | 80.6436   | 12  | 1353.78  | 81.3499   |
| 13                   | 1407.78  | 81.7623   | 14  | 1455.99  | 85.4004   |
| 15                   | 1577.49  | 77.0809   | 16  | 1623.77  | 82.4294   |
| 17                   | 1670.05  | 77.6268   | 18  | 3353.6   | 91.6289   |

[Comments]  
 Sample name BO3-H2O-8a  
 Comment drop(MeOH)  
 User Kimbadi  
 Division AK Bringmann  
 Company Uni Würzburg

[Measurement Information]  
 Model Name FT/IR-4600typeA  
 Serial Number D063461786

Accessory ATR PRO ONE  
 Accessory S/N A070661809  
 Incident angle 45 deg

Measurement Date 20.12.2017 14:32

Light Source Standard  
 Detector TGS  
 Accumulation 16  
 Resolution 4 cm<sup>-1</sup>  
 Zero Filling On  
 Apodization Cosine  
 Gain Auto (4)  
 Aperture Auto (7.1 mm)  
 Scanning Speed Auto (2 mm/sec)  
 Filter Auto (30000 Hz)

Fig. S45 IR spectrum of compound 4

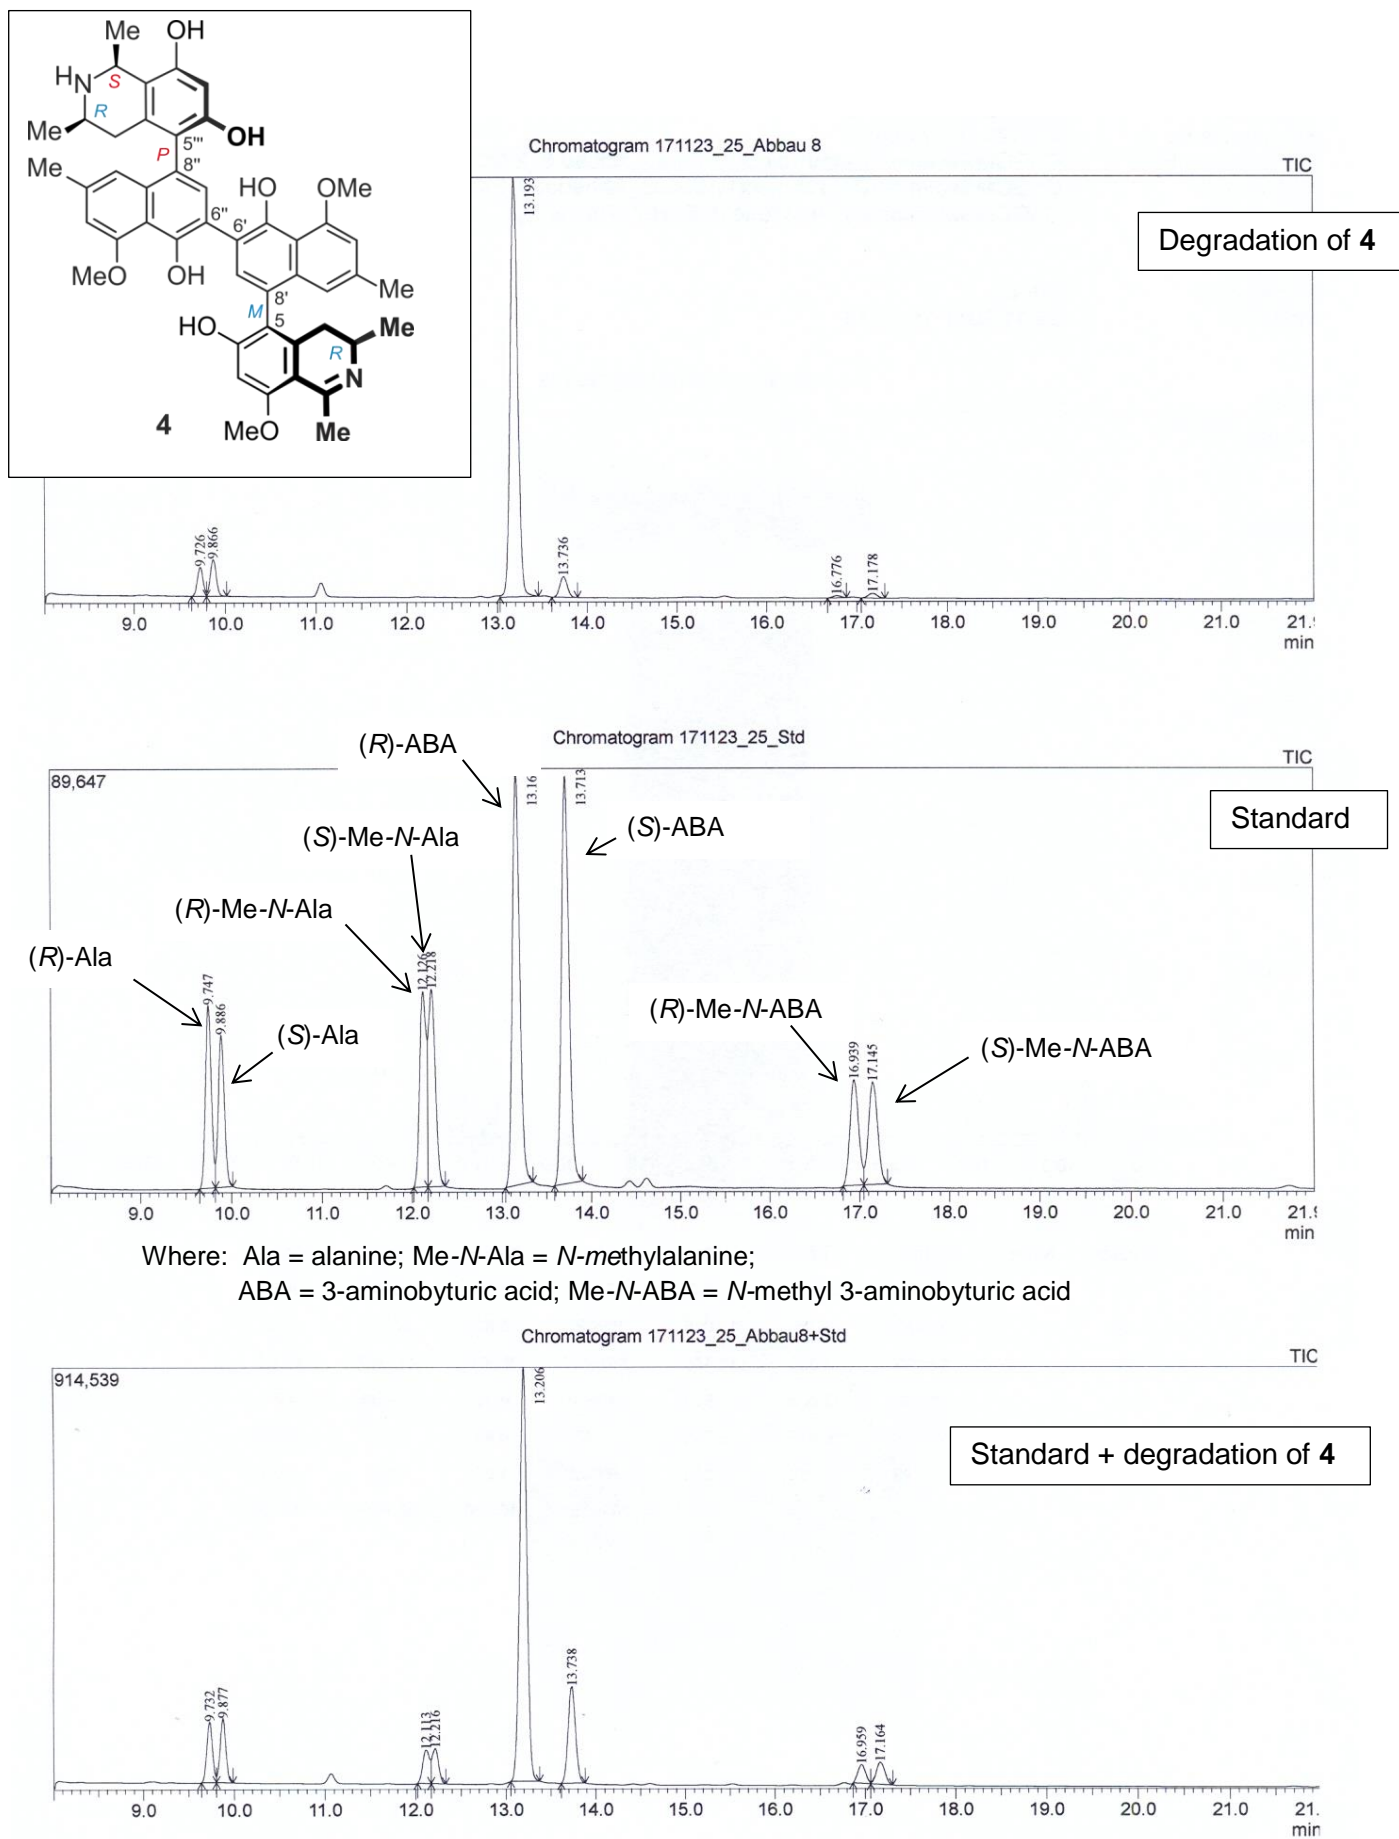

**Fig. S46** Results of the oxidative degradation of compound **4**

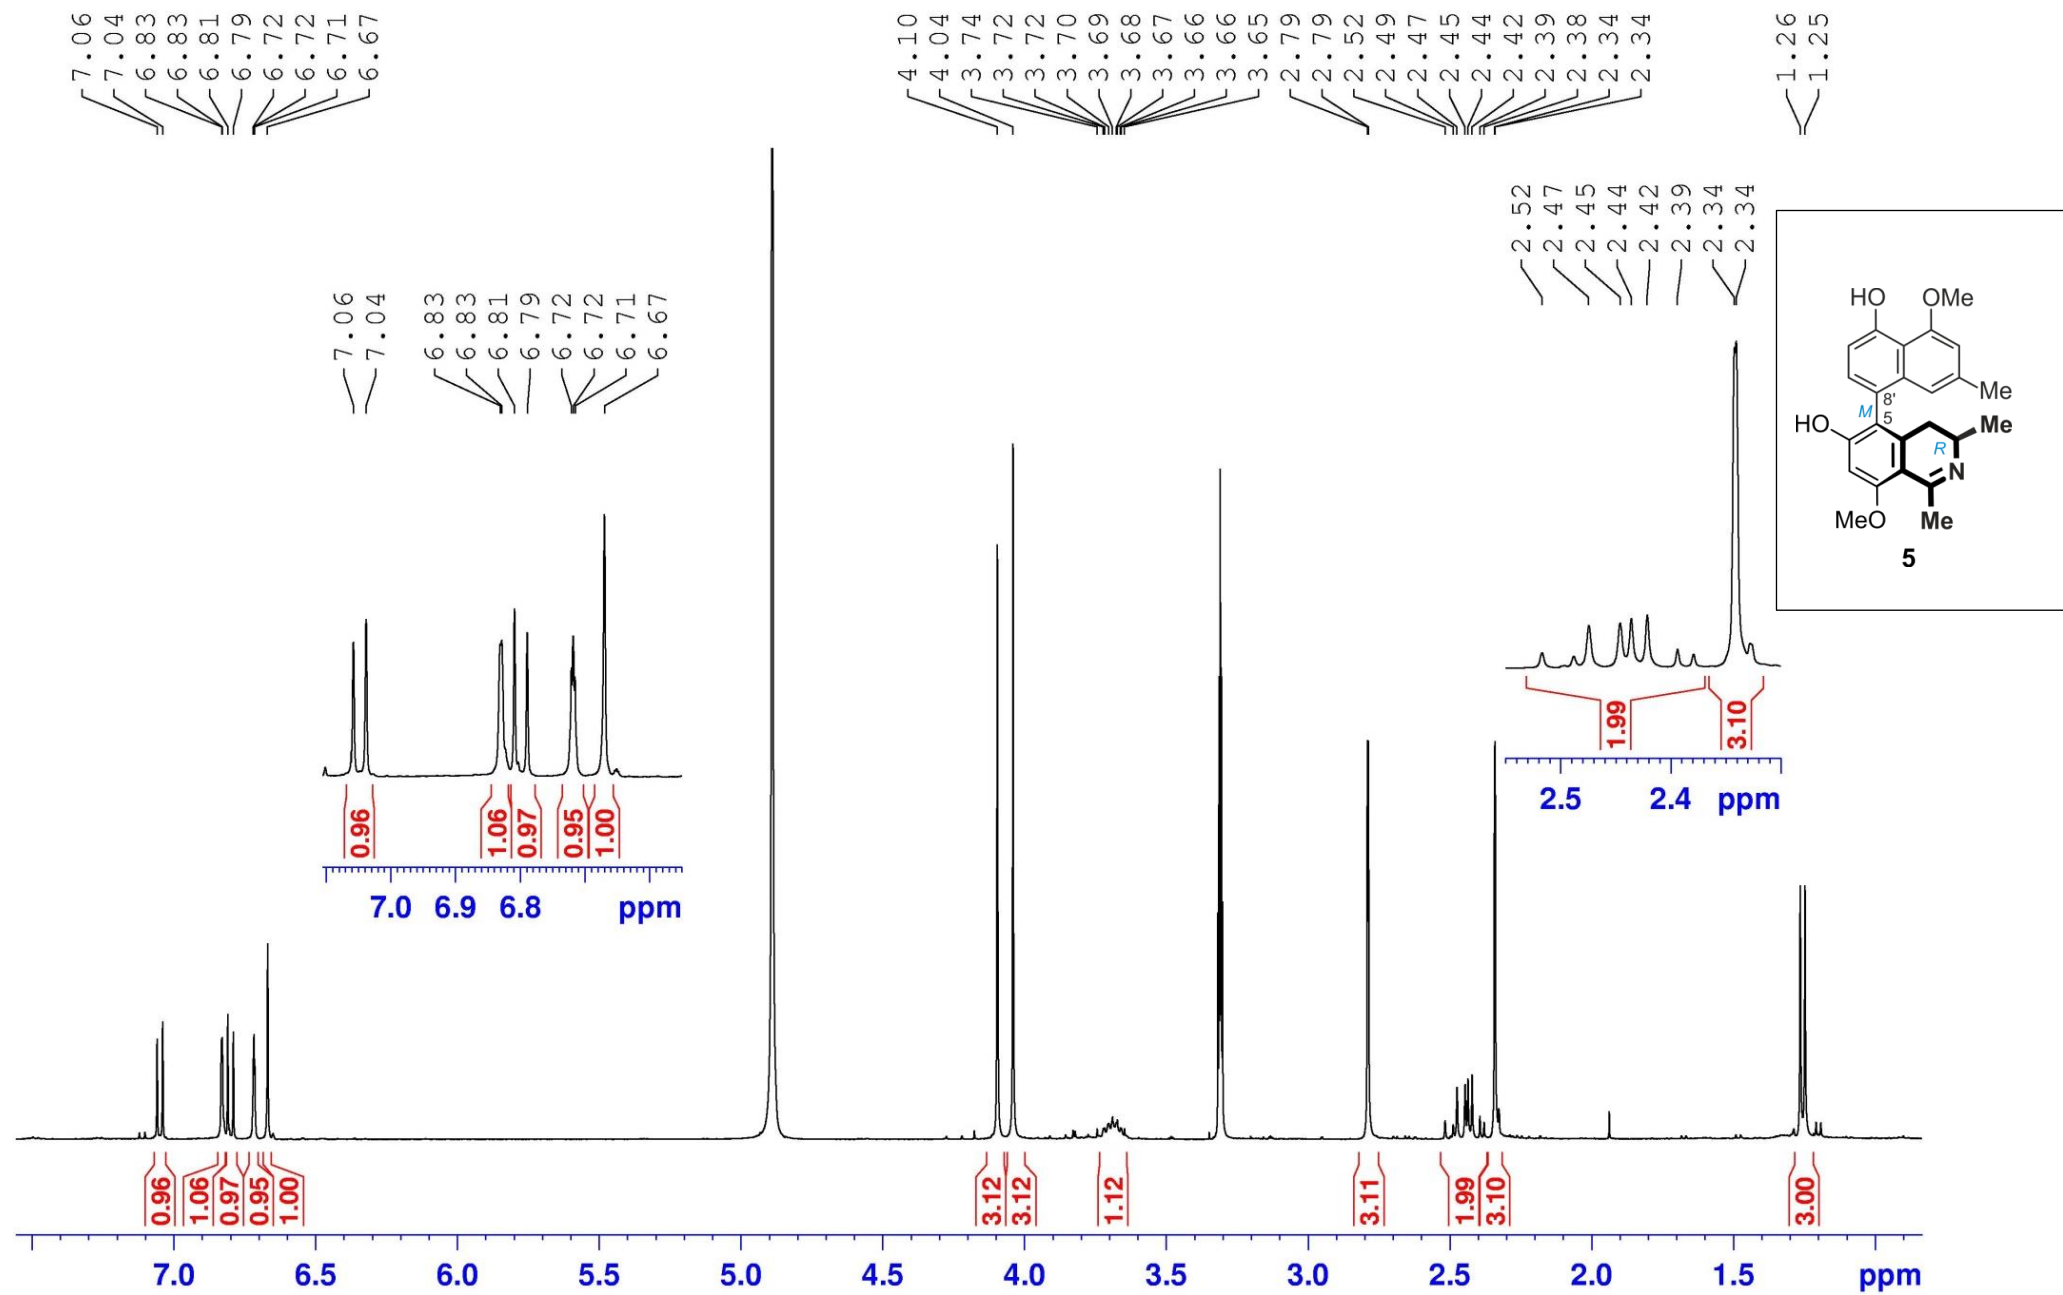

Fig. S47  $^1\text{H}$  NMR spectrum of compound **5** in methanol- $d_4$



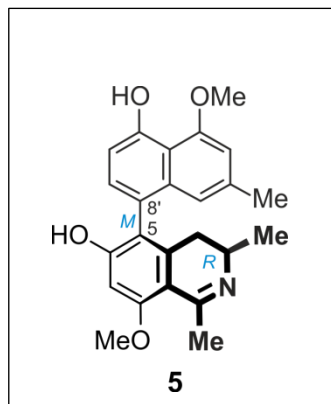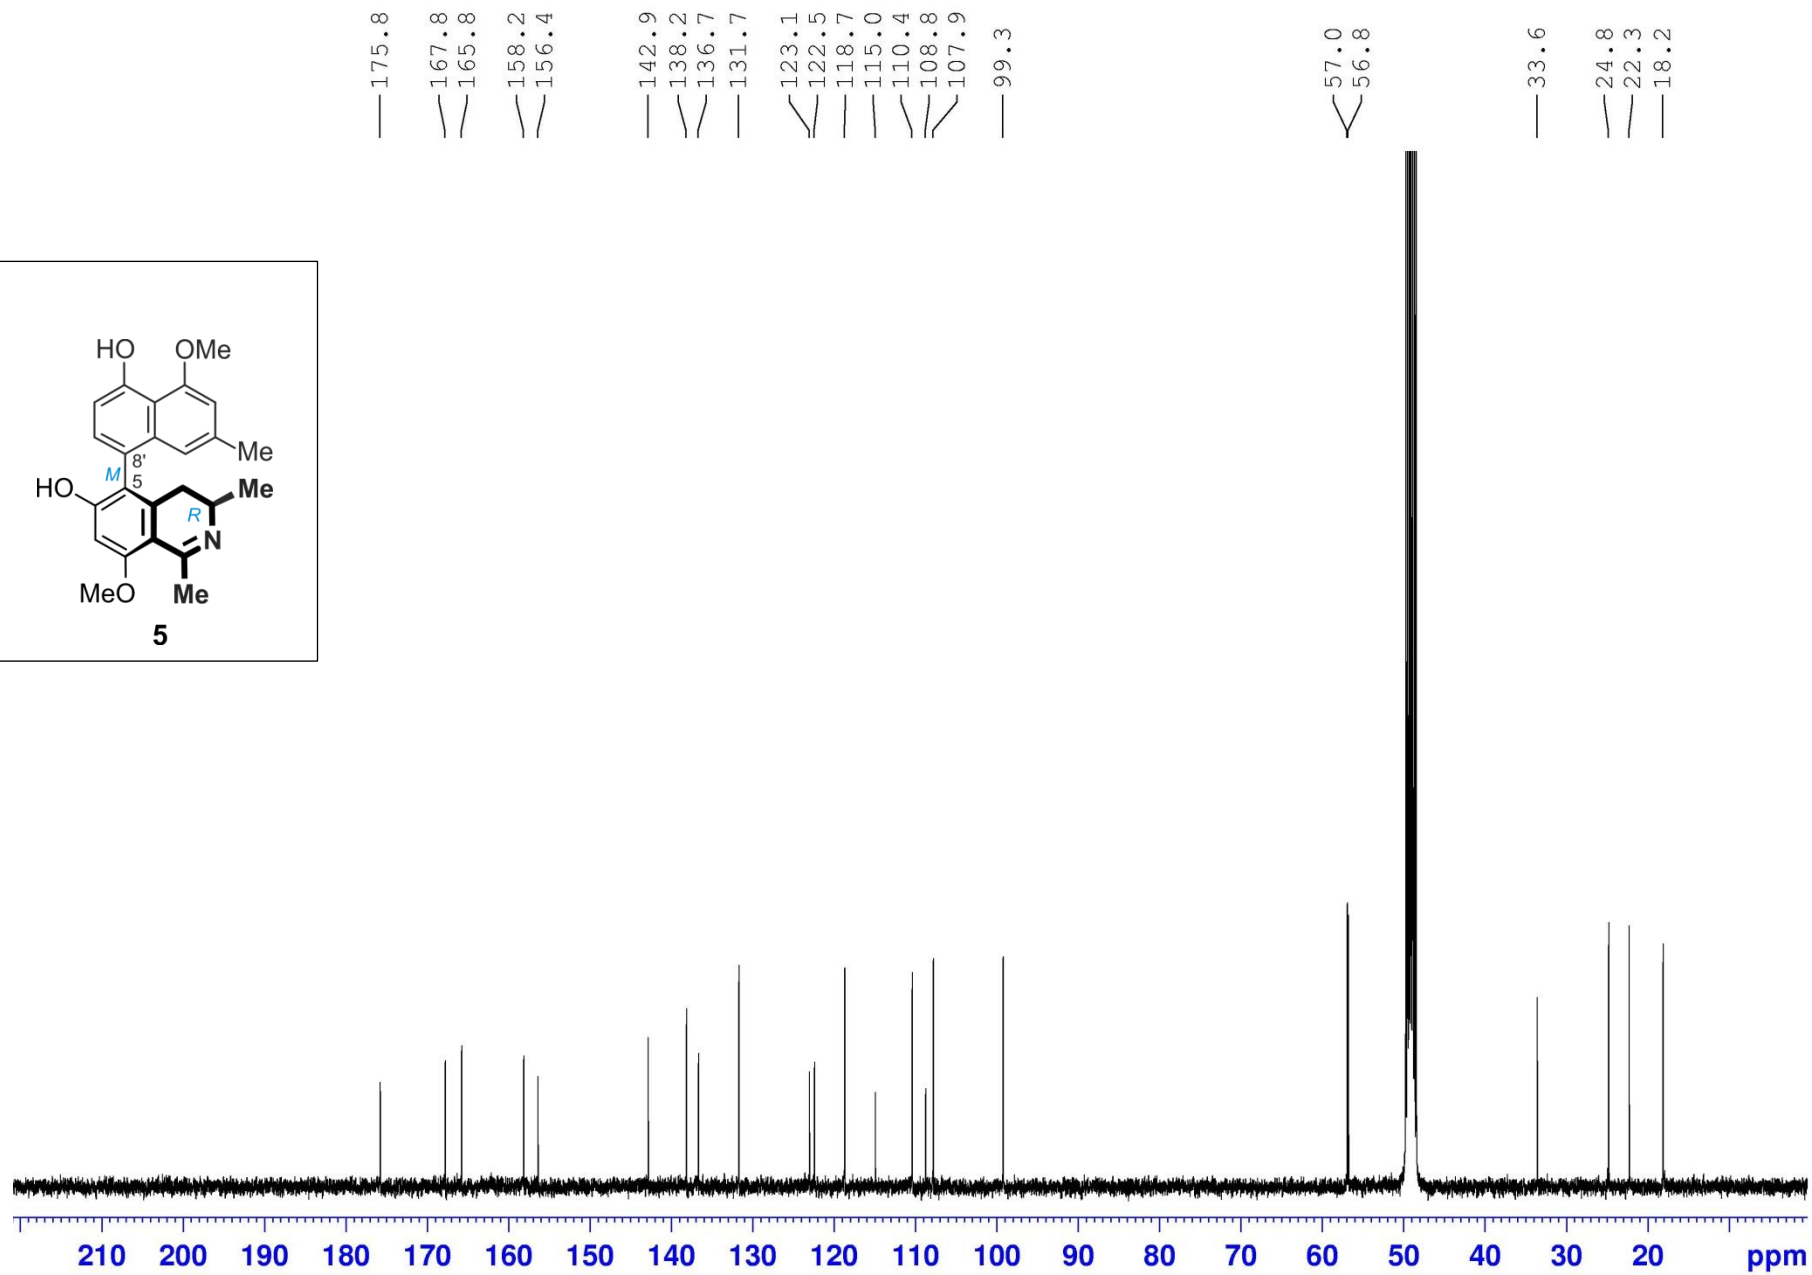

Fig. S48  $^{13}\text{C}$  NMR spectrum of compound **5** in methanol- $d_4$

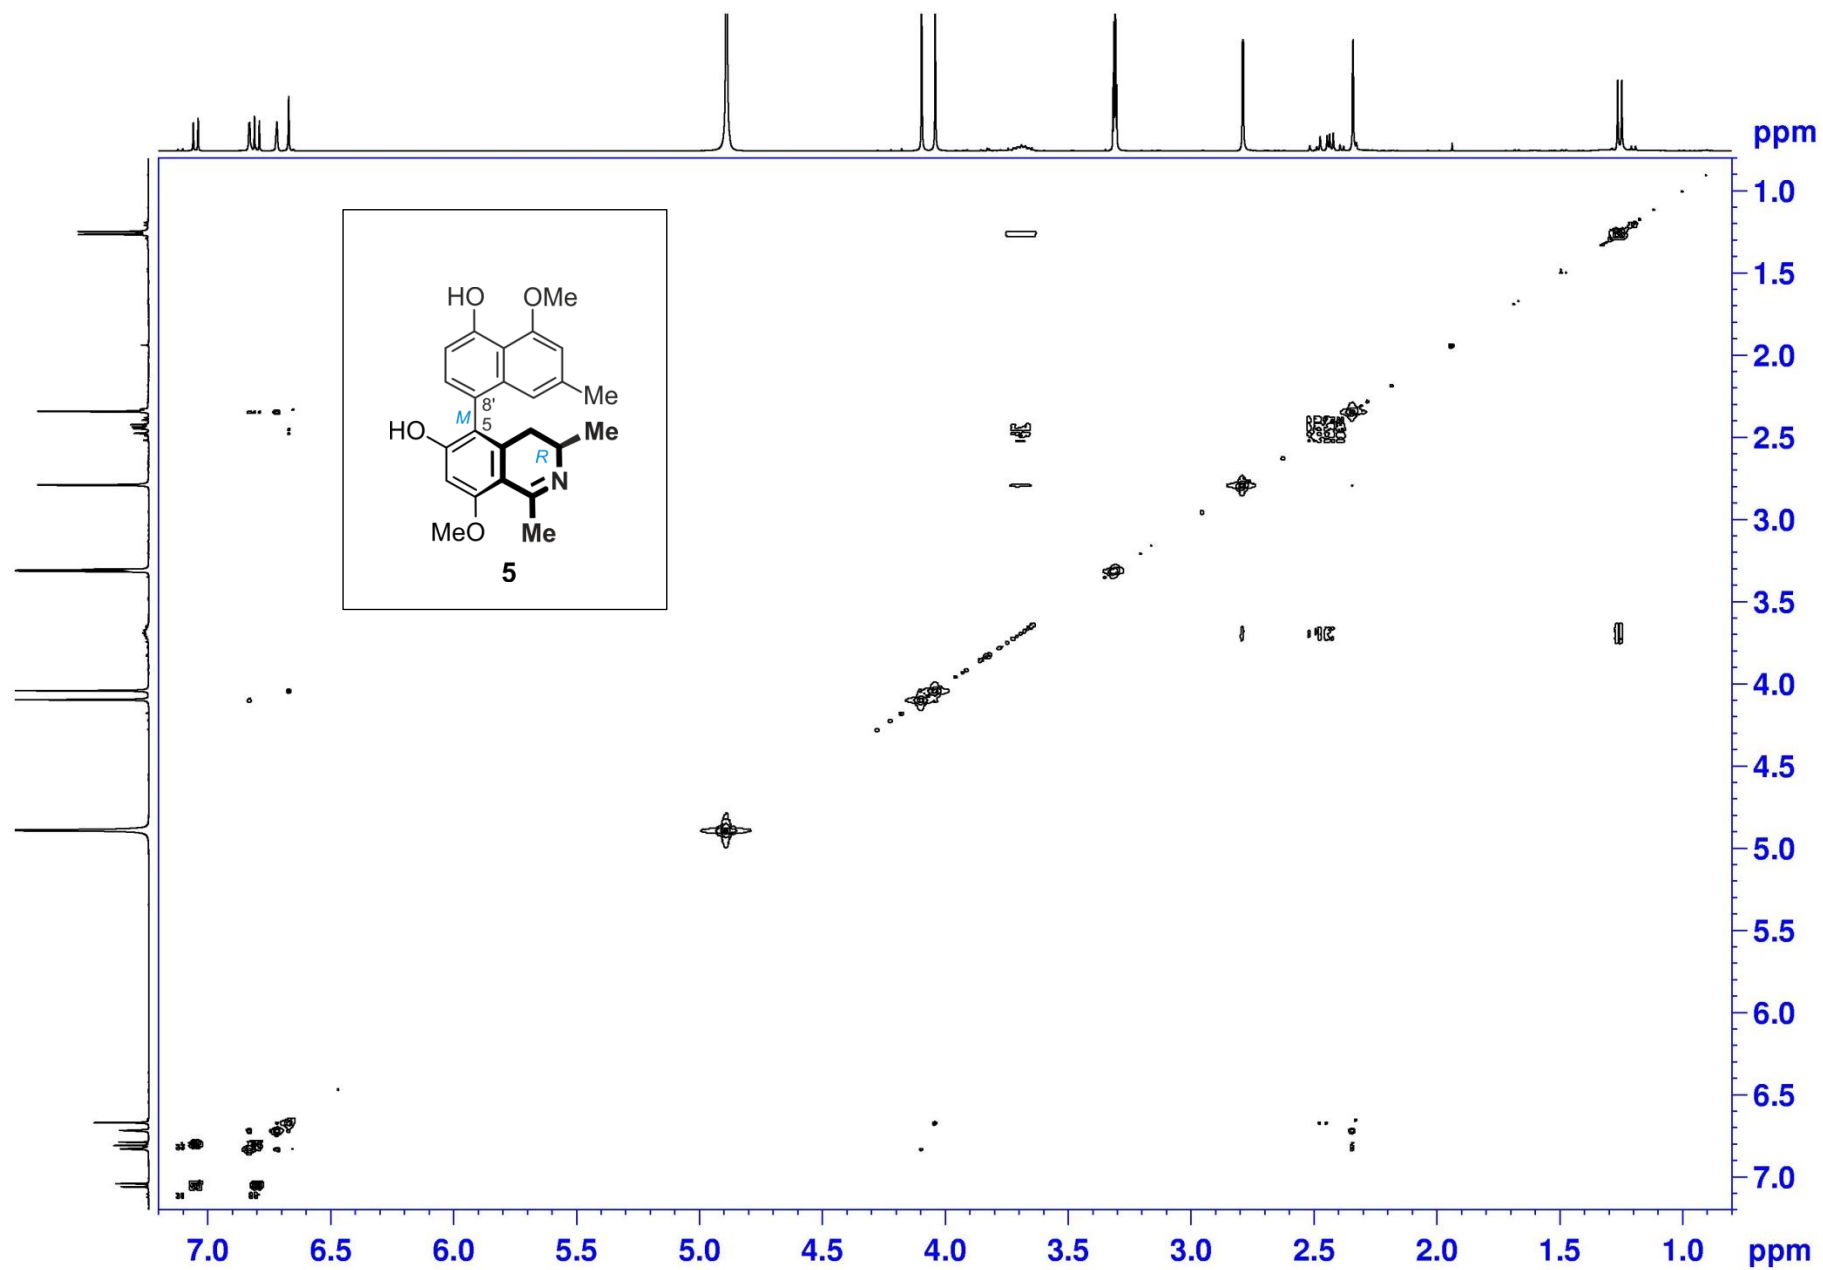

Fig. S49 COSY NMR spectrum of compound **5** in methanol- $d_4$

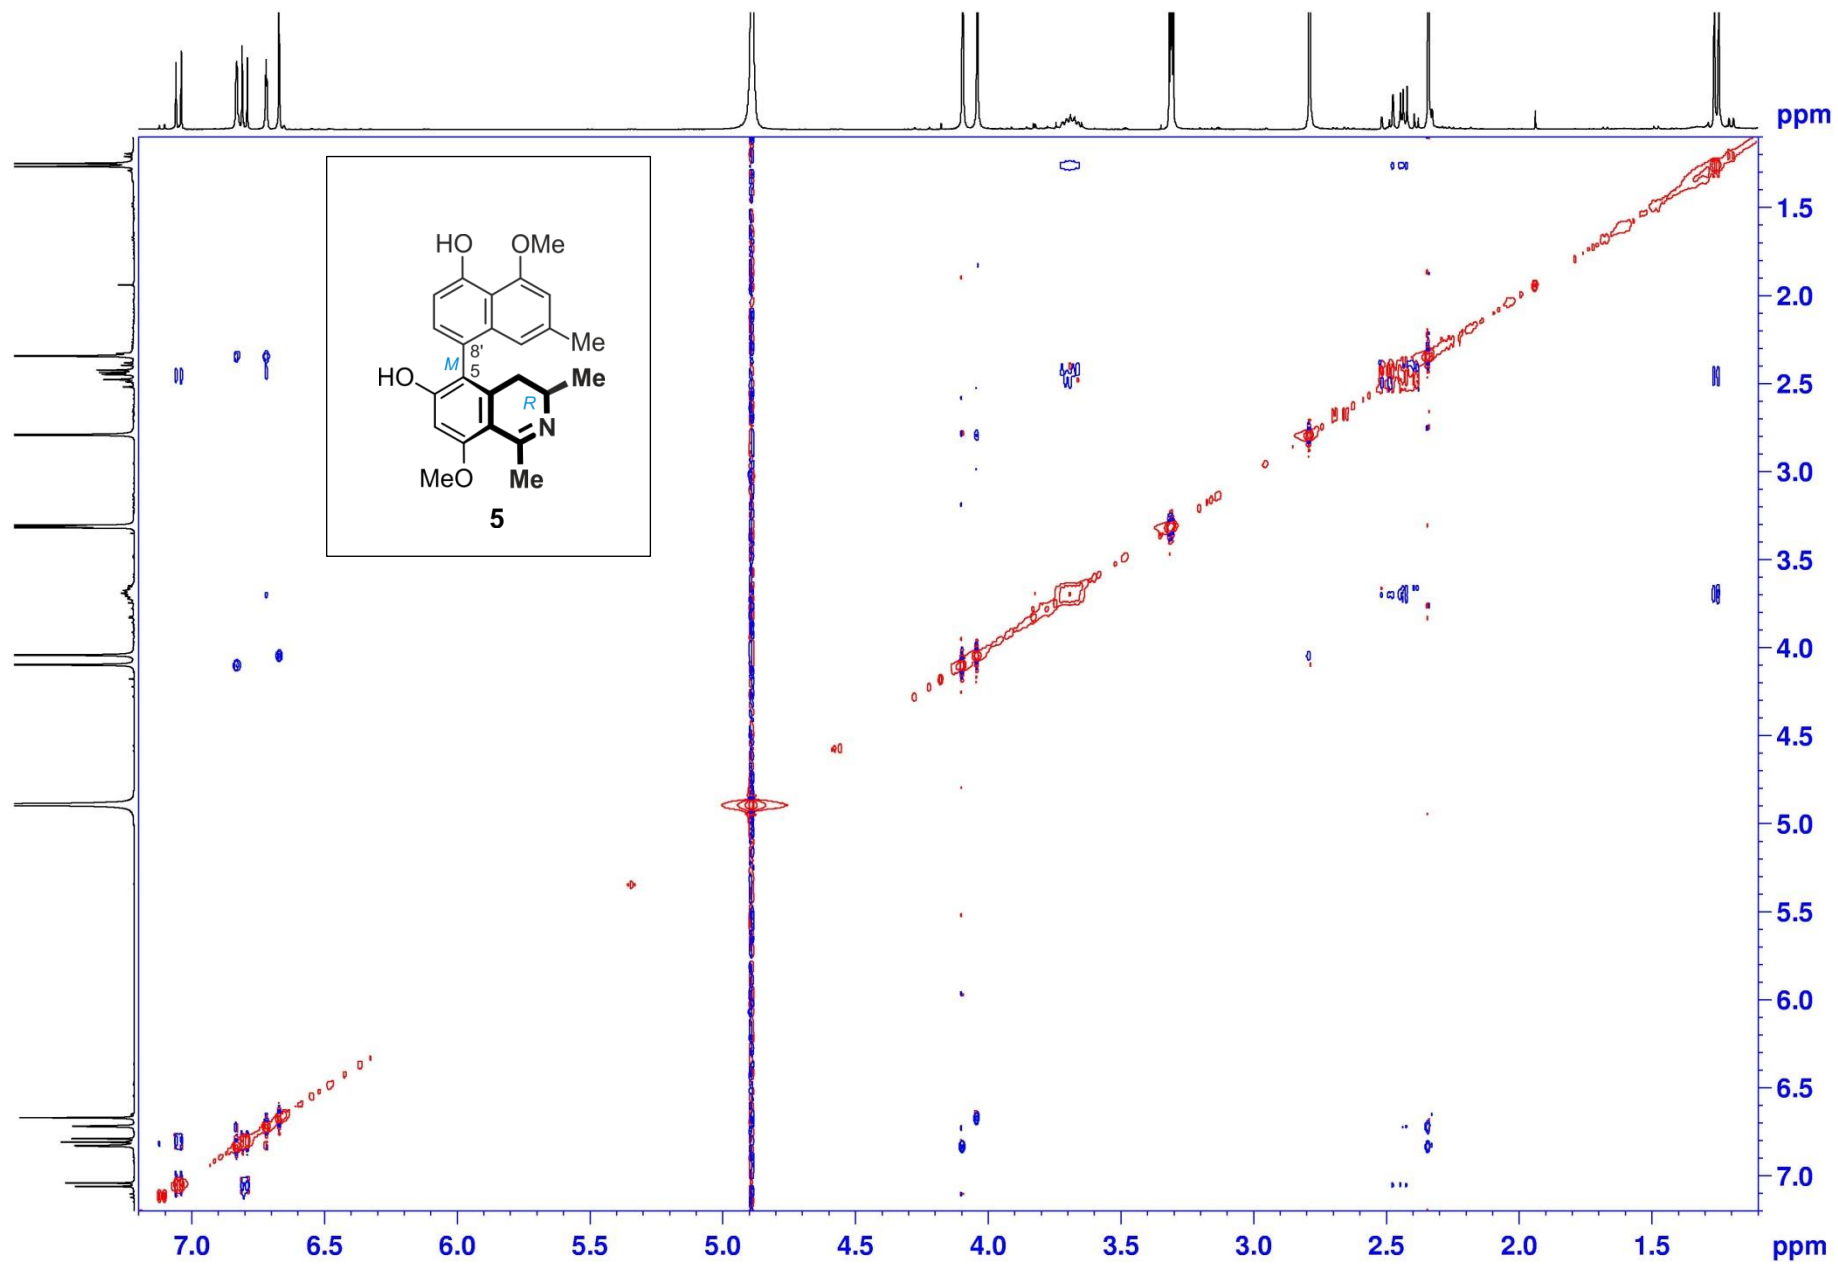

Fig. S50 NOESY NMR spectrum of compound **5** in methanol- $d_4$

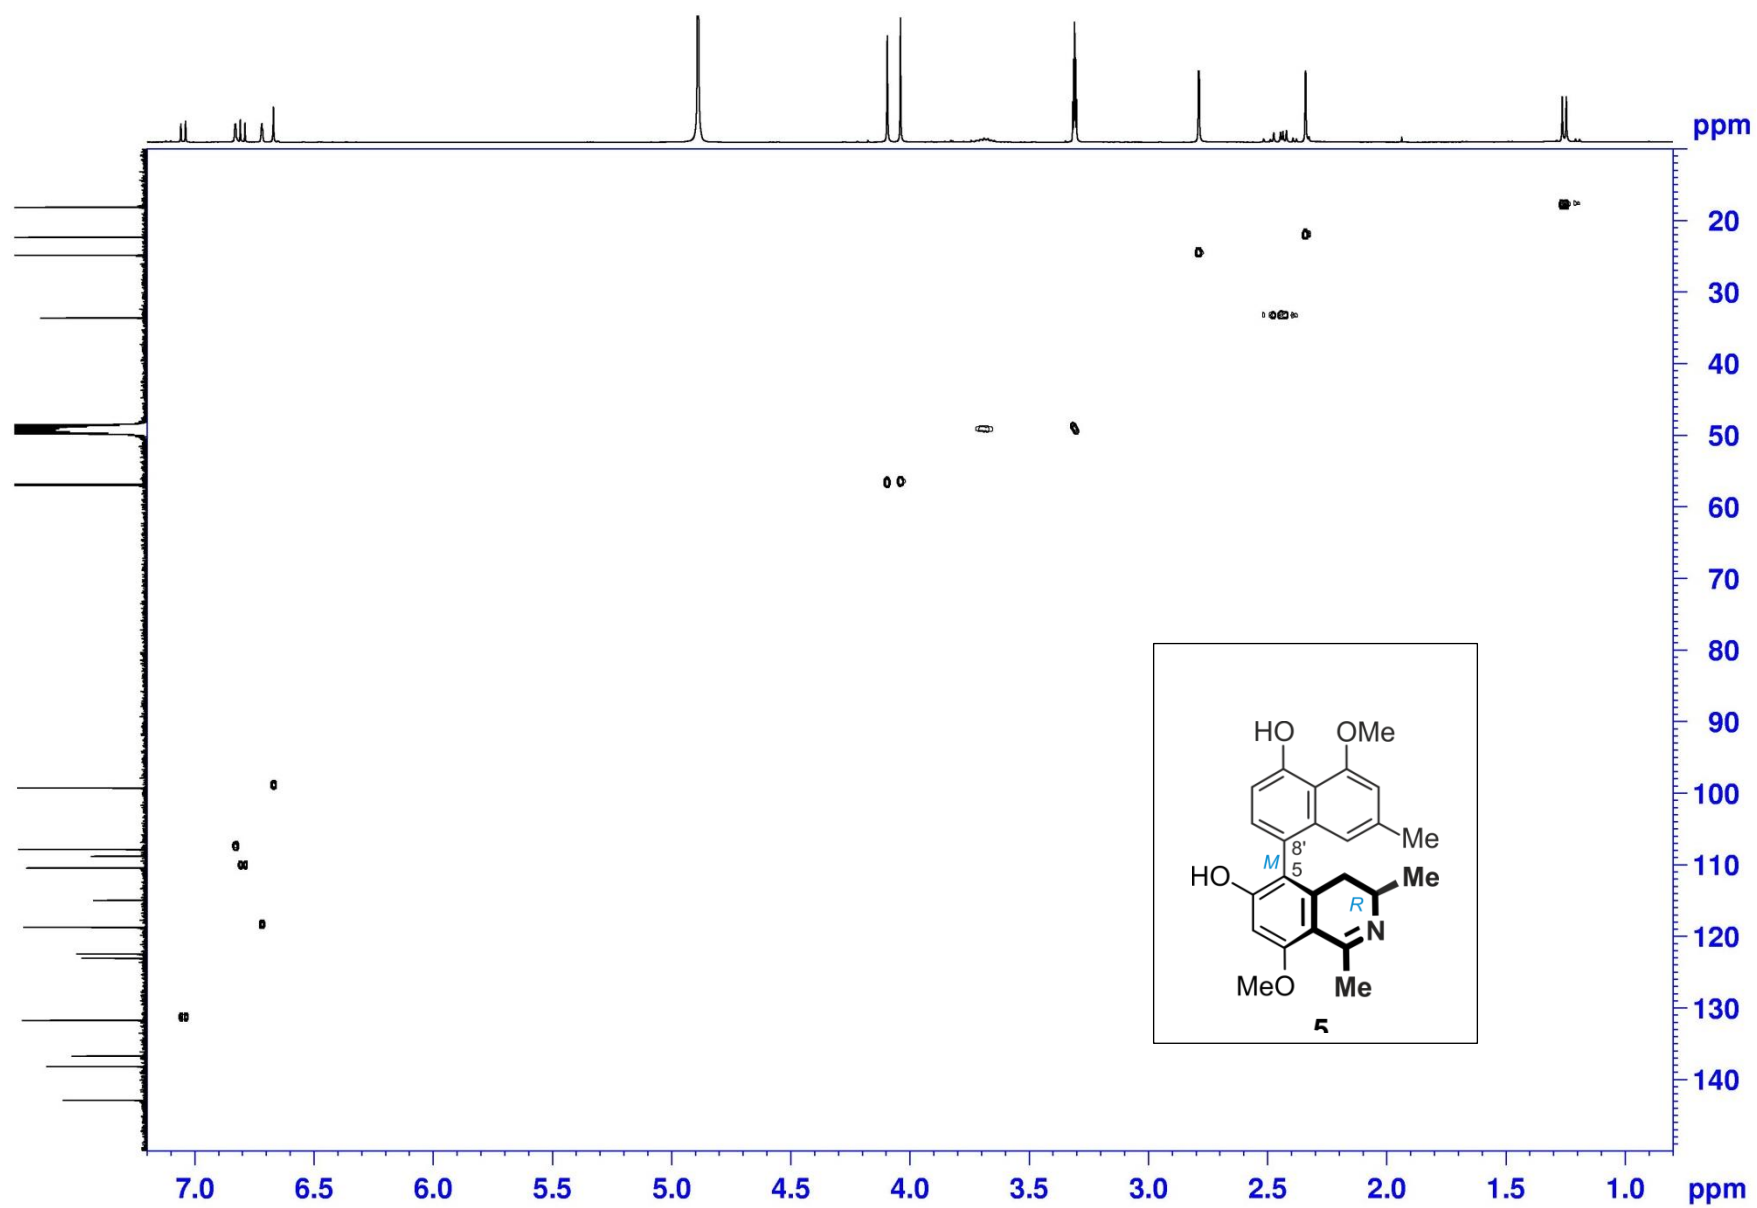

Fig. S51 HSQC NMR spectrum of compound **5** in methanol- $d_4$

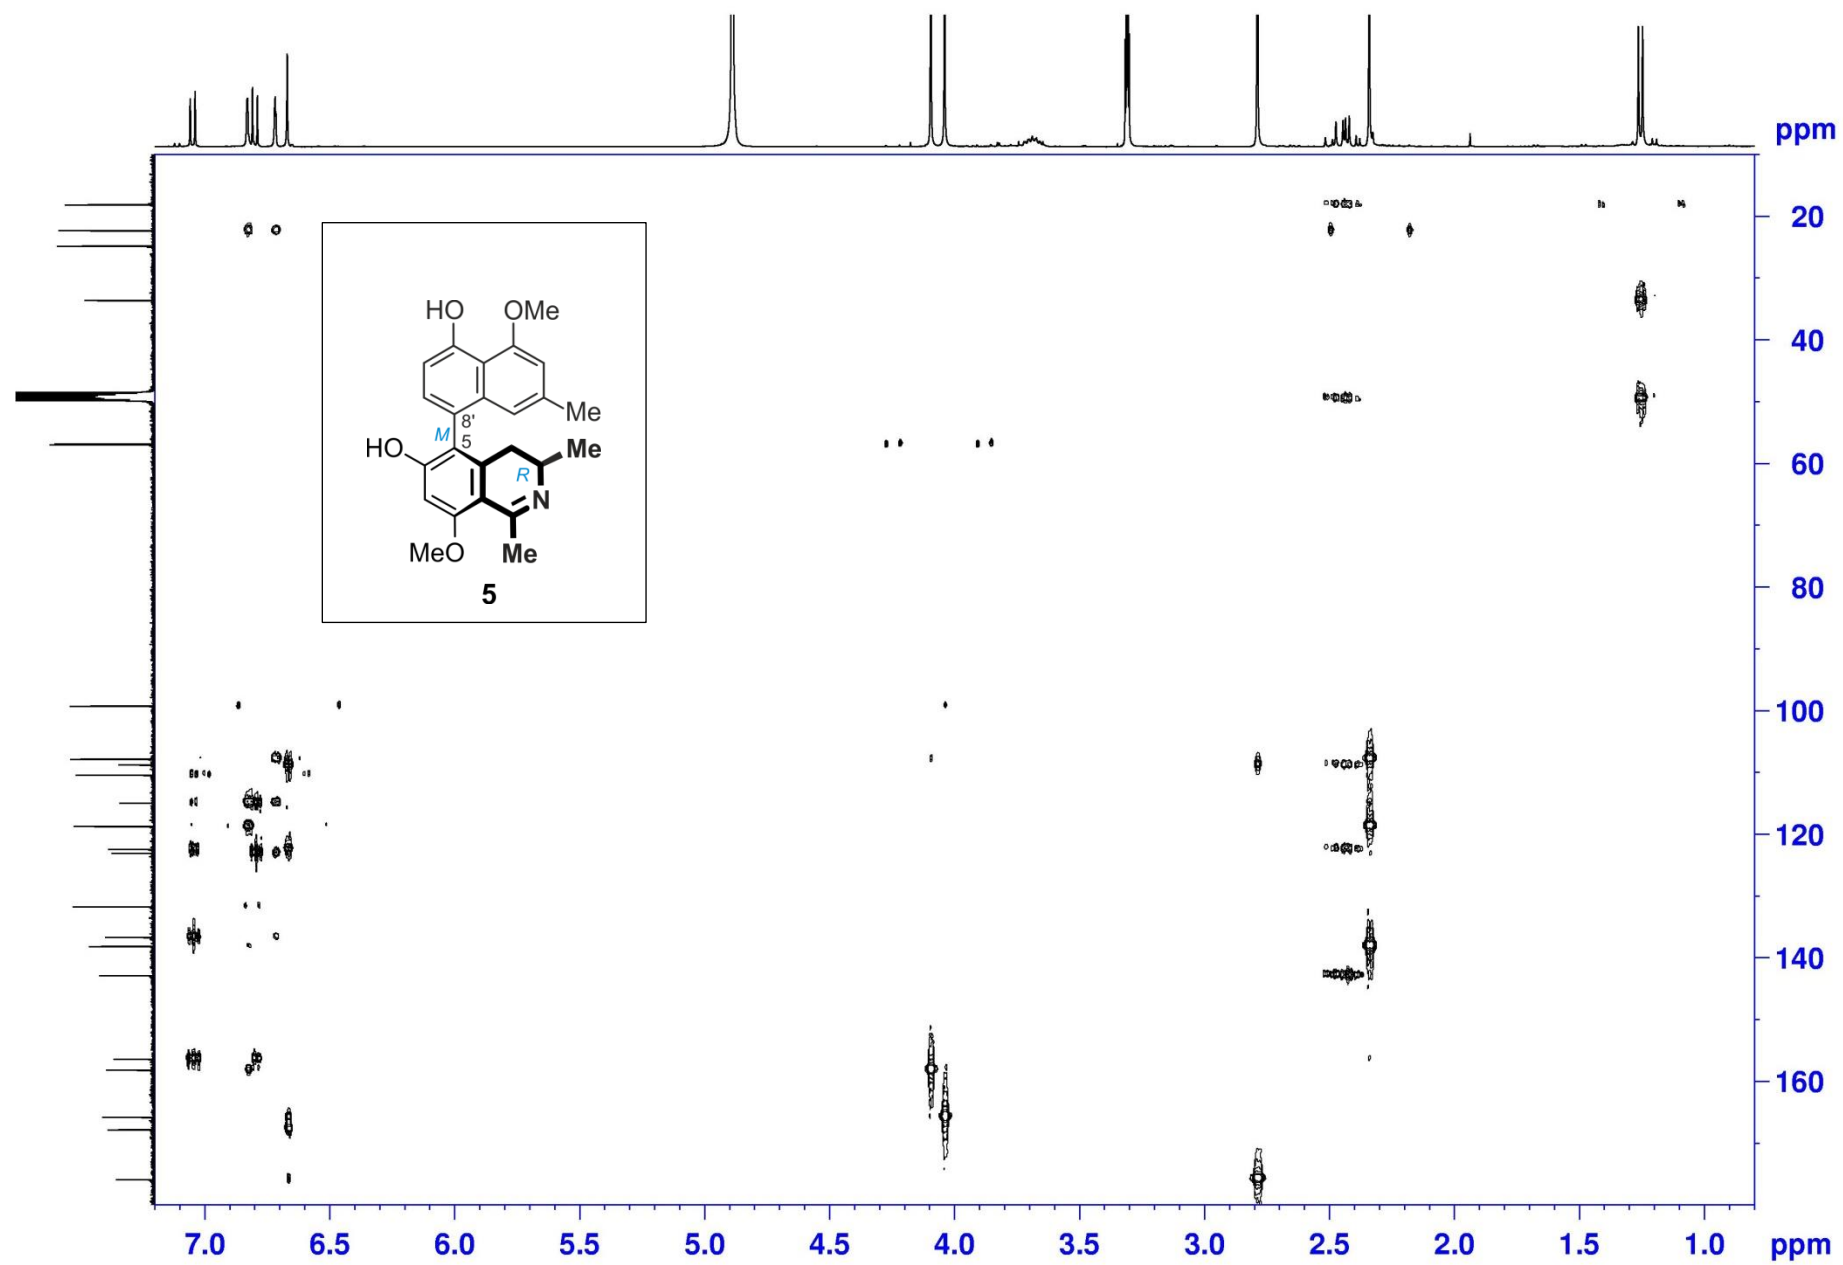

Fig. S52 HMBC NMR spectrum of compound **5** in methanol- $d_4$

## Mass Spectrum Molecular Formula Report

## Analysis Info

Analysis Name D:\Data\Spektren2015\2015\_2669\_BRI\_34\_01\_1128.d  
 Method automation\_esi\_tune\_pos\_low\_JA\_MeOH.m  
 Comment Blaise Kimbadi Lombe  
 B03-DCM-1  
 4 pMol/ $\mu$ L in MeOH

Acquisition Date 22.12.2015 11:25:32  
 Operator Administrator  
 Instrument micrOTOF 88

## Acquisition Parameter

|             |          |                |          |                    |        |
|-------------|----------|----------------|----------|--------------------|--------|
| Source Type | ESI      | Ion Polarity   | Positive | Set Corrector Fill | 48 V   |
| Scan Range  | n/a      | Capillary Exit | 100.0 V  | Set Pulsar Pull    | 804 V  |
| Scan Begin  | 50 m/z   | Hexapole RF    | 80.0 V   | Set Pulsar Push    | 807 V  |
| Scan End    | 3500 m/z | Skimmer 1      | 50.0 V   | Set Reflector      | 1700 V |
|             |          | Hexapole 1     | 23.0 V   | Set Flight Tube    | 8600 V |
|             |          |                |          | Set Detector TOF   | 2240 V |

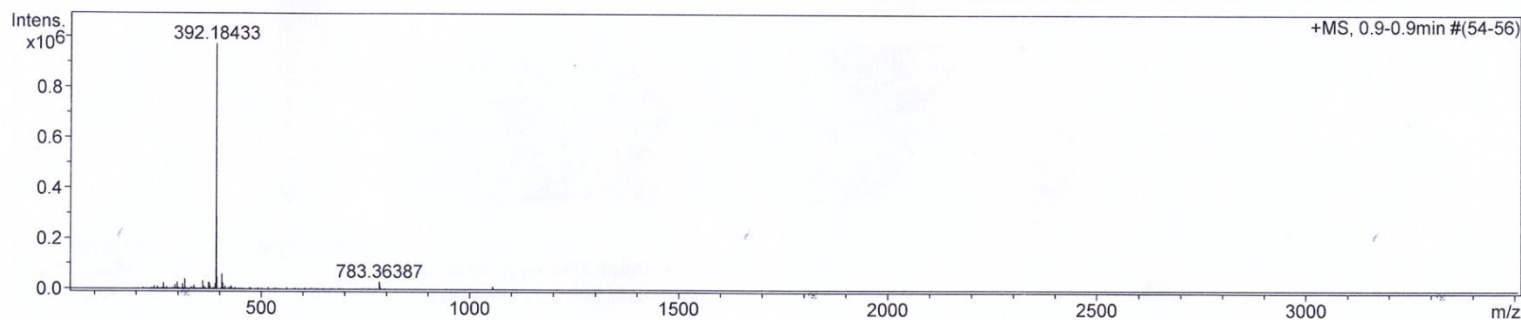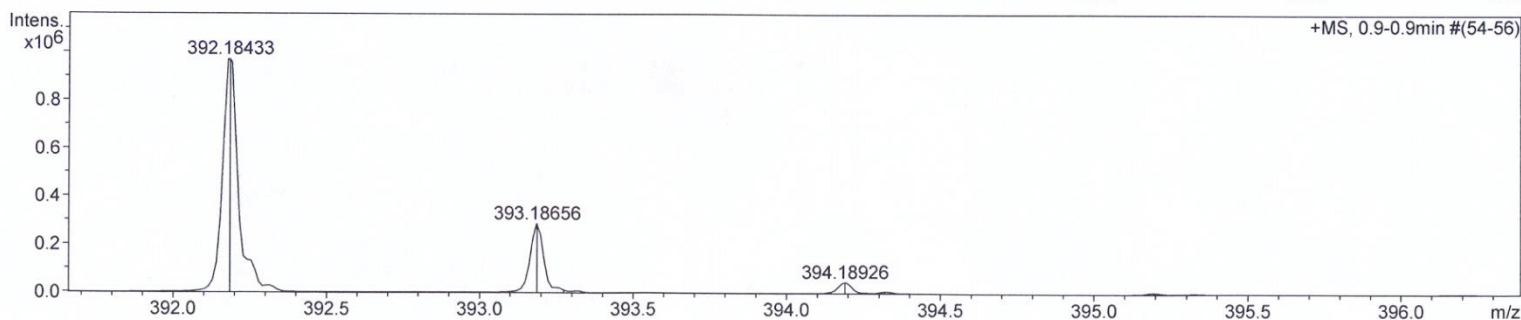

| Sum Formula       | Sigma | m/z       | Err [ppm] | Mean Err [ppm] | rdb   | N Rule | e <sup>-</sup> |
|-------------------|-------|-----------|-----------|----------------|-------|--------|----------------|
| C 24 H 26 N 1 O 4 | 0.01  | 392.18563 | 3.33      | 4.01           | 12.50 | ok     | even           |

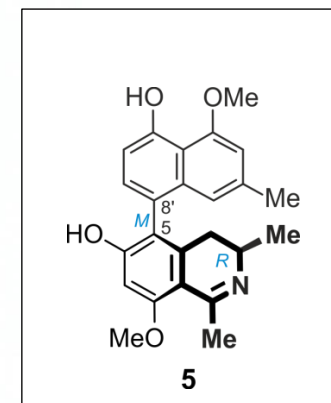

Fig. S53 HRESIMS spectrum of compound 5

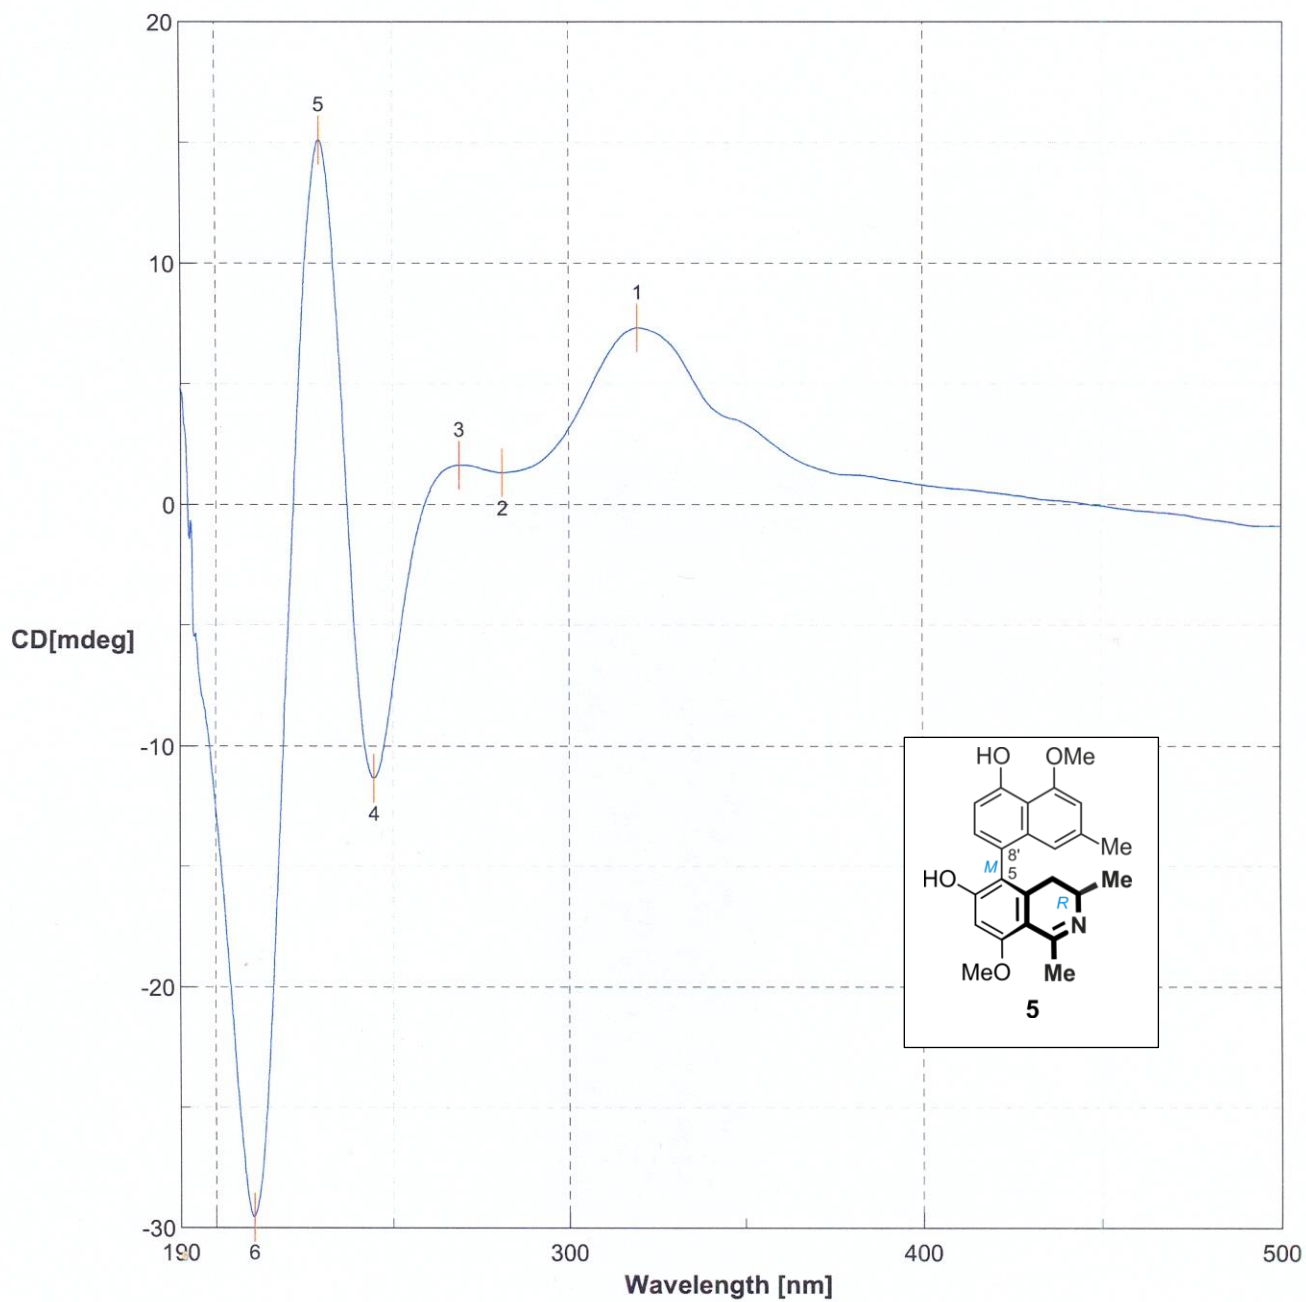

Date/Time 07.12.2015 14:49  
 Operator kimbadi  
 File Name BO3-DCM-1\_0#005.jws  
 Sample Name BO3-DCM-1\_0.5mm\_MeOH  
 Comment offline

| No. | nm    | CD[mdeg] | No. | nm    | CD[mdeg] | No. | nm    | CD[mdeg] |
|-----|-------|----------|-----|-------|----------|-----|-------|----------|
| 1   | 319.6 | 7.31576  | 2   | 281.1 | 1.31883  | 3   | 268.8 | 1.63188  |
| 4   | 244.6 | -11.3299 | 5   | 229.3 | 15.1054  | 6   | 210.8 | -29.5241 |

**Fig. S54** CD spectrum of compound **5** in methanol

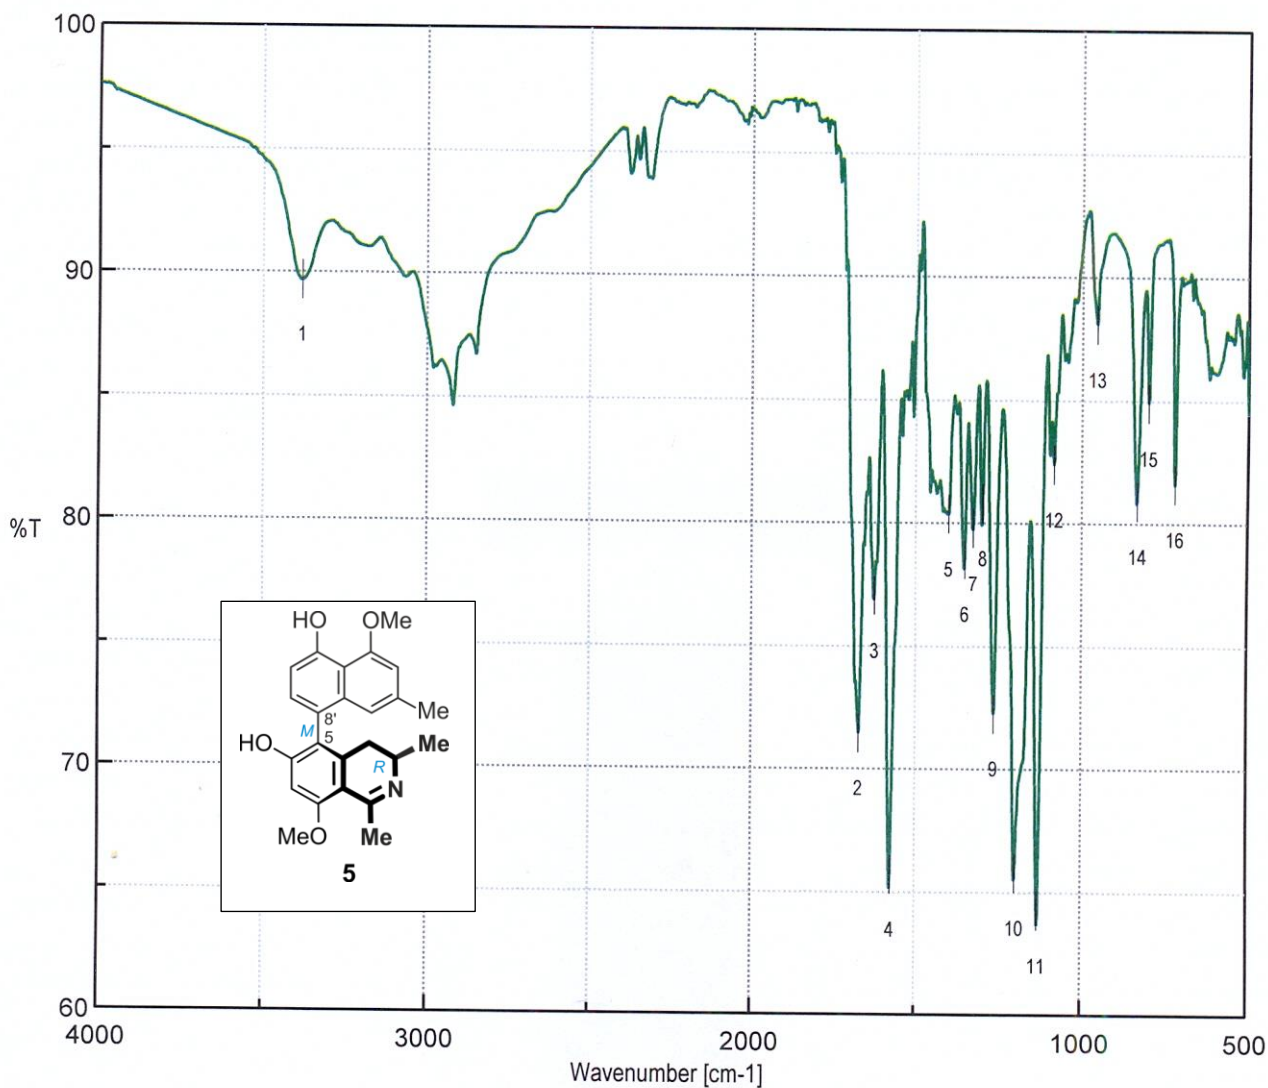

Results of Peak Find

| No. | Position | Intensity | No. | Position | Intensity |
|-----|----------|-----------|-----|----------|-----------|
| 1   | 3381.57  | 89.6804   | 2   | 1671.02  | 71.4524   |
| 3   | 1624.73  | 77.0215   | 4   | 1574.59  | 65.7072   |
| 5   | 1400.07  | 80.3554   | 6   | 1351.86  | 78.505    |
| 7   | 1325.82  | 79.7662   | 8   | 1296.89  | 80.7913   |
| 9   | 1264.11  | 72.2617   | 10  | 1197.58  | 65.779    |
| 11  | 1132.01  | 64.2582   | 12  | 1083.8   | 82.3768   |
| 13  | 955.555  | 88.0809   | 14  | 832.133  | 80.8874   |
| 15  | 799.35   | 84.884    | 16  | 720.282  | 81.586    |

[Comments]

Sample name BO3-DCM-1  
 Comment drop(MeOH)  
 User Kimbadi  
 Division AK Bringmann  
 Company Uni Würzburg

[Measurement Information]

Model Name FT/IR-4600typeA  
 Serial Number D063461786

Accessory ATR PRO ONE  
 Accessory S/N A070661809  
 Incident angle 45 deg

Measurement Date 20.12.2017 15:20

Light Source Standard  
 Detector TGS  
 Accumulation 16  
 Resolution 4 cm-1  
 Zero Filling On  
 Apodization Cosine  
 Gain Auto (4)  
 Aperture Auto (7.1 mm)  
 Scanning Speed Auto (2 mm/sec)  
 Filter Auto (30000 Hz)

Fig. S55 IR spectrum of compound 5



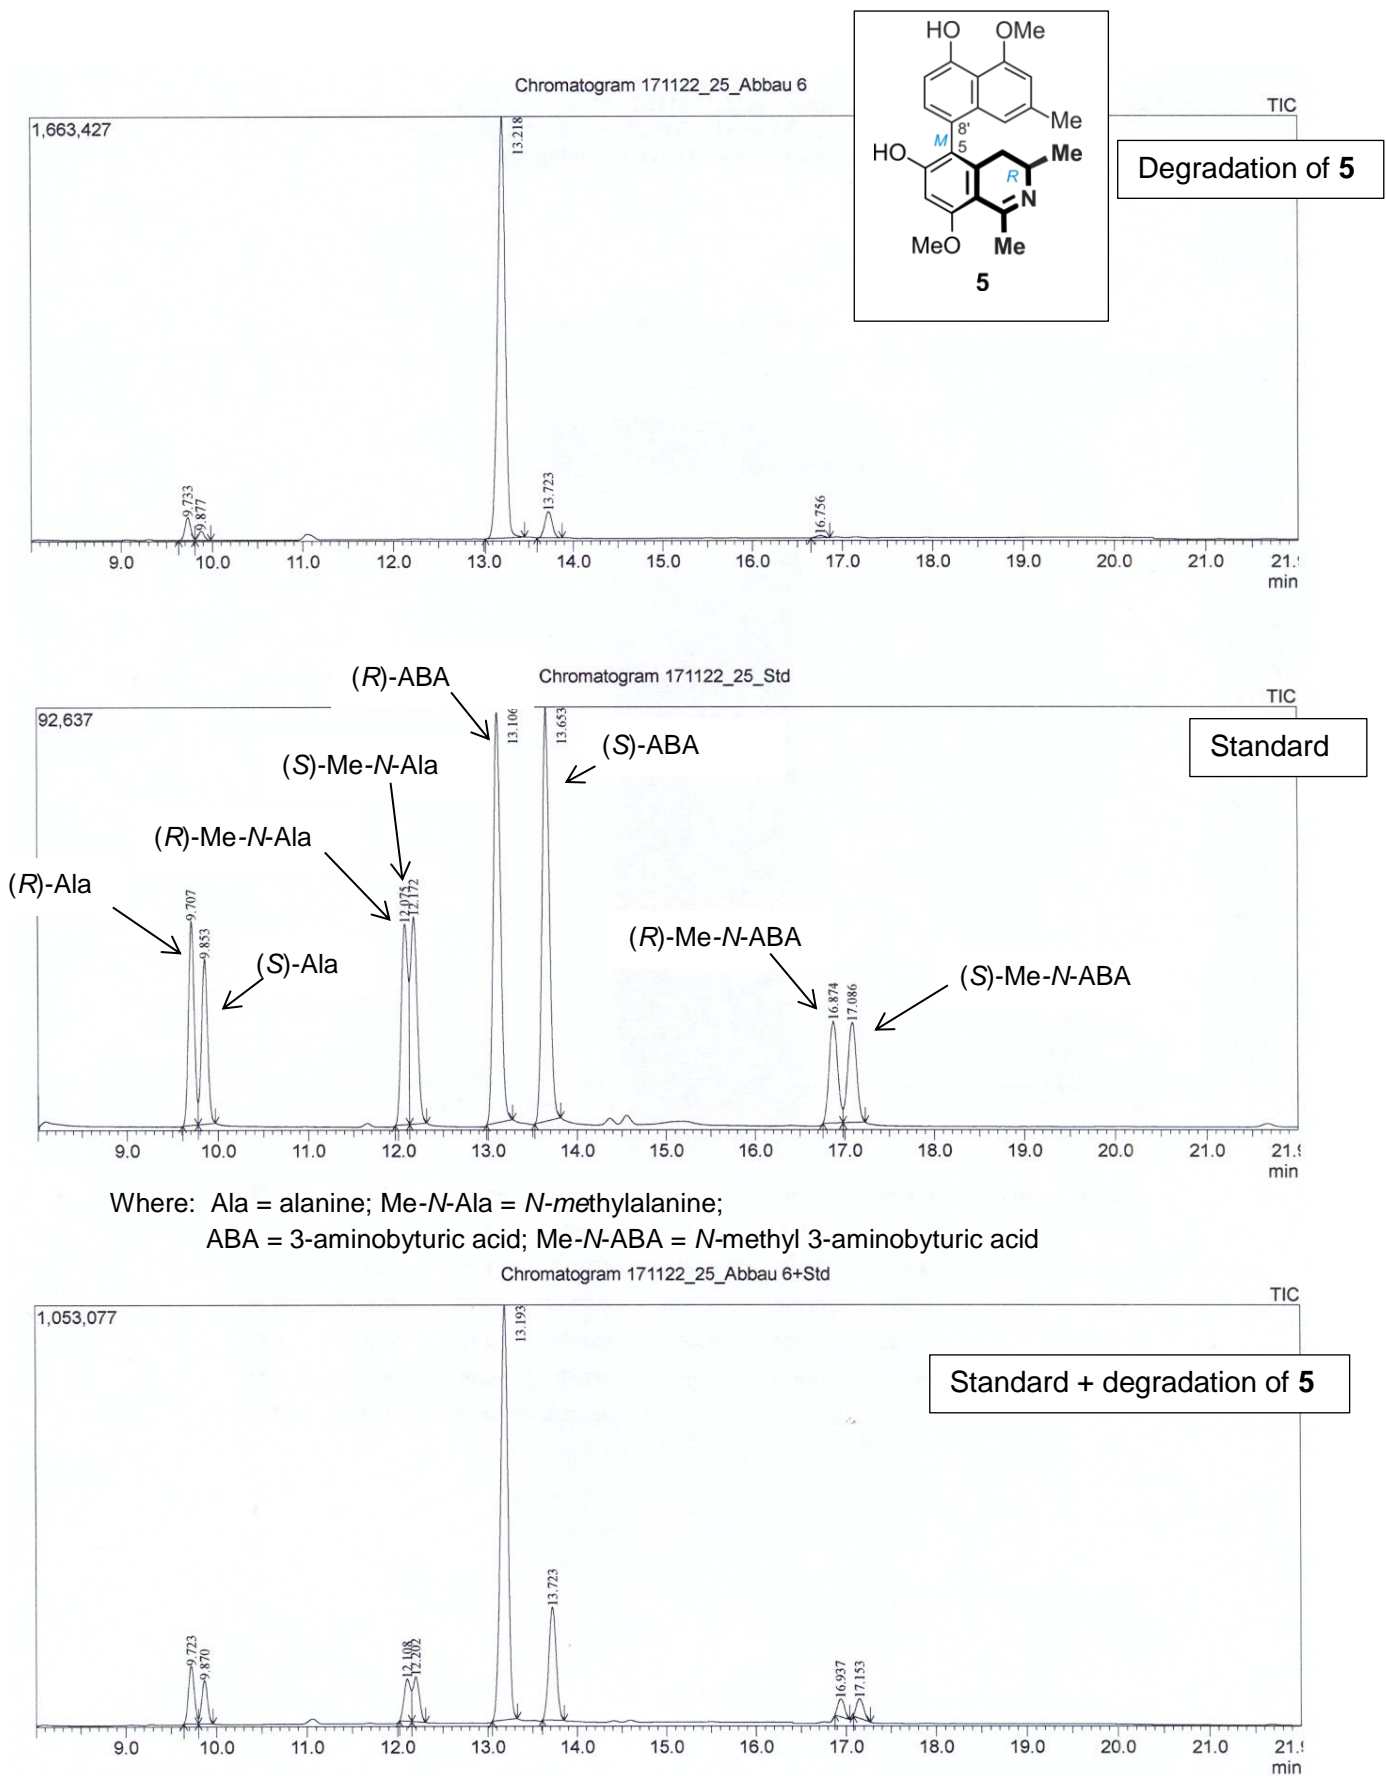

**Fig. S56** Results of the oxidative degradation of compound **5**

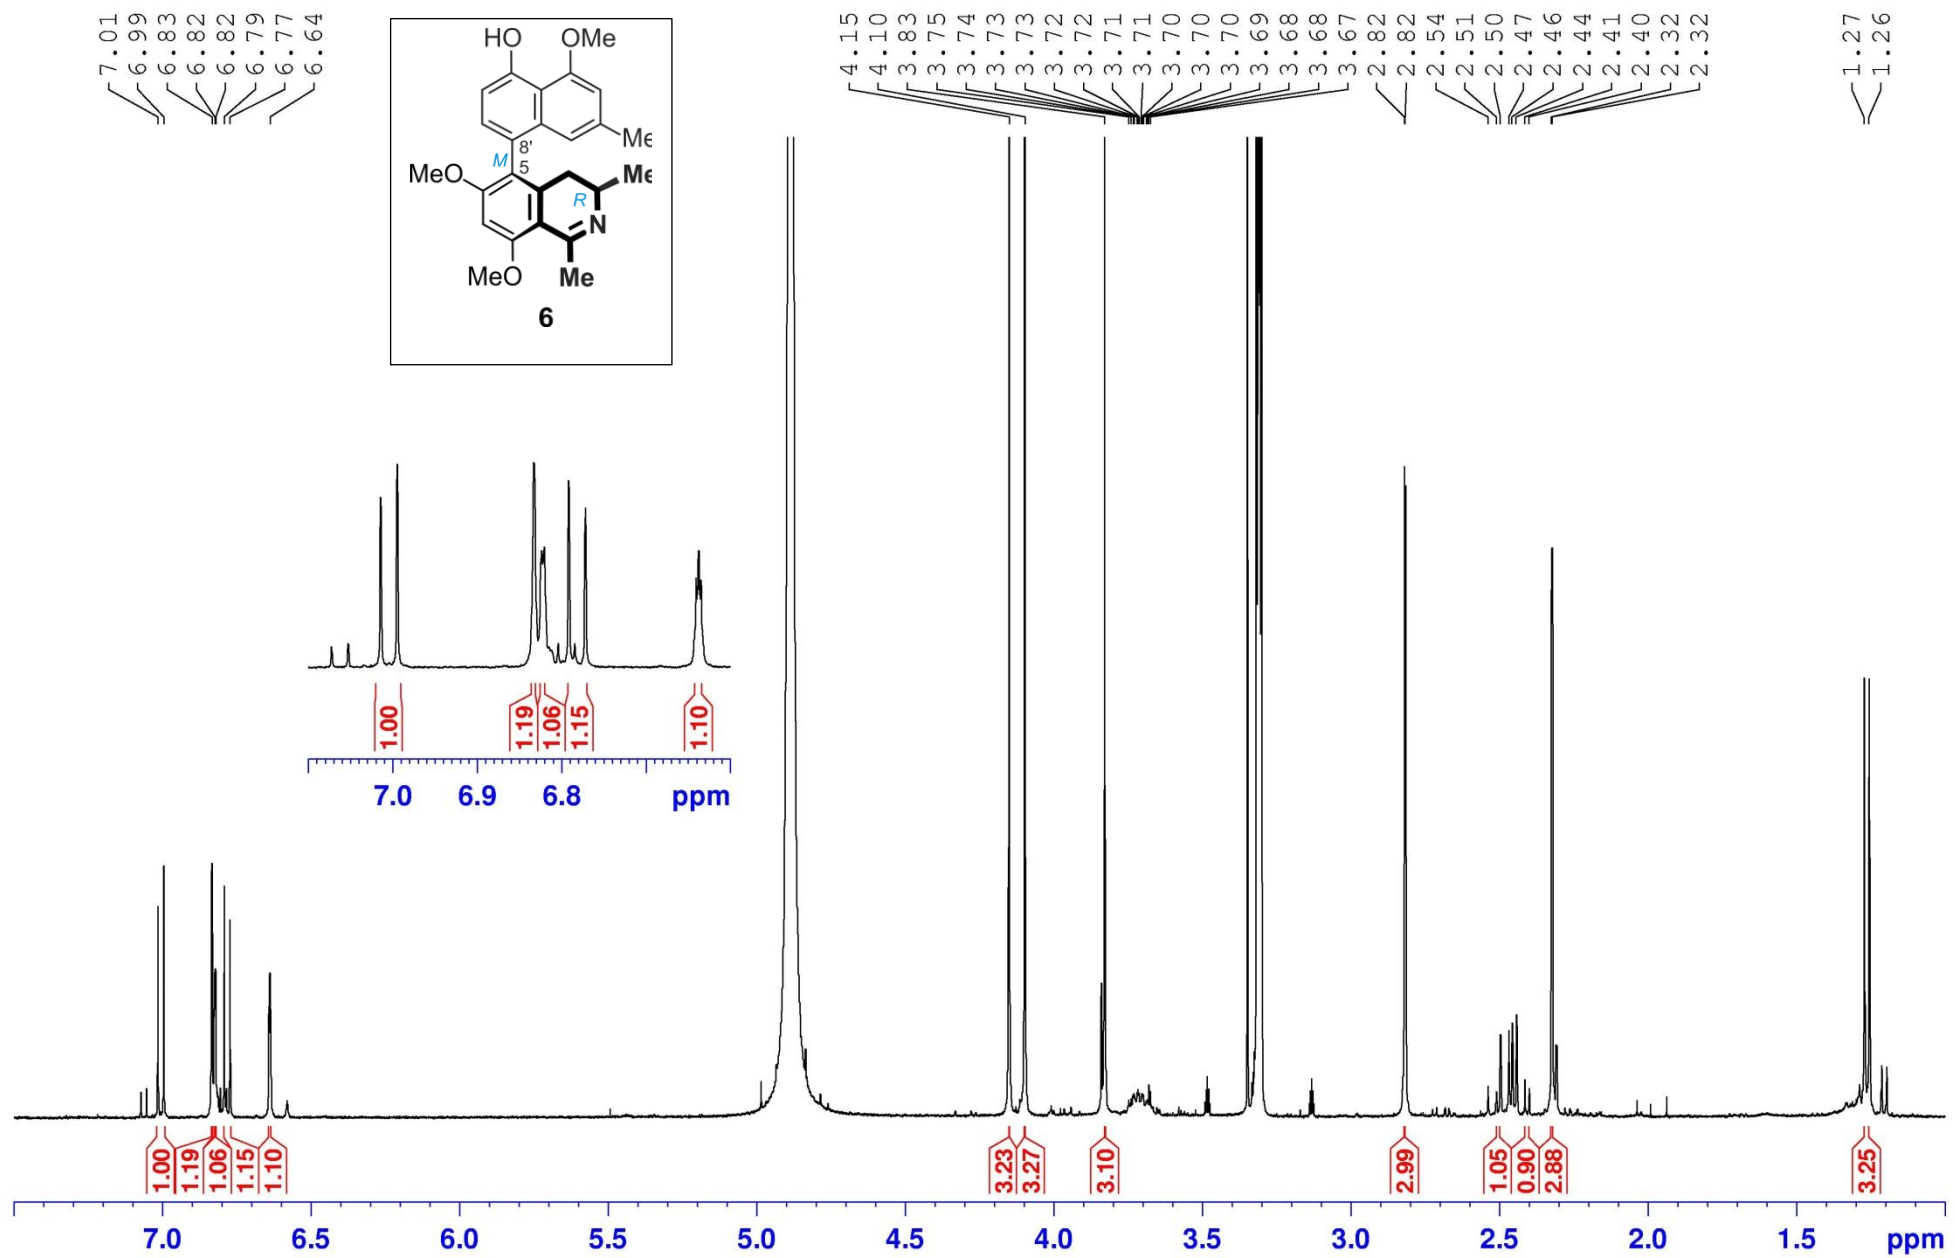

Fig. S57  $^1\text{H}$  NMR spectrum of compound **6** in methanol- $d_4$

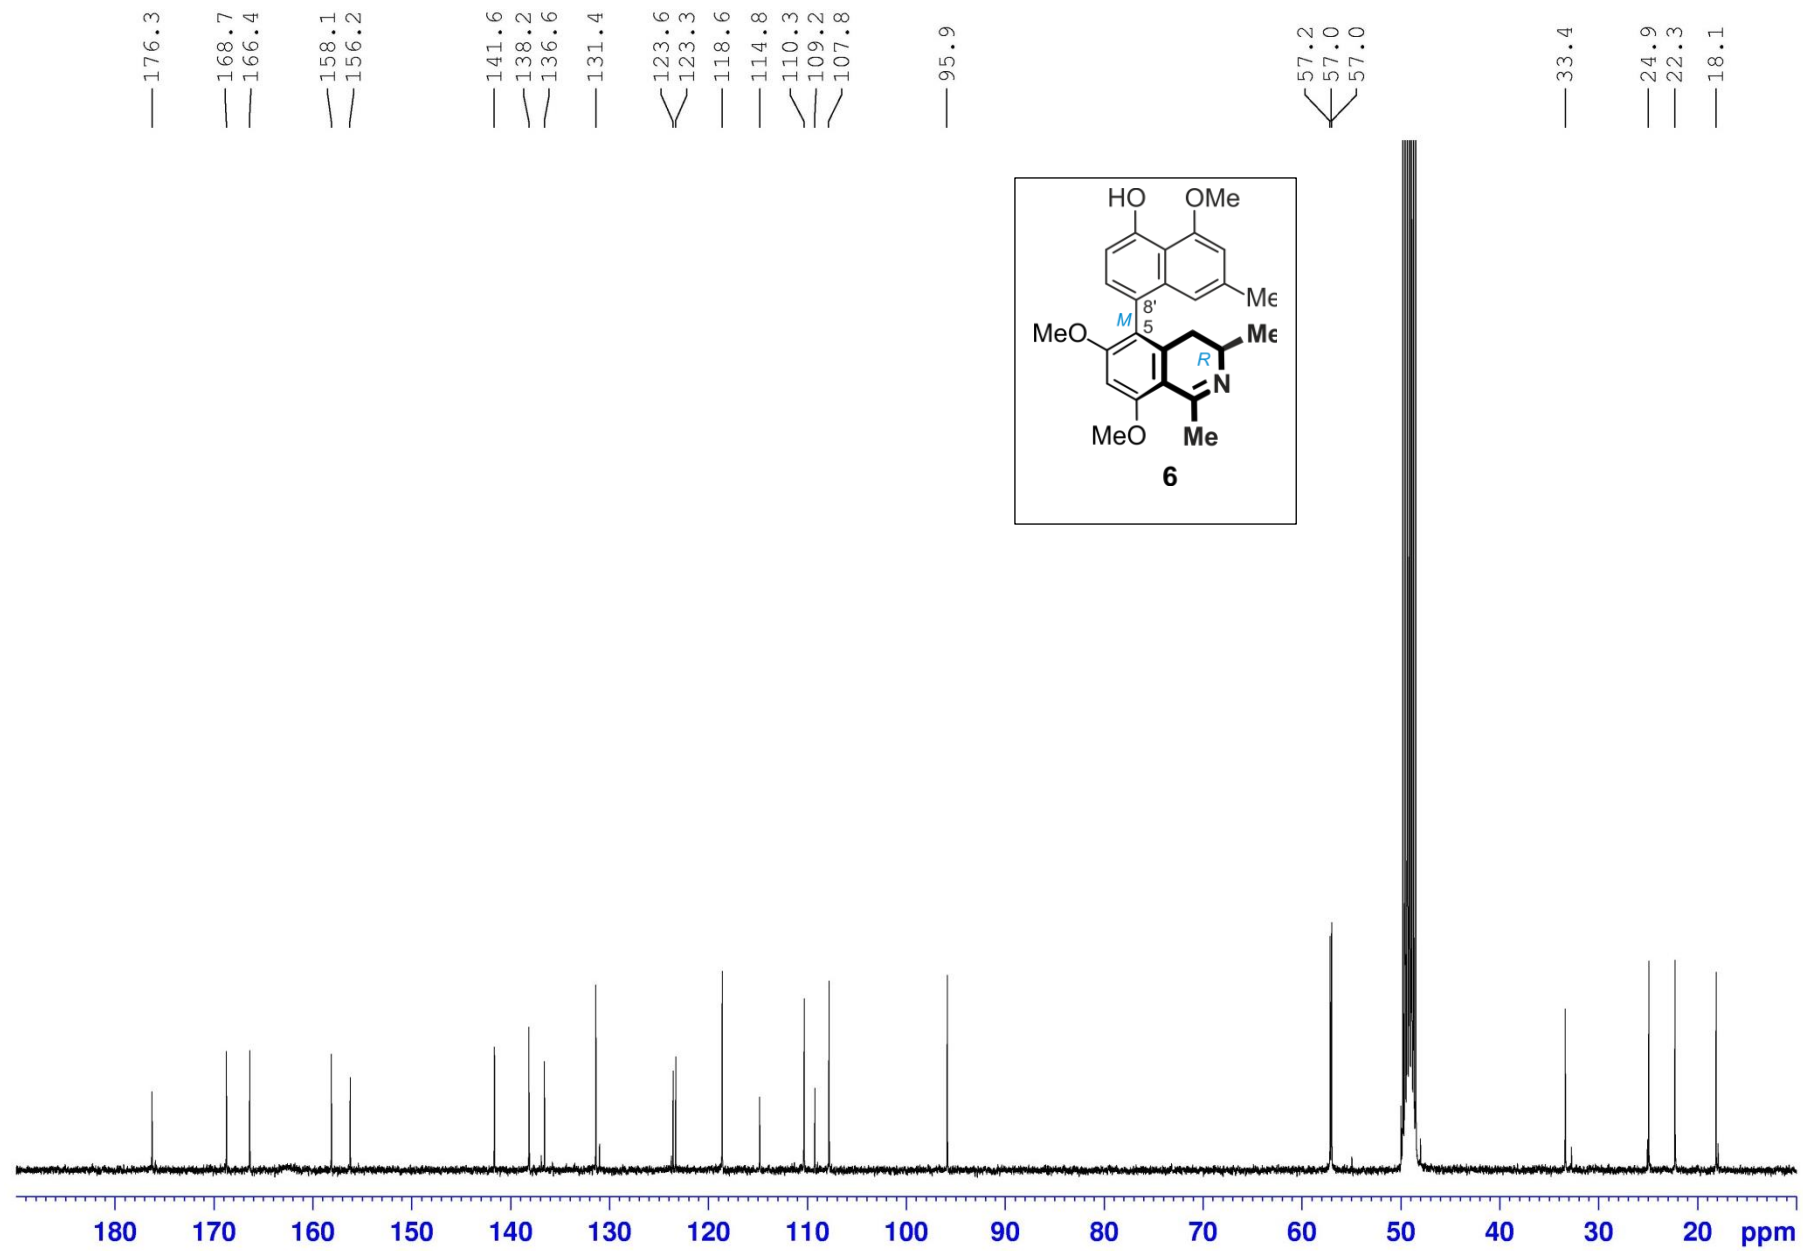

Fig. S58  $^{13}\text{C}$  NMR spectrum of compound **6** in methanol- $d_4$

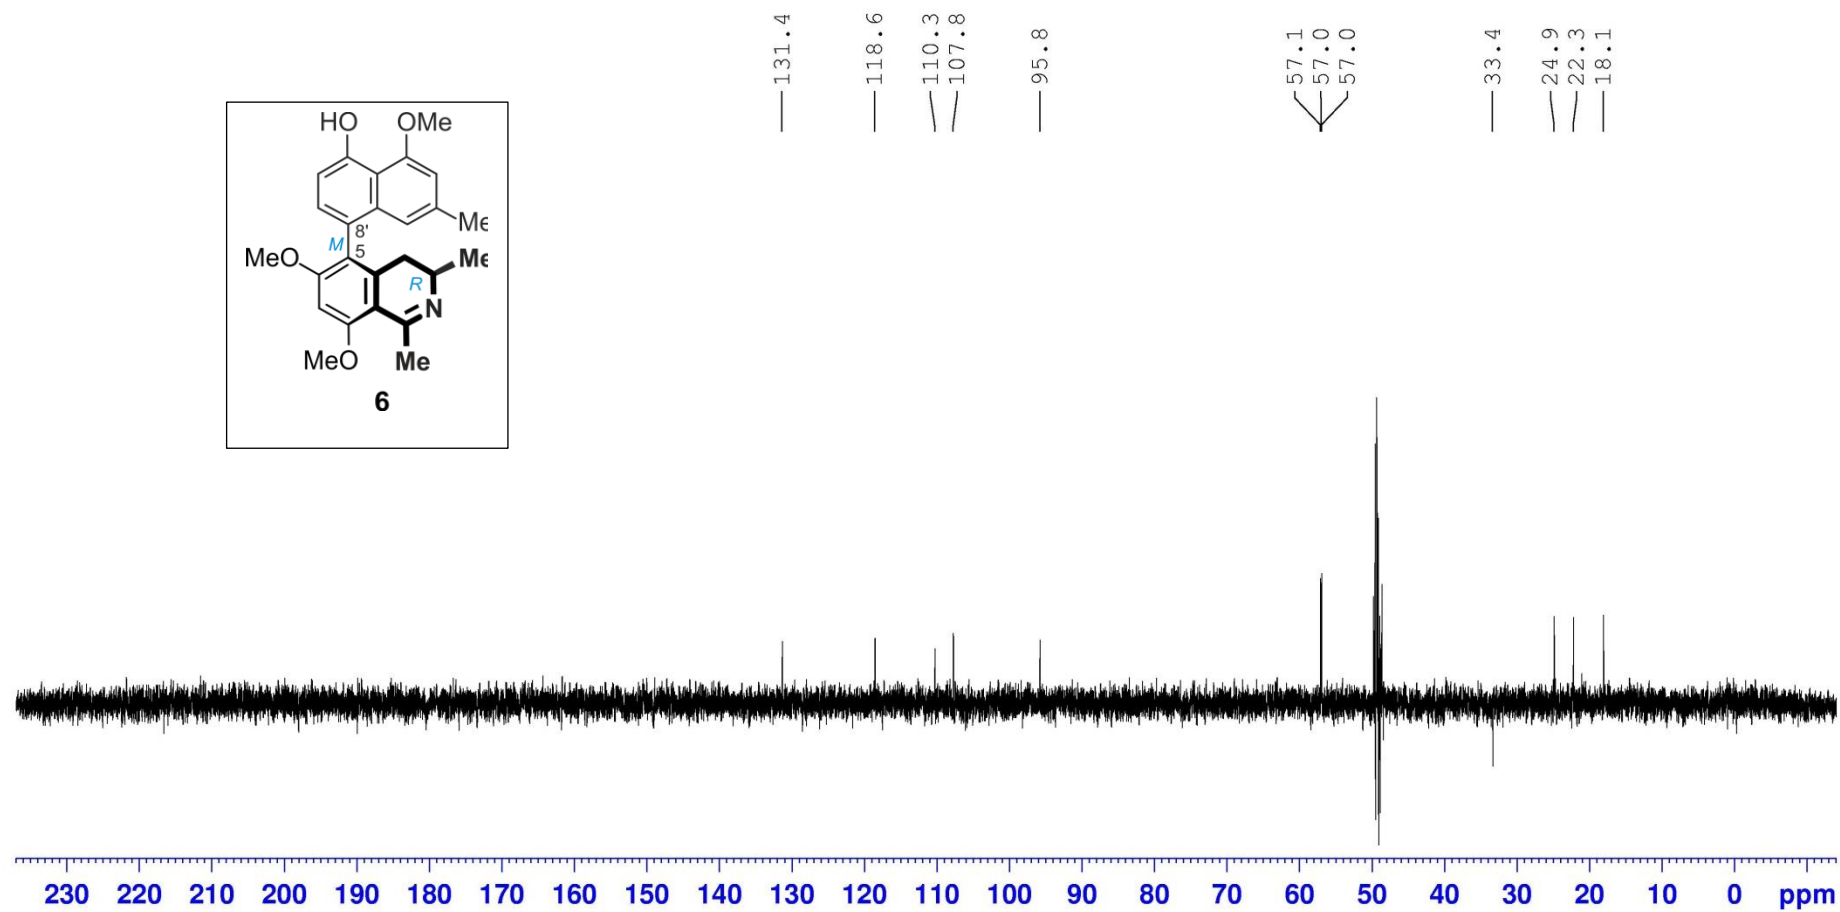

**Fig. S59** DEPT-135 NMR spectrum of compound **6** in methanol- $d_4$

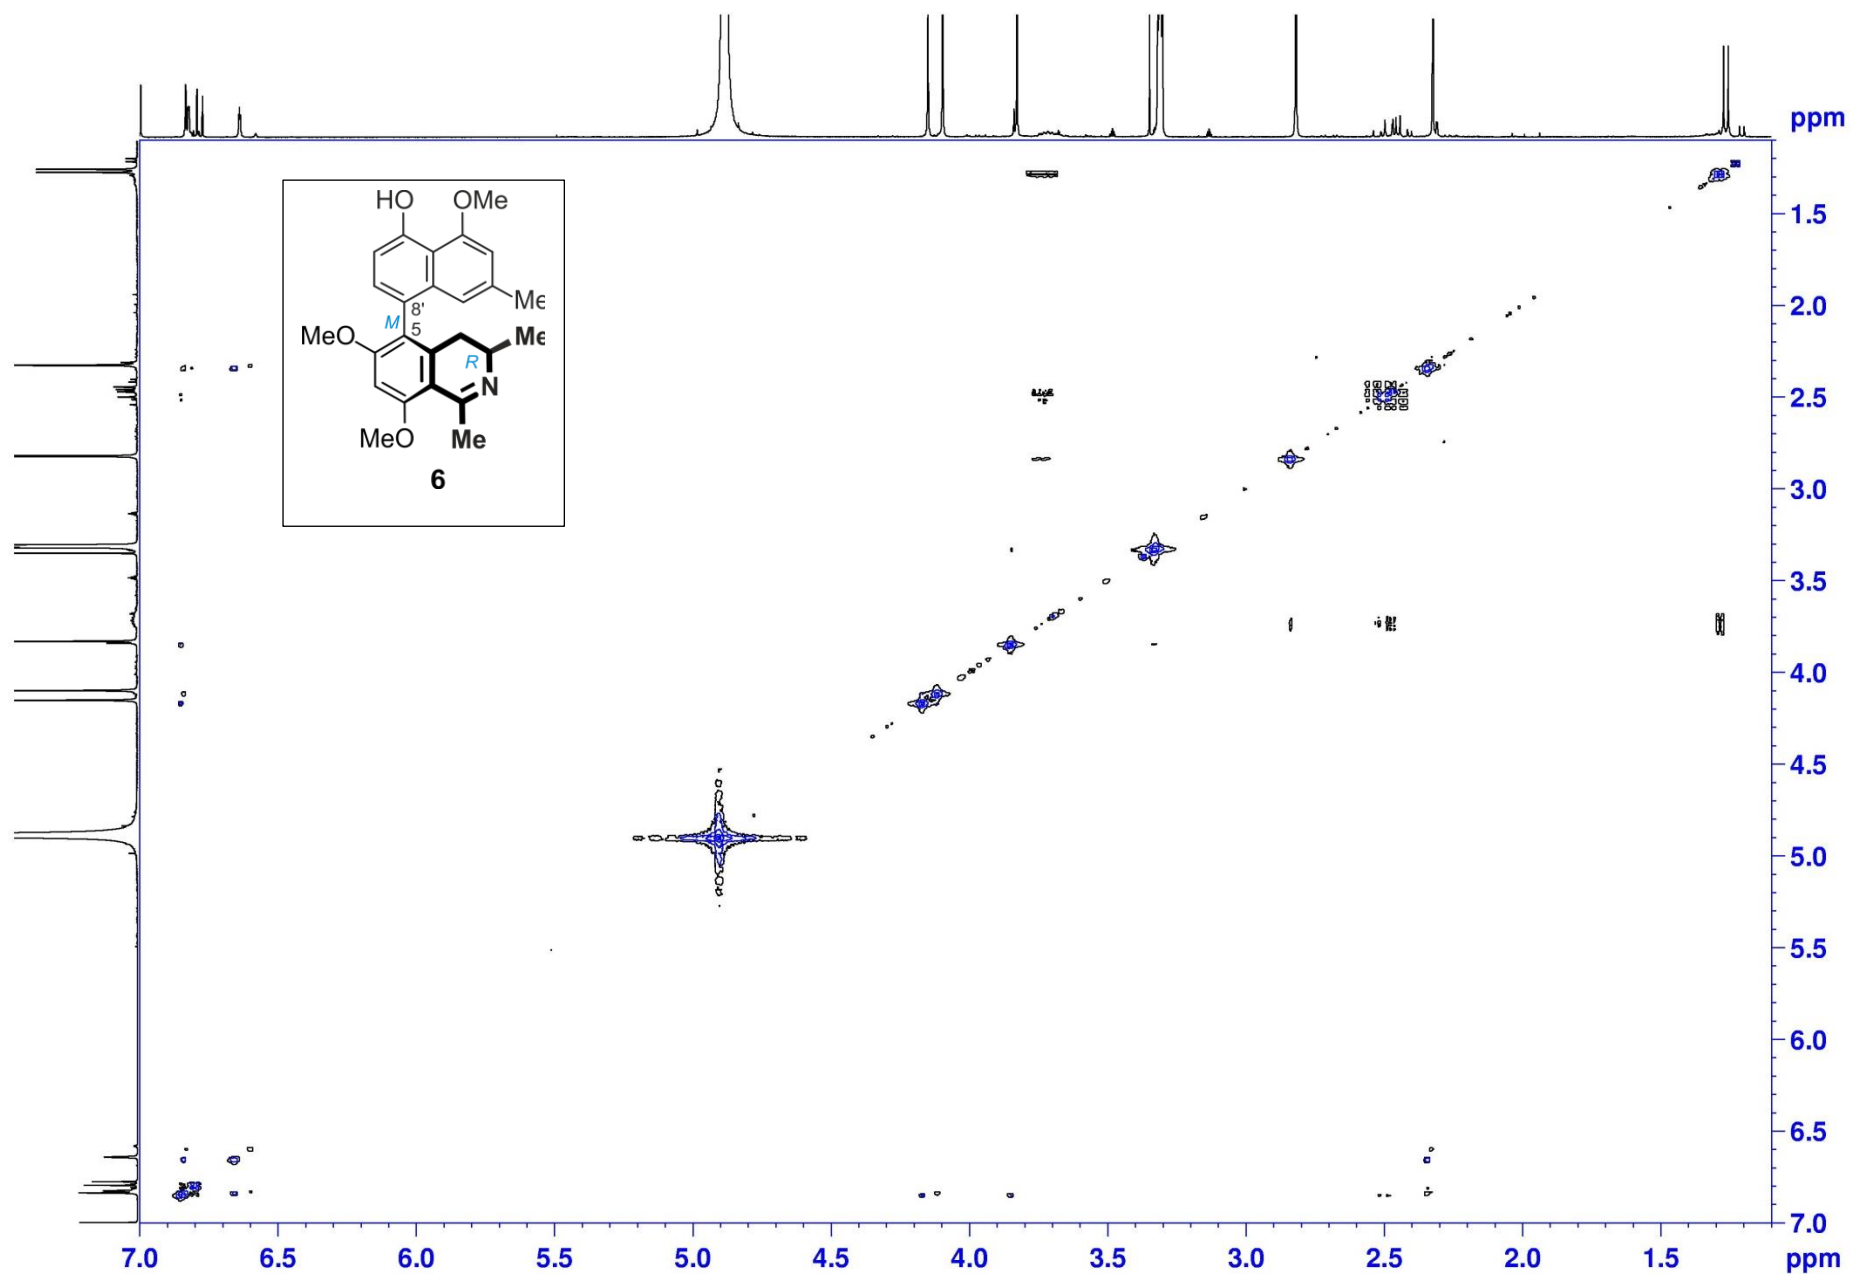

Fig. S60 COSY NMR spectrum of compound **6** in methanol- $d_4$

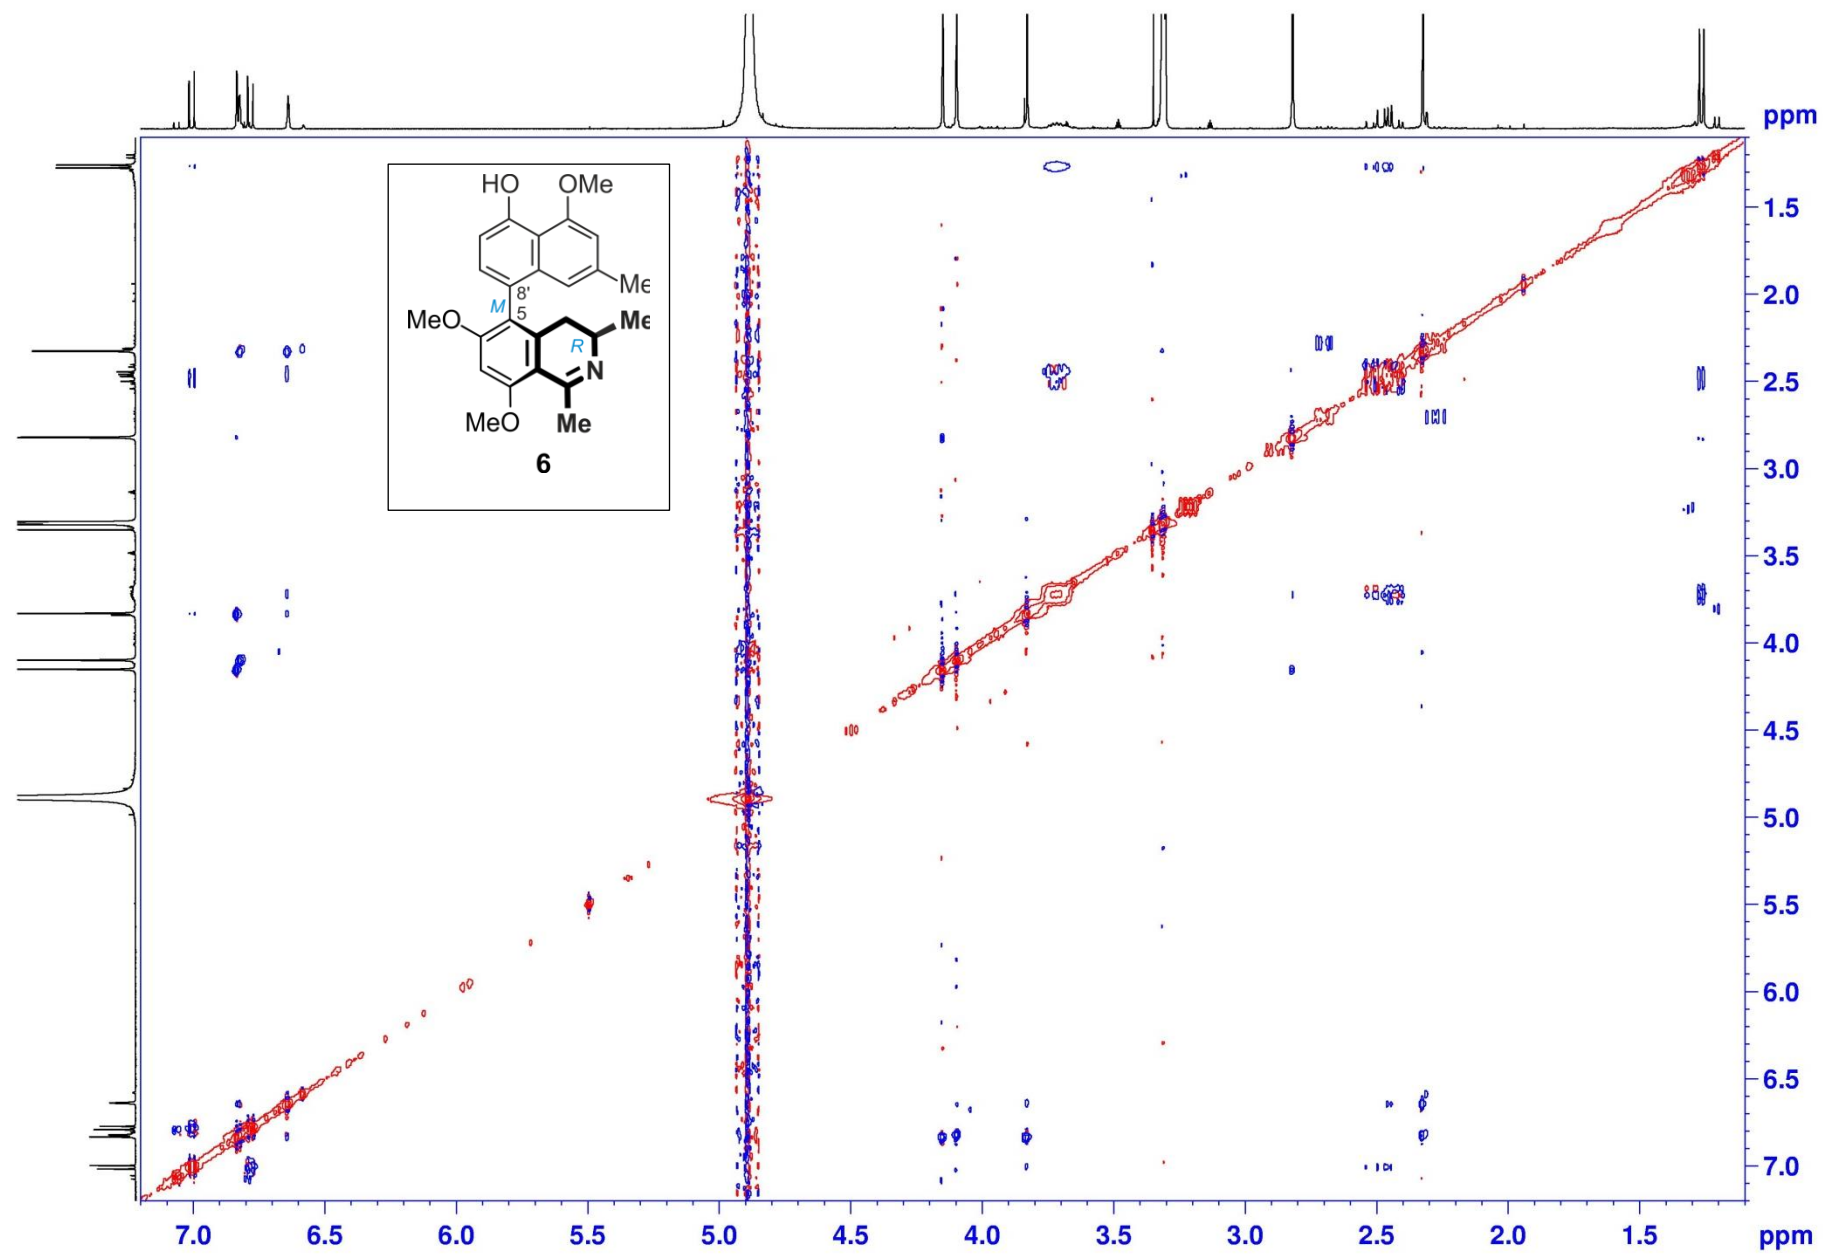

Fig. S61 NOESY NMR spectrum of compound 6 in methanol- $d_4$

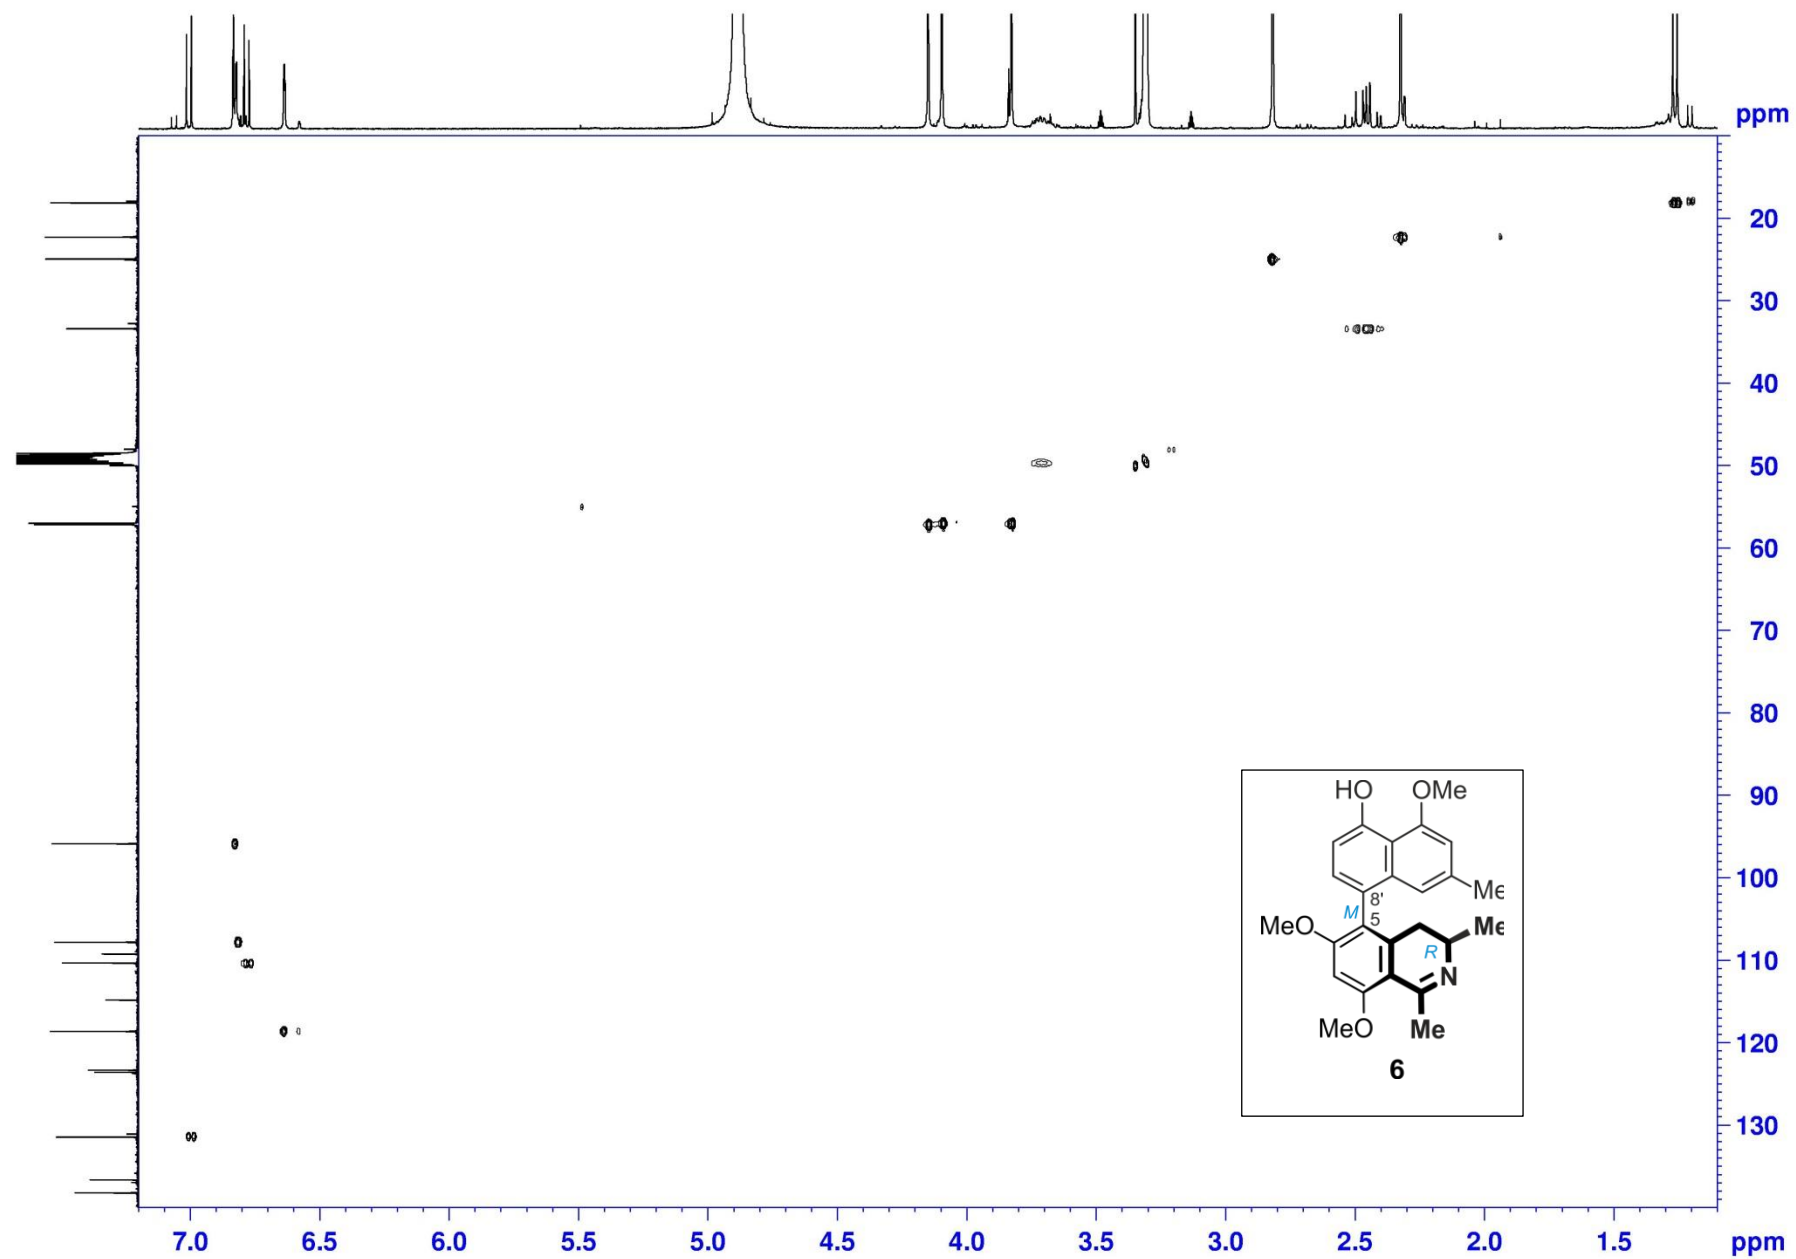

Fig. S62 HSQC NMR spectrum of compound **6** in methanol- $d_4$

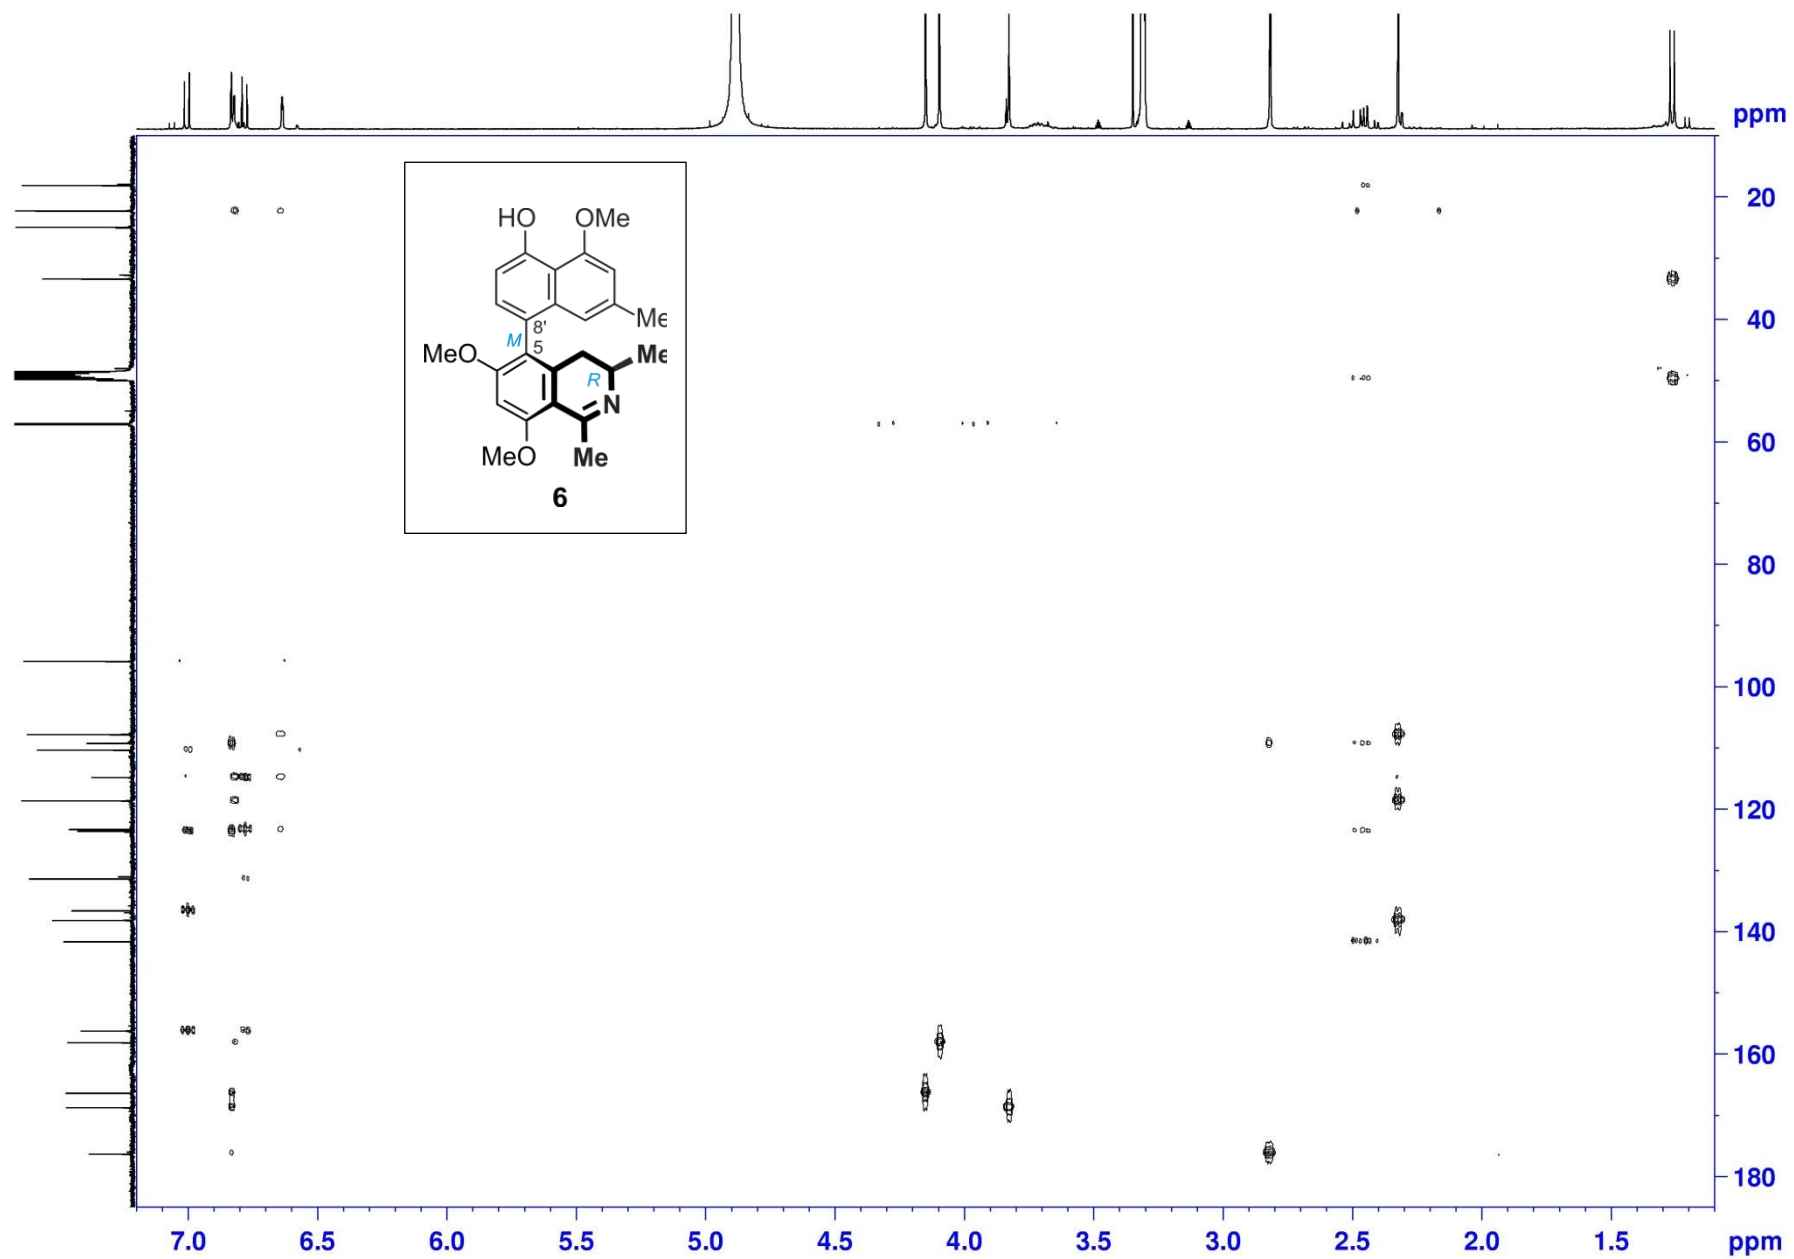

Fig. S63 HMBC NMR spectrum of compound **6** in methanol-*d*<sub>4</sub>



# Mass Spectrum SmartFormula Report

## Analysis Info

Analysis Name D:\Data\Spektren2017\2017\_3187\_BRI\_BO3-DCM-2\_28\_01\_2709.d  
 Method automation\_esi\_tune\_pos\_low\_ja\_meoh.m  
 Sample Name 2017\_3187\_BRI\_BO3-DCM-2  
 Comment Kimbadi Lombe Blaise  
 BO3-DCM-2  
 4pmol/ul in MeOH

Acquisition Date 10/18/2017 12:51:23 PM  
 Operator J.Adelmann  
 Instrument micrOTOF-Q III 8228888.20516

## Acquisition Parameter

|             |            |                 |           |                  |           |
|-------------|------------|-----------------|-----------|------------------|-----------|
| Source Type | ESI        | Ion Polarity    | Positive  | Set Nebulizer    | 0.7 Bar   |
| Focus       | Not active | Set Funnel 1 RF | 100.0 Vpp | Set Dry Heater   | 200 °C    |
| Scan Begin  | 50 m/z     | Set Funnel 2 RF | 200.0 Vpp | Set Dry Gas      | 5.0 l/min |
| Scan End    | 3500 m/z   | Set Hexapole RF | 300.0 Vpp | Set Divert Valve | Source    |

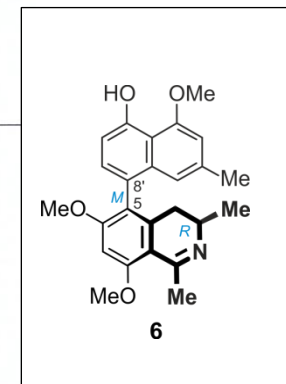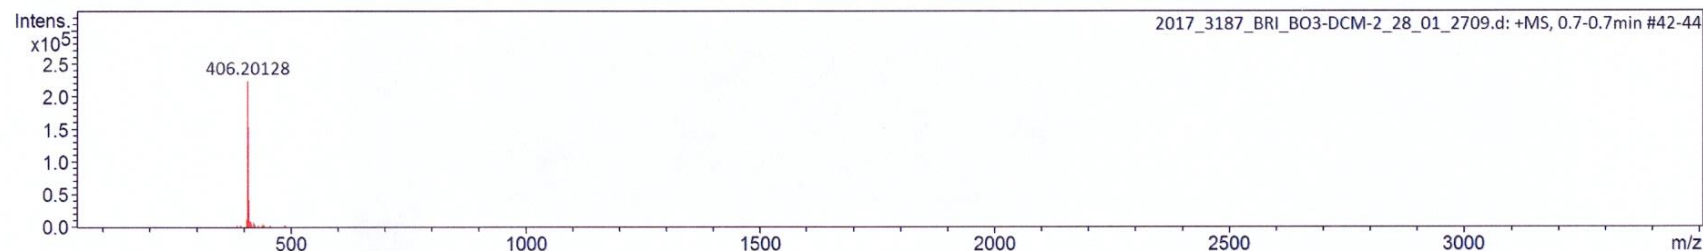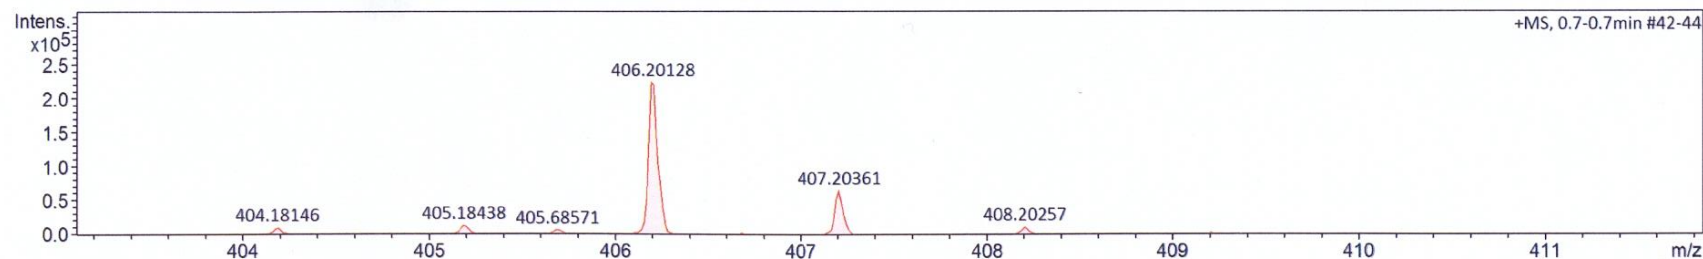

| Meas. m/z | # | Ion Formula                                     | m/z       | err [ppm] | mSigma | # mSigma | Score  | rdb  | e <sup>-</sup> Conf | N-Rule |
|-----------|---|-------------------------------------------------|-----------|-----------|--------|----------|--------|------|---------------------|--------|
| 406.20128 | 1 | C <sub>25</sub> H <sub>28</sub> NO <sub>4</sub> | 406.20128 | 0.01      | 1.9    | 1        | 100.00 | 12.5 | even                | ok     |

Fig. S64 HRESIMS spectrum of compound 6

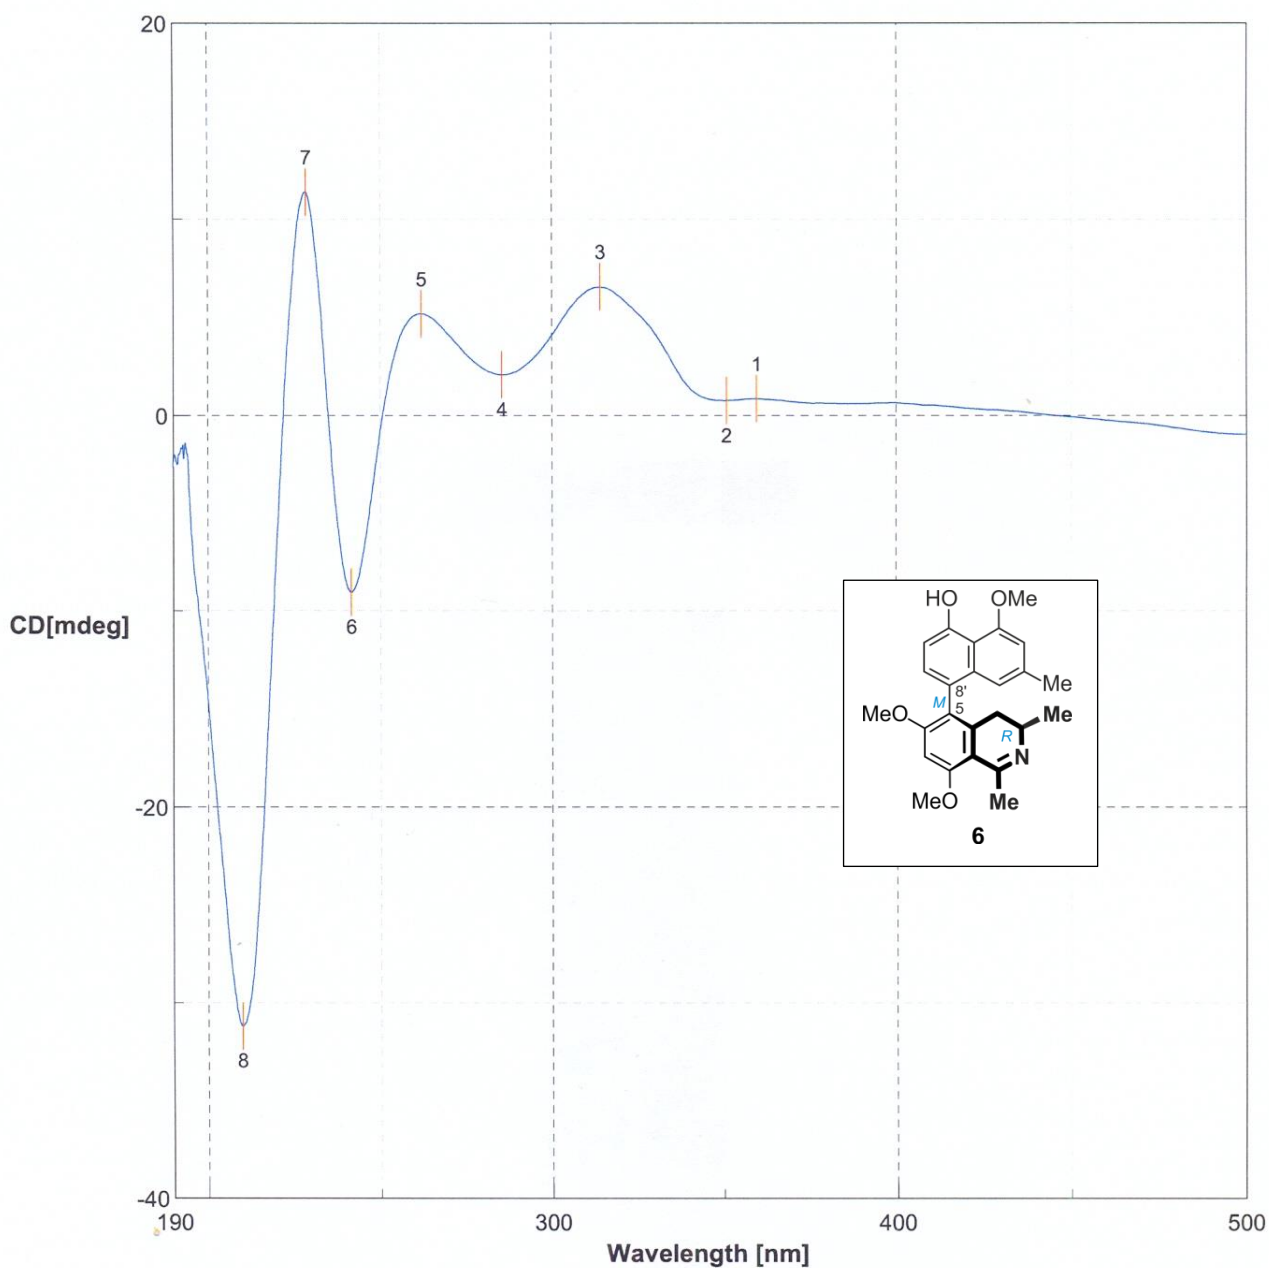

Date/Time 07.12.2015 16:07  
 Operator kimbadi  
 File Name BO3-DCM-2\_0#008.jws  
 Sample Name BO3-DCM-2\_0.5mm\_MeOH  
 Comment offline

| No. | nm    | CD[mdeg] | No. | nm    | CD[mdeg] | No. | nm    | CD[mdeg] |
|-----|-------|----------|-----|-------|----------|-----|-------|----------|
| 1   | 359.8 | 0.84886  | 2   | 351   | 0.744126 | 3   | 314.2 | 6.54529  |
| 4   | 285.5 | 2.06942  | 5   | 261.9 | 5.18564  | 6   | 241.5 | -9.03143 |
| 7   | 228.5 | 11.3892  | 8   | 209.9 | -31.1757 |     |       |          |

**Fig. S65** CD spectrum of compound **6** in methanol

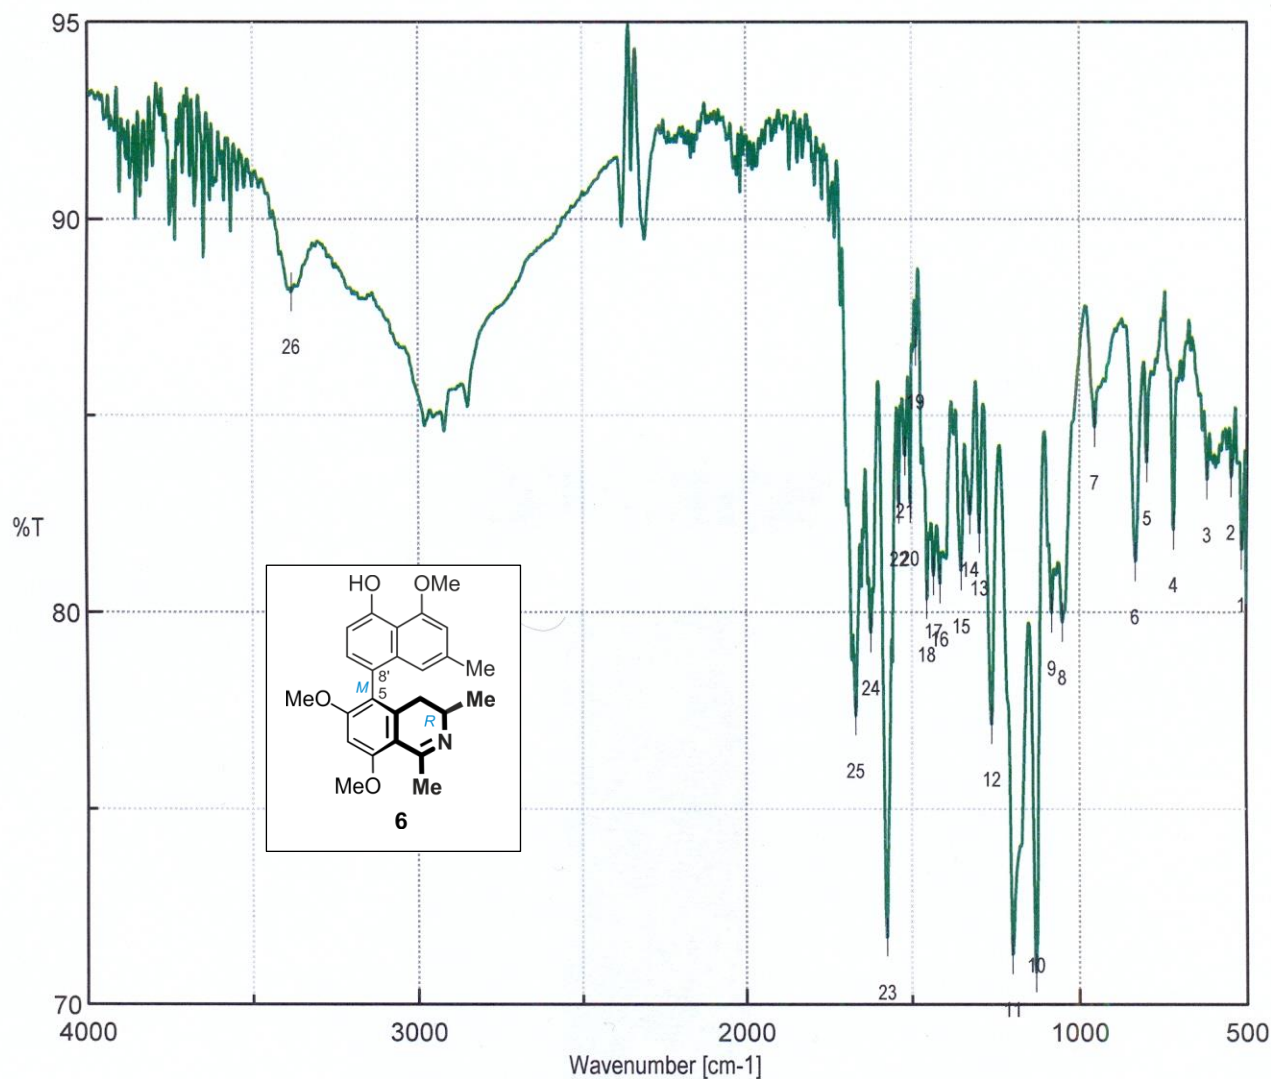

Results of Peak Find

| No. | Position | Intensity | No. | Position | Intensity |
|-----|----------|-----------|-----|----------|-----------|
| 1   | 514.901  | 81.5707   | 2   | 546.72   | 83.4091   |
| 3   | 618.074  | 83.3565   | 4   | 719.318  | 82.0696   |
| 5   | 798.385  | 83.7888   | 6   | 834.062  | 81.2748   |
| 7   | 955.555  | 84.6867   | 8   | 1051.98  | 79.7329   |
| 9   | 1083.8   | 79.9696   | 10  | 1130.08  | 70.8203   |
| 11  | 1199.51  | 71.2812   | 12  | 1263.15  | 77.1434   |
| 13  | 1298.82  | 81.9981   | 14  | 1327.75  | 82.4623   |
| 15  | 1353.78  | 81.0307   | 16  | 1418.39  | 80.7039   |
| 17  | 1436.71  | 80.9161   | 18  | 1456.96  | 80.3115   |
| 19  | 1488.78  | 86.739    | 20  | 1507.1   | 82.757    |
| 21  | 1521.56  | 83.9655   | 22  | 1540.85  | 82.7297   |
| 23  | 1576.52  | 71.7095   | 24  | 1625.7   | 79.471    |
| 25  | 1670.05  | 77.3638   | 26  | 3383.5   | 88.127    |

[Comments]

Sample name BO3-DCM-2b  
 Comment drop(MeOH)  
 User Kimbadi  
 Division AK Bringmann  
 Company Uni Würzburg

[Measurement Information]

Model Name FT/IR-4600typeA  
 Serial Number D063461786

Accessory ATR PRO ONE  
 Accessory S/N A070661809  
 Incident angle 45 deg

Measurement Date 20.12.2017 16:02

Light Source Standard  
 Detector TGS  
 Accumulation 16  
 Resolution 4 cm-1  
 Zero Filling On  
 Apodization Cosine  
 Gain Auto (4)  
 Aperture Auto (7.1 mm)  
 Scanning Speed Auto (2 mm/sec)  
 Filter Auto (30000 Hz)

Fig. S66 IR spectrum of compound 6

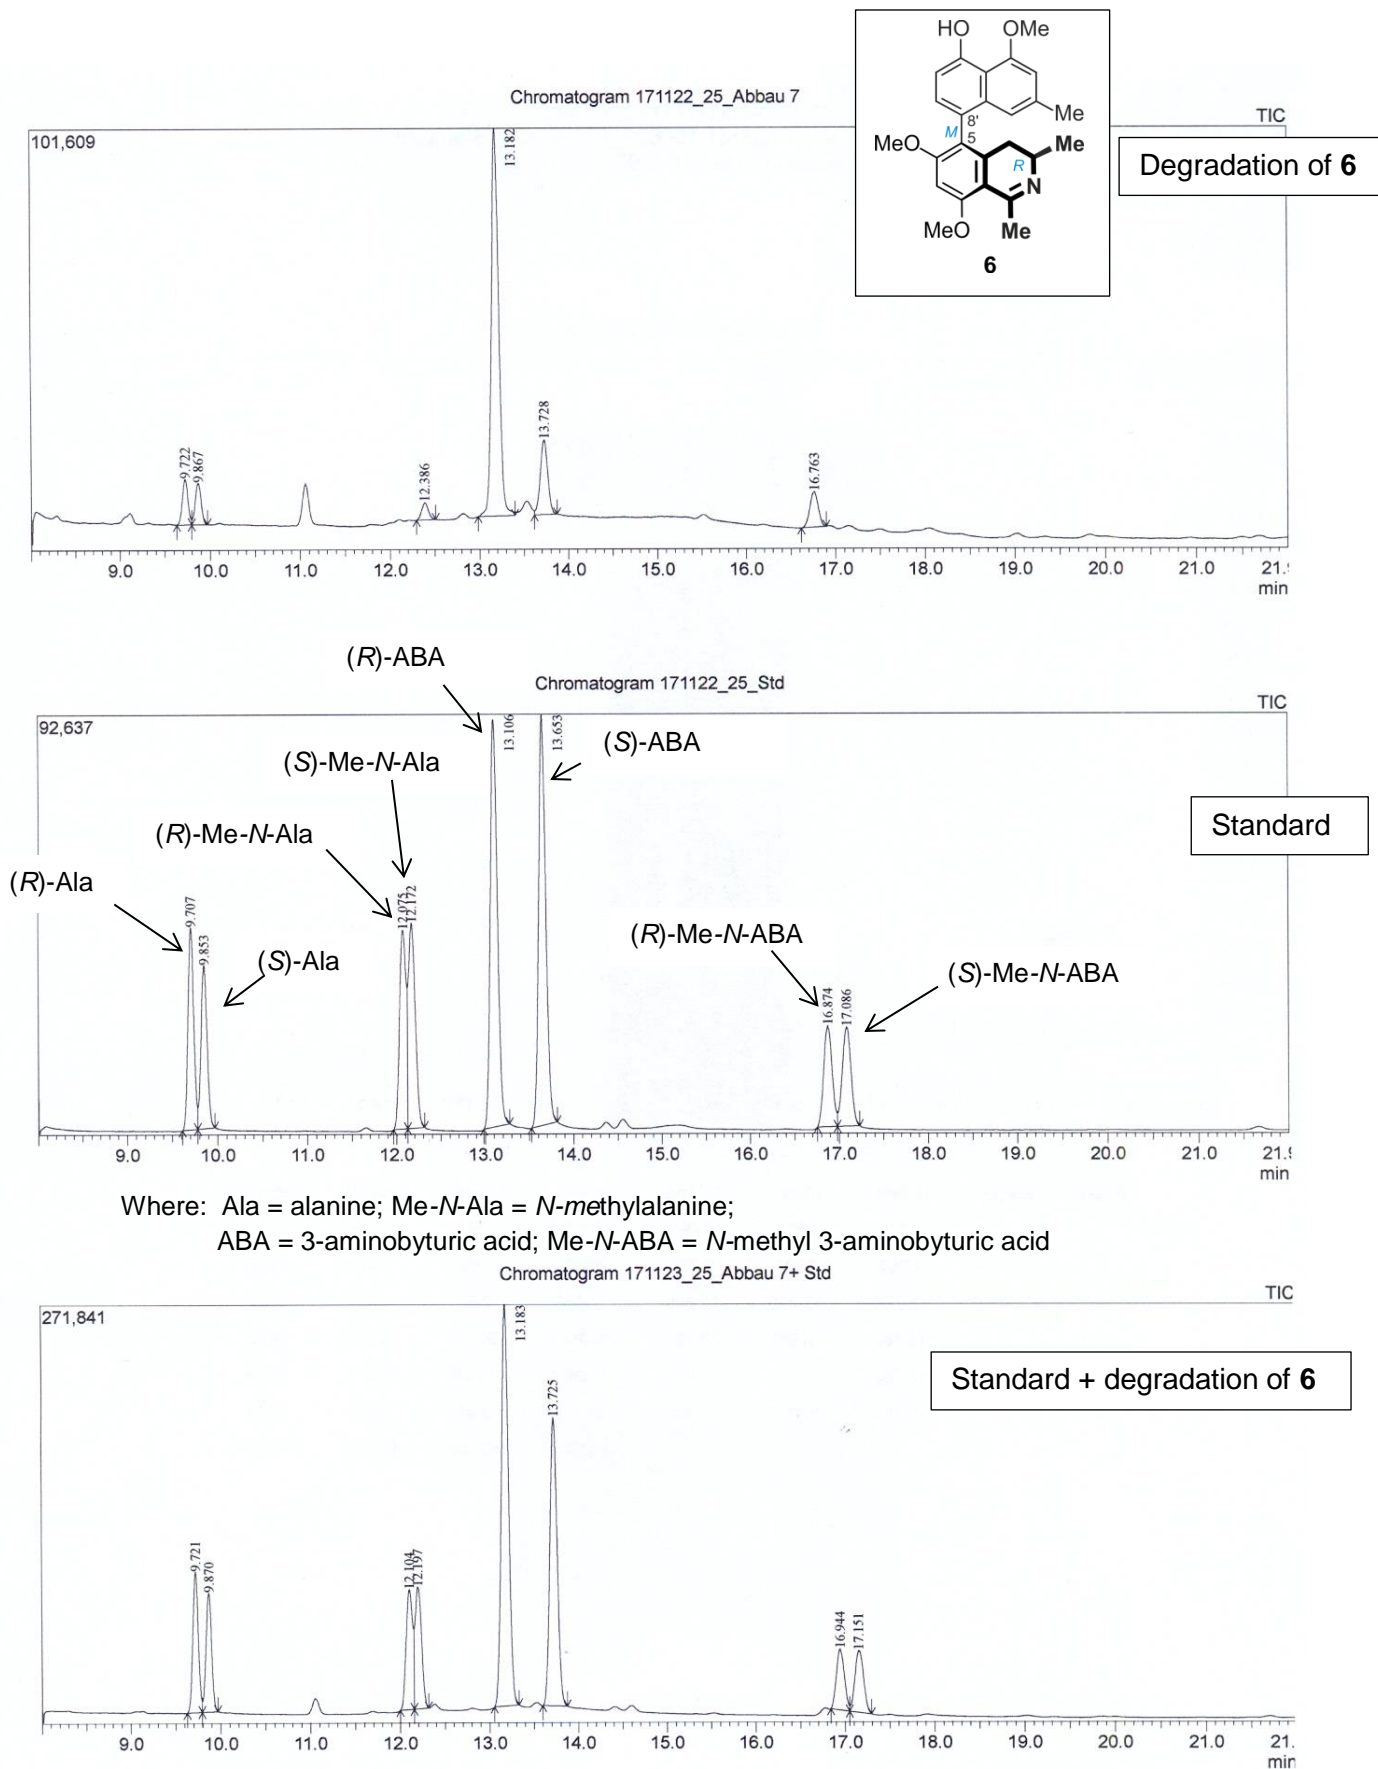

Fig. S67 Results of the oxidative degradation of compound 6
